1 **TITLE**

2 Structural insights into loss of function of a pore forming toxin and its role in pneumococcal  
3 adaptation to an intracellular lifestyle

4  
5 **AUTHORS**

6 Dilip C. Badgajar<sup>1†</sup>, Anjali Anil<sup>1†</sup>, Angharad E. Green<sup>2†</sup>, Manalee Vishnu Surve<sup>1</sup>, Shilpa  
7 Madhavan<sup>1</sup>, Alison Beckett<sup>3</sup>, Ian A. Prior<sup>3</sup>, Barsa K. Godsora<sup>1</sup>, Sanket B. Patil<sup>1</sup>, Prachi Kadam  
8 More<sup>1</sup>, Shruti Guha Sarkar<sup>1</sup>, Andrea Mitchell<sup>4</sup>, Rinti Banerjee<sup>1</sup>, Prashant S. Phale<sup>1</sup>, Timothy J.  
9 Mithcell<sup>4</sup>, Daniel R. Neill<sup>2\*</sup>, Prasenjit Bhaumik<sup>1\*</sup>, Anirban Banerjee<sup>1\*</sup>

10  
11 **AFFILIATIONS**

12 <sup>1</sup>Department of Biosciences and Bioengineering, Indian Institute of Technology Bombay, Powai,  
13 Mumbai-400076, Maharashtra, INDIA.

14 <sup>2</sup>Department of Clinical Infection, Microbiology and Immunology, Institute of Infection and  
15 Global Health, University of Liverpool, Liverpool, L69 - 7BE, UK.

16 <sup>3</sup>Division of Cellular and Molecular Physiology, Institute of Translational Medicine, University of  
17 Liverpool, Liverpool, L69 3BX, UK.

18 <sup>4</sup>Institute of Microbiology and Infection, College of Medical and Dental Sciences, University of  
19 Birmingham, Birmingham, B15 2TT, UK.

20 **†These authors contributed equally to this work**

21  
22 **\*CORRESPONDING AUTHORS:**

23 Daniel R. Neill; E-mail: [D.Neill@liverpool.ac.uk](mailto:D.Neill@liverpool.ac.uk), Phone: +44-1517 959622

24 Prasenjit Bhaumik; E-mail: [pbhaumik@iitb.ac.in](mailto:pbhaumik@iitb.ac.in), Phone: +91-22-25767748

25 Anirban Banerjee; E-mail: [abanerjee@iitb.ac.in](mailto:abanerjee@iitb.ac.in), Phone: +91-22-25767794

26  
27 **KEY WORDS:** *Streptococcus pneumoniae*, infection tolerance, autophagy, pneumolysin, pore-  
28 forming toxin, cholesterol dependent cytolysin, cation- $\pi$  interaction

29 **ABSTRACT**

30 The opportunistic pathogen *Streptococcus pneumoniae* has dual lifestyles: one of an asymptomatic  
31 colonizer in the human nasopharynx and the other of a deadly pathogen invading sterile host  
32 compartments. The latter triggers an overwhelming inflammatory response, partly driven via pore  
33 forming activity of the cholesterol dependent cytolysin (CDC), pneumolysin. Although  
34 pneumolysin-induced inflammation drives person-to-person transmission from nasopharynx, the  
35 primary reservoir for pneumococcus, it also contributes to high mortality rates, creating a  
36 bottleneck that hampers widespread bacterial dissemination, thus acting as a double-edged sword.  
37 Serotype 1 ST306, a widespread pneumococcal clone, harbours a non-hemolytic variant of  
38 pneumolysin (Ply-NH). Performing crystal structure analysis of Ply-NH, we identified Y150H and  
39 T172I as key substitutions responsible for loss of its pore forming activity. We uncovered a novel  
40 inter-molecular cation- $\pi$  interaction, governing formation of the transmembrane  $\beta$ -hairpins (TMH)  
41 in the pore state of Ply, which can be extended to other CDCs. H150 in Ply-NH disrupts this  
42 interaction, while I172 provides structural rigidity to domain-3, through hydrophobic interactions,  
43 inhibiting TMH formation. Loss of pore forming activity enabled improved cellular invasion and  
44 autophagy evasion, promoting an atypical intracellular lifestyle for pneumococcus, a finding that  
45 was corroborated in *in vivo* infection models. Attenuation of inflammatory responses and tissue  
46 damage promoted tolerance of Ply-NH-expressing pneumococcus in the lower respiratory tract.  
47 Adoption of this altered lifestyle may be necessary for ST306 due to its limited nasopharyngeal  
48 carriage, with loss of pore forming ability of Ply facilitating a benign association of SPN in an  
49 alternative, intracellular host niche.

50 **AUTHOR SUMMARY**

51 *Streptococcus pneumoniae*, the main causative agent of pneumonia, triggers inflammation and  
52 tissue damage by expressing a pore-forming toxin, pneumolysin (Ply). Ply-induced inflammation  
53 drives pneumococcal transmission from nasopharynx (its primary reservoir), but also contributes  
54 to host mortality, limiting its occupiable habitats. Here, we uncovered the structural basis for loss  
55 of pore-forming activity of a Ply variant, present in Serotype 1 ST306, and observed that this  
56 enabled adoption of an intracellular lifestyle, attenuating inflammatory responses and prolonging  
57 host tolerance of pneumococcus in the lower airways. This commensal-like lifestyle, resembling  
58 that of members of the mitis group of Streptococci, might have evolved within ST306 by loss of  
59 function *ply* mutations, compensating for limited nasopharyngeal carriage capacity by facilitating  
60 adaptation to an alternate niche.

## 61 INTRODUCTION

62 Virulence of a microbe is a highly dynamic trait dependent primarily on the niche it occupies and  
63 the availability of an alternate reservoir. The induction of excess morbidity and mortality is a cost  
64 associated with virulence for pathogens that rely upon their hosts for onward transmission. Recent  
65 studies suggest that pathogens can undergo attenuation of virulence inside the host, as long as  
66 transmission remains uncompromised (1). Such traits enable microbial colonization and  
67 proliferation with minimal harm to the host and form the basis of the “infection tolerance” concept  
68 that challenges the paradigm of the arms race in infection biology (2).

69 *Streptococcus pneumoniae* (the pneumococcus or SPN) is a Gram positive, alpha-hemolytic  
70 bacterium and is the leading cause of community-acquired pneumonia, pediatric empyema and  
71 bacterial meningitis. A classic opportunistic pathogen, SPN has a characteristic asymptomatic  
72 colonization phase in the human nasopharynx, its primary reservoir (3). Nasopharyngeal  
73 colonization is a prerequisite for the development of pneumococcal disease, but the relative  
74 invasiveness of SPN varies between serotypes (4), more than 97 different types of which have  
75 been classified based on the composition of capsular polysaccharide (5). Although pneumococcal  
76 virulence factors induce cytotoxicity, the host inflammatory response triggered against these  
77 factors is the major mediator of pathology and lethality associated with invasive pneumococcal  
78 disease (IPD). The key trigger of this dysregulated host inflammation is pneumolysin (Ply), a pore  
79 forming toxin belonging to the family of cholesterol dependent cytolysins (CDC) (S1 Fig),  
80 expressed by all SPN strains. In addition to the extensive cellular damage resulting from pore  
81 forming activity on host cell membranes, Ply drives host inflammatory and immune responses. At  
82 low levels, Ply can stimulate tolerogenic host responses via interaction with mannose receptor C

83 type 1 (MRC-1) (6), but at the high concentrations achieved during IPD, this result in excessive  
84 inflammation driven via its interactions with Toll-like receptors (TLR4) (7) and activation of the  
85 NOD-like receptor family pyrin domain containing 3 (NLRP3) inflammasome (8). Subsequent IL-  
86 1 signaling has been identified to play a key role in inflammatory clearance of SPN from the  
87 nasopharynx (9). On the other hand, inflammation triggered by the pore-forming activity of Ply in  
88 the upper respiratory tract, was found to be vital for pneumococcal shedding and transmission (10).  
89 These findings provide an explanation for why SPN lineages have not lost this toxin over the  
90 course of evolution, despite its potential to kill the host, leading to loss of reservoir.

91 Although all SPN isolates express Ply, around 20 allelic variants with differences in their  
92 hemolytic (cytolytic) activity have been identified to date (S2 Fig) (11-13), and these  
93 polymorphisms are especially prevalent amongst serotype 1 lineages. Particularly noteworthy is  
94 the presence of a non-hemolytic variant (Ply-NH; encoded by allele 5) in serotype 1 ST306, one  
95 of the most successful pneumococcal clonal clusters (14). ST306 is commonly associated with  
96 outbreaks of non-lethal respiratory tract infections (11). Presence of Ply-NH is believed to be one  
97 of the key factors behind the clonal expansion of ST306 isolates (11), although it is unclear what  
98 advantage SPN derives from loss of Ply's hemolytic activity. Intriguingly, serotype 1 isolates are  
99 rarely found colonizing the nasopharynx (15). Hence, it is unclear as to how the non-hemolytic  
100 clones have been successfully maintained in the population, despite loss of their primary reservoir  
101 and the phenotype (Ply pore-induced inflammation) that is critical for host to host transmission.

102 Ply-NH differs from wild type hemolytic Ply (Ply-H) by the presence of 4 substitutions (Y150H, T172I,  
103 K224R, A265S) and 2 deletions ( $\Delta$ V270 and  $\Delta$ K271) (11) (S3 Fig). The structures of monomeric and  
104 pore forms of Ply-H were recently solved; however, none of the delineated amino acid residues  
105 critical for pore formation match with the mutations present in Ply-NH (16-18). A detailed

106 structural analysis of Ply-NH may therefore uncover the key interactions required for pore  
107 formation by Ply, or by CDCs in general.

108 In the present study, we demonstrate that although Ply-NH is able to bind and oligomerize on  
109 cholesterol containing membranes, it is unable to form pores. Our studies uncovered a novel  
110 cation- $\pi$  interaction, governing pore formation in Ply-H and related CDCs, loss of which inhibits  
111 transmembrane  $\beta$ -hairpin (TMH) formation and subsequent pore formation in Ply-NH. Enhanced  
112 cellular invasion and evasion of host intracellular defenses, owing to loss of Ply's pore-forming  
113 ability, allows SPN to establish a novel intracellular niche in the lungs. The resulting subdued  
114 inflammatory response permits establishment of a stalemate situation of host "tolerance" of SPN  
115 in the lower respiratory tract, favoring persistence within an alternate niche. Extended maintenance  
116 of active reservoirs, in the absence of damaging inflammation, prolongs the period for potential  
117 transmission and successful clonal expansion of ST306.

## 118 RESULTS

### 119 *Ply-NH can bind and oligomerize on membranes but is incapable of forming pores*

120 We first compared the pore formation dynamics of Ply-NH and Ply-H. Hemolysis assay performed  
121 using purified recombinant Ply (rPly) confirmed that Ply-NH remained non-hemolytic over a wide  
122 range of concentrations (up to 0.1  $\mu$ M), in contrast to Ply-H which caused complete lysis of red  
123 blood cells (RBCs) with as little as 0.01  $\mu$ M protein (Fig 1A). However, pore forming ability and  
124 hemolytic activity are not always synonymous, as lack of hemolytic activity indicates the inability  
125 of the toxin to form large enough pores for the release of hemoglobin, but does not exclude the  
126 possibility that the toxin forms smaller pores. To explore this, we performed liposome leakage  
127 assays using the small fluorescent dye calcein (0.6 kDa, hydrodynamic radii  $\sim$  0.74 nm),  
128 encapsulated at quenching concentration in liposomes. Treatment of these liposomes with  
129 increasing concentrations of Ply-H showed a time dependent increase in the fluorescence intensity  
130 associated with liposome permeabilization and release of calcein. In contrast, Ply-NH failed to  
131 cause calcein release, confirming its inability to form even smaller pores (Fig 1B).

132 To determine the molecular basis for the inability of Ply-NH to form pores, each step of pore  
133 formation, namely, (a) binding of monomers to membrane cholesterol, (b) oligomerization to form  
134 pre-pore and (c) pre-pore to pore transition (TMH formation) was examined. Comparison of the  
135 cholesterol binding ability of Ply-NH with that of Ply-H was performed by pre-incubating Ply  
136 variants with cholesterol, followed by hemolysis assay. Ply-H showed a decrease in hemolytic  
137 activity with increasing cholesterol concentrations, while Ply-NH remained non-lytic throughout  
138 (Fig 1C). Western blot analysis of RBC ghost membrane incubated with Ply-NH showed that  
139 although it doesn't cause hemolysis, it interacts with the membrane in a similar manner to Ply-H.

140 The interaction of both proteins with membranes was reduced upon cholesterol pre-treatment,  
141 suggesting that the mutations in Ply-NH do not alter its ability to bind cholesterol-containing  
142 membranes (Fig 1D). Transmission electron microscopy, used to visualize Ply assembly on  
143 membranes, demonstrated that Ply-H predominantly formed oligomeric rings (Fig 1E).  
144 Interestingly, Ply-NH also formed rings of similar size to Ply-H, which was further confirmed by  
145 SDS-PAGE, following treatment of eukaryotic membranes with the Ply variants (Fig 1F).

### 146 *Crystal structure of Ply-NH*

147 To decipher the molecular reasons behind loss of pore forming ability in Ply-NH, the crystal  
148 structure was solved (2.2 Å resolution) and was found to consist of 4 distinct domains, D1-D4 (Fig  
149 2A, S4 Fig and S1 Table). This is the first reported structure of a non-pore forming CDC. D1 is  
150 present at the N-terminal region and comprises of 6 anti-parallel  $\beta$  strands, loops and 5  $\alpha$  helices.  
151 D2 consists of five-stranded anti-parallel  $\beta$  sheets, which form the backbone of the structure and  
152 connect D4 with D1. D3 consists of a single antiparallel  $\beta$ -sheet with two  $\alpha$  helices on either side.  
153 D4, which is connected to D2 via the Arg-Asn-Gly flexible linker, comprised of two anti-parallel  
154  $\beta$  sheets, with the conserved undecapeptide at the end of the loop, which is required for binding to  
155 cholesterol.

156 The overall structural fold of Ply-NH was found to be similar to that of other reported CDCs, such  
157 as anthrolysin (3CQF) (19), intermedilysin (4BIK) (20), perfringolysin (PFO; 1PFO) (21) and  
158 pneumolysin (Ply-H; 5CR6 and 4QQA) (16, 22). Superposition of Ply-NH structure with the  
159 recently reported structures of Ply-H (5CR6 and 4QQA) (16, 22) produced root mean square  
160 deviation (r.m.s.d.) of 2.4 and 1.2 Å, respectively, over 471 C $\alpha$  atoms. Superposition of specific  
161 domains, D1-3 of Ply-NH and Ply-H (5CR6) yielded r.m.s.d. of 0.75 Å and alignment of only D4



162 yielded r.m.s.d. of 0.23 Å. Comparison with one Ply-H structure, 5CR6, showed higher r.m.s.d.  
163 compared to the other (4QQA) because of a relative 10 Å movement of D4 with respect to the rest  
164 of the molecule.

165 Monomers in the Ply-NH crystal were found to be tightly packed and this crystallographic  
166 arrangement resembles the monomer-monomer interaction interface that may form during  
167 formation of the pre-pore complex. Although both sides of the monomer show charge  
168 complementarities, the overall surface of the structure is highly electronegative (Fig 2B). However,  
169 D3 did not show any charge complementarity. In the well-studied and closely related CDC  
170 perfringolysin of *Clostridium perfringens*, the  $\alpha$  helices present in D3 are reported to undergo a  
171 conformational change to form TMH1 and TMH2, thereby inserting into the membrane (23). Since  
172 most of the substitutions and deletions are present in the D3 domain of Ply-NH, we hypothesized  
173 that its non-hemolytic nature might be a consequence of the conformational changes associated  
174 with these mutations.

### 175 ***Loss of a novel, essential cation- $\pi$ interaction inhibits TMH formation in Ply-NH***

176 Alignment of protein sequences indicate that the tyrosine residue at position 150 in Ply-H (Y150)  
177 is highly conserved across the different CDCs (Fig 2C). Generally, binding of CDC monomers on  
178 membranes drives conformational changes in D3 that trigger rotation of  $\beta$ 5 away from  $\beta$ 4,  
179 exposing the latter for interaction with  $\beta$ 1 of an adjacent monomer (23). The resultant  $\pi$ - $\pi$  stacking  
180 interaction between the conserved tyrosine (in  $\beta$ 1 of one monomer) and a semi-conserved  
181 phenylalanine (in  $\beta$ 4 of the adjacent monomer) stabilizes the  $\beta$  strands of the monomers,  
182 facilitating their insertion into the membrane. Surprisingly, the phenylalanine residue  
183 (corresponding to F318 of PFO) is replaced by V287 in Ply-H (Fig 2C), suggesting that association

184 of  $\beta 1$  with  $\beta 4$  in Ply-H might be driven by interactions other than the typically conserved  $\pi$ - $\pi$   
185 interactions. Mutation of three potential pairing residues of Y150 in the  $\beta 4$  region of Ply-H (E286,  
186 V287 and K288) to alanine resulted in loss of hemolytic activity, with the K288A mutant showing  
187 maximum loss (Fig 2D and S5A Fig), implying its involvement in a novel cation- $\pi$  interaction  
188 with Y150, essential for pore formation. This Y150-K288 interaction between adjacent monomers  
189 could also be identified in the pore-form model we developed based on the Ply-H pore complex  
190 cryo-EM structure (18) (Fig 2E). This is the first report implying cation- $\pi$  interactions in pore  
191 formation by CDCs and could be relevant to a subgroup including mitilysin, which does not have  
192 the conserved phenylalanine and harbors a lysine at a similar position in  $\beta 4$  (S5B Fig). Structural  
193 analysis of Ply-NH revealed that the Y150H substitution leads to repulsion between two positively  
194 charged residues (H150 and K286), which may destabilize Ply-NH's pre-pore state leading to loss  
195 of its pore forming ability (Fig 2E).

196 Another important substitution in Ply-NH is threonine to isoleucine at position 172. The I172 in  
197 Ply-NH is well defined in the electron density (S4 Fig) and is found to be located at the tip of  
198 TMH1 (Fig 2F). Presence of the polar side chain of T172 in the non-polar pocket of Ply-H likely  
199 makes this region quite unstable, allowing the smooth disengagement from  $\beta 3$  and  $\beta 4$  upon binding  
200 of this toxin to the membrane. On the contrary, I172 in Ply-NH is found to be stabilized through  
201 the hydrophobic interactions involving the side chains of F169, L176, Y247, V288 and L290 (Fig  
202 2F). The interactions from Y247, V288 and L290 might be essential to prevent the disengagement  
203 of these  $\alpha$  helices joining  $\beta 3$  and  $\beta 4$ , to form TMHs for membrane insertion and subsequent pore  
204 formation.

205 We next mutated H150 and I172 back to their respective Ply-H residues (H150Y and I172T) in  
206 the Ply-NH background. Though individual mutations showed some gain of activity, the double

207 mutant (Ply-NH<sup>H150Y+I172T</sup>) regained most of the hemolytic activity (Fig 2G). This clearly  
208 implicates Y150H and T172I as the major mutations responsible for the loss of pore forming ability  
209 of Ply-NH, by preventing disengagement of  $\alpha$  helices joining  $\beta$ 3 and  $\beta$ 4 and subsequent TMH  
210 formation.

### 211 ***Ply-NH is unable to form transmembrane $\beta$ -hairpins (TMH1 and TMH2)***

212 To evaluate this predicted loss of conformational dynamics, TMH1 and TMH2 formation in both  
213 Ply-H and Ply-NH was monitored using the environment sensitive fluorescent dye *N, N'*-dimethyl-  
214 *N*-(iodoacetyl)-*N'*-(7-nitrobenz-2-oxa-1,3-diazol-4-yl) ethylenediamine 7 (NBD). The  
215 fluorescence of NBD-labelled protein remains quenched in water but increases in a non-polar  
216 environment, thereby acting as an indicator of membrane insertion of CDCs. Two residues per  
217 TMH in Ply variants were selected, based on the structural comparison with PFO (1PFO), to  
218 monitor TMH1 and TMH2 formation. The NBD labelled monomers of Ply-H derivatives: S167C  
219 and H184C (TMH1 region) and D257C and E260C (TMH2 region), which retained their hemolytic  
220 properties (S2 Table), showed basal fluorescence emission, but exhibited significant increase in  
221 fluorescence intensity when incubated with cholesterol containing liposomes (Fig 3A-C). NBD-  
222 labelled Ply-NH derivatives: S175C and H184C (TMH1) and D257C and E260C (TMH2),  
223 however, failed to do so (Fig 3D-F), confirming that the inability of Ply-NH to form pores is  
224 primarily due to the structural rigidity of D3, restricting the conformational change required for  
225 the formation of TMHs.

### 226 ***Abrogation of pore forming ability confers improved internalization of SPN into host cells***

227 To compare the interaction of SPN strains harboring Ply variants with host cells *in-vitro*, we first  
228 performed invasion assays in A549 alveolar epithelial cells, using the non-encapsulated derivative

229 of serotype 2 strain D39, R6:Ply-H, that is more readily internalized than its parent strain, and its  
230 allele 5 *ply* mutant R6:Ply-NH (S6A,B and S7A Fig). Our findings revealed a significantly  
231 improved internalization capability of R6:Ply-NH into lung epithelial cells compared to R6:Ply-H  
232 (Fig 4A). Similar increased invasion efficiency was also observed in macrophages (THP-1) (Fig  
233 4B). Primary human pulmonary alveolar epithelial cells (HPAEPiC) were used for testing the  
234 invasive ability of encapsulated strain D39:Ply-H and the allele exchange mutant D39:Ply-NH  
235 (S6C Fig), wherein the later exhibited improved internalization, consistent with the previous  
236 results (Fig 4C). ST306 strain 01-1956 was also demonstrated to invade these primary cells (Fig  
237 4C). To examine whether enhanced internalization was conferred by Ply-NH or was due to loss of  
238 pore forming ability of Ply-H, bacterial invasion assays were repeated following pre-treatment of  
239 A549 cells with a sub-cytotoxic concentration of rPly (S7B Fig). We observed a significant loss  
240 in internalization of R6:Ply-NH in A549 cells following pre-treatment with rPly-H, suggesting a  
241 role of the pore forming ability of Ply in suppression of host cell endocytic pathways (Fig 4D).  
242 Ply-H is known to segregate to lipid rafts (24), and owing to its pore forming ability, we  
243 hypothesized that it might disrupt the lipid raft mediated endocytic pathways, thereby explaining  
244 higher internalization capability of strains harboring Ply-NH. Indeed, treatment of cells with  
245 methyl  $\beta$ -cyclodextrin (M $\beta$ -CD), an inhibitor of lipid raft mediated endocytosis, neutralized the  
246 improved internalization of R6:Ply-NH (Fig 4E and S8A Fig). Next, we checked the segregation  
247 of Ply-NH with the low density lipid raft fraction isolated from A549 membranes, following  
248 sucrose density gradient centrifugation. Although both Ply-H and Ply-NH were observed to  
249 localize to lipid rafts (Fig 4F), only treatment with Ply-H interfered with the uptake of lipid raft  
250 endocytic pathway specific cargo cholera toxin B conjugated latex beads by A549 cells (Fig 4G  
251 and S8B Fig). This implies that the pore forming activity of Ply interferes with lipid raft mediated

252 entry of SPN into eukaryotic cells, whereas its loss facilitates such processes, conferring improved  
253 internalization capability to strains harboring Ply-NH.

254 ***Loss of pore forming ability facilitates prolonged intracellular persistence of SPN***

255 In order to track the fate of SPN strains harboring Ply variants, following entry into host cells, we  
256 performed penicillin-gentamicin protection assays using R6:Ply-H, R6:Ply-NH and R6:Ply-DM (a  
257 recombinant R6 strain where Ply-H is replaced with the Ply-NH<sup>H150Y+I172T</sup> allele which contains  
258 reversion mutations in the form of H150Y and I172T) in A549 cells. Our findings demonstrate  
259 significantly improved survival of R6:Ply-NH compared to R6:Ply-H at all time points, whereas  
260 R6:Ply-DM behaved similarly to R6:Ply-H, indicating that loss of pore forming ability is beneficial  
261 for prolonged intracellular persistence of SPN (Fig 5A). Ability of R6:Ply-NH to persist longer  
262 than R6:Ply-H was also observed inside THP-1 macrophages (Fig 5B).

263 Damage to bacteria-containing endosomal membranes by pore forming agents is known to trigger  
264 autophagic killing, following recruitment of cytosolic “eat me” signals such as galectin-8 (Gal8)  
265 and ubiquitin (Ubq) (25, 26). Immunofluorescence analysis of A549 cells (Fig 5C), following  
266 infection with SPN, revealed that although R6:Ply-H exhibited a high degree of association with  
267 Gal8 ( $26.78 \pm 3.17\%$  at 10 h post infection (h.p.i)) (Fig 5D), R6:Ply-NH failed to co-localize with  
268 Gal8 at all the time points, confirming their residence inside intact vacuoles. Ubiquitination of  
269 R6:Ply-NH was also observed to be negligible compared to a high degree of association observed  
270 with R6:Ply-H ( $29.92 \pm 0.92\%$  at 10 h.p.i) (Fig 5E). Moreover, majority of the Gal8 and ubiquitin  
271 positive R6:Ply-H ( $69.55 \pm 2.81\%$  and  $65.10 \pm 2.25\%$ , respectively) associated with the autophagy  
272 marker LC3, implying targeting of R6:Ply-H towards autophagic killing (Fig 5F,G). Indeed,  
273 R6:Ply-H demonstrated a significantly higher colocalization with Lysotracker™ ( $44.19 \pm 1.75$ ), a

274 dye that stains acidic compartments including lysosomes, compared to R6:Ply-NH ( $30.45 \pm 1.02$ ),  
275 at 18 h.p.i (Fig 5H). Although Ply knockout mutant (R6 $\Delta$ ply) failed to localize with Gal8 or  
276 ubiquitin, a strain expressing a non-hemolytic Ply mutant, R6:Ply<sup>W433F</sup>, colocalized with Gal8  
277 ( $9.71 \pm 0.41\%$ ) and ubiquitin ( $17.26 \pm 0.64\%$ ), albeit to a lesser extent than R6:Ply-H ( $22.81 \pm$   
278  $0.74\%$  for Gal8 and  $36.58 \pm 5.23\%$  for Ubq), at 18 h.p.i (S9 A-C Fig). This was also reflected in  
279 their intracellular survival capabilities, wherein R6 $\Delta$ ply, but not R6:Ply<sup>W433F</sup>, demonstrated  
280 improved survival in A549 cells relative to R6:Ply-H (S9D, E Fig). Association of R6:Ply<sup>W433F</sup>  
281 with Gal8 has also been observed in hBMECs (27), and underscores the fact that loss of hemolytic  
282 activity is not synonymous with loss of pore forming ability (28, 29). Overall, our results suggest  
283 that abrogation of Ply's pore forming ability not only confers improved internalization but also  
284 ensures safe residence of SPN inside host cells for prolonged periods, a switch in lifestyle that may  
285 be necessary for evasion from host immune mechanisms.

286 ***Impairment of hemolytic activity of Ply attenuates virulence and allows host tolerance of SPN***  
287 ***in the lower respiratory tract***

288 Since SPN is typically considered an extracellular pathogen, we sought to determine the  
289 significance of loss of pore forming ability and preference for an intracellular niche in an *in vivo*  
290 infection scenario. We performed survival experiments in a mouse model of pneumonia with  
291 encapsulated D39 carrying a fully hemolytic pneumolysin (D39:Ply-H) and ST306 strain 01-1956,  
292 carrying Ply-NH. Survival experiments revealed a striking difference in the outcome of infection,  
293 with 90% of D39:Ply-H infected mice succumbing to infection within 48 h while only 10% of  
294 ST306 infected mice succumbed during the seven days of the experiment (Fig 6A). Furthermore,  
295 whilst D39:Ply-H infected mice quickly developed visible signs of disease that progressed in  
296 severity up until time of death, ST306 infected mice displayed minimal disease symptoms

297 throughout (S10A Fig). This corroborates the reports of association of ST306 with respiratory  
298 tract infections that are non-lethal in nature (30, 31) and previous studies in mice demonstrating  
299 attenuated virulence in ST306 isolates (31).

300 To determine the contribution of Ply to these phenotypes, we infected mice with D39:Ply-NH, in  
301 which the *ply* gene had been replaced by the allele 5 *ply* from ST306. D39:Ply-NH was  
302 significantly attenuated in virulence as compared to D39:Ply-H, with 50% of the mice surviving  
303 until seven days post-infection (Fig 6A). The median survival times of ST306 (>168 h) and  
304 D39:Ply-NH (132 h) infected mice were significantly higher than that of D39:Ply-H (32 h) infected  
305 animals. Furthermore, visible disease signs developed slowly in D39:Ply-NH infected mice (S10A  
306 Fig). To determine whether the improved survival of mice infected with D39:Ply-NH or ST306  
307 was due to enhanced bacterial clearance and/or reduced bacterial growth, we determined lung  
308 bacterial burdens in mice that survived until the end of the one week experiment and observed  
309 complete SPN clearance in the single D39:Ply-H mouse that survived (Fig 6B). By contrast, the  
310 lungs of 3/5 and 8/10 mice infected with D39:Ply-NH and ST306, respectively, still harbored  
311 moderate CFU burdens at this timepoint (Fig 6B). Thus, improved survival of mice was not  
312 because of complete bacterial clearance but due to the improved tolerance of SPN in the lower  
313 respiratory tract. Although D39:Ply-NH was less virulent and demonstrated persistence relative to  
314 D39:Ply-H, it did not fully recapitulate the phenotype of ST306, indicating the involvement of  
315 other serotype/strain specific factors in the host-pathogen interactions that underpin virulence. This  
316 is demonstrated by the significant difference in survival between mice infected with D39:Ply-NH  
317 and those infected with ST306 ( $p=0.0442$ , Fisher's exact test) (Fig 6A).

318 Since Ply is a key inducer of host inflammation, tissue injury, morbidity and mortality, we analyzed  
319 the inflammatory response in the respiratory tract of mice infected with different SPN strains.

320 Consistent with the findings of others (32), mice infected with D39:Ply-NH and ST306 had  
321 significantly reduced lung inflammation, evident by lower expression of pro-inflammatory  
322 cytokines KC and interleukin-6 (S10C, D Fig) and reduced infiltration of leukocytes (S10E Fig),  
323 principally neutrophils (PMN) (S10F Fig), compared to D39:Ply-H infected animals. Histo-  
324 pathological analysis of lung sections from infected mice revealed similar trends (Fig 6C).

325 The introduction of high numbers of Ply-H expressing pneumococci into the murine lung triggered  
326 strong inflammatory responses which led to the death of majority of animals within the first 48 h,  
327 thus preventing an unbiased time point analysis of D39:Ply-H infected mice with other groups (Fig  
328 6C and Fig S10C-F). Therefore, we next adopted a murine (persistence) infection model, modified  
329 from that of Haste *et al.* (33), which has been shown to induce only low-level, localized  
330 inflammation within the lung instead of the acute inflammatory responses exhibited by the earlier  
331 model. Using this new model, we compared mouse survival (Fig 6D) and bacterial persistence (Fig  
332 6E) of SPN strains expressing the Ply variants. Disease signs and premature mortality was  
333 observed in only a small proportion of those mice infected with D39:Ply-H (2/10) or D39:Ply<sup>W433F</sup>  
334 (2/10), whilst all mice infected with D39:Ply-NH, D39 $\Delta$ *ply* or ST306 survived (Fig 6D). At four  
335 days post infection, total lung CFU was determined in surviving animals (Fig 6E). We recovered  
336 viable SPN from the lungs of all mice infected with D39:Ply-NH, ST306 or D39:Ply<sup>W433F</sup> and 7/8  
337 and 6/8 mice infected with D39:Ply-H or D39 $\Delta$ *ply*, respectively. The highest burdens of lung  
338 pneumococci were present in mice infected with D39:Ply-NH or ST306 (Fig 6E), suggesting that  
339 Ply-NH indeed confers an advantage in lung colonization that is not fully explained either by loss  
340 of Ply-induced inflammatory responses (comparison with D39 $\Delta$ *ply*), or by loss of Ply hemolytic  
341 activity (comparison with D39:Ply<sup>W433F</sup>). Taken together, these results suggest that Ply-NH, aided



342 by loss of its pore forming ability, promotes longer persistence of SPN in the lower respiratory  
343 tract and a relatively benign association with the host.

344 ***ST306 favors an intracellular niche in the lower respiratory tract***

345 The comparatively innocuous association of Ply-NH harboring SPN in the host lower respiratory  
346 tract was further analyzed by electron microscopic analysis (SBF-SEM and TEM) of lung sections  
347 from SPN-infected mice. For this experiment, we used the acute infection model, administering  
348  $1.5 \times 10^6$  CFU in 50 $\mu$ l saline, to maximize dispersal of pneumococci throughout the lung.  
349 Intracellular ST306 were observed in multiple SEM sections, throughout lungs of mice harvested  
350 at 24 h.p.i (Fig 6F and S11A-F Fig). None were observed in D39:Ply-H infected mouse lungs and  
351 no comparable structures were seen in the uninfected control. This finding supports our *in vitro*  
352 observations that Ply-NH harboring SPN can adopt an intracellular lifestyle. This was further  
353 substantiated when we compared SPN numbers in lung lavages (containing planktonic or weakly  
354 adherent SPN) to those in post-lavage lung tissue homogenates (containing intracellular or strongly  
355 adherent SPN) in the bacterial persistence model. At 2 days post-infection (chosen since total lung  
356 CFU in all groups were comparable at this timepoint), 2/5 D39:Ply-NH infected mice and 3/5  
357 ST306 infected mice had a higher number of bacteria in post-lavage tissue homogenates than in  
358 the lavage itself (Fig 6G). By contrast, all mice infected D39:Ply-H, D39:Ply<sup>W433F</sup> or D39 $\Delta$ *ply* had  
359 higher numbers of bacteria in lavage than in post-lavage lung homogenates.

## 360 **DISCUSSION**

361 One outcome of arms race driven host-pathogen interactions is Pyrrhic victory for the host, with  
362 its defence mechanisms eliminating the pathogen at the cost of inflicting lethal injury to itself.  
363 From the pathogen's perspective, this represents an infection bottleneck, limiting transmission, a  
364 problem particularly acute for obligate symbionts - such as SPN – that lack an alternate reservoir.  
365 The potential dead end that this mode of interaction presents, however, can drive co-evolution of  
366 pathogen and host into a stalemate like situation. This is referred as “disease tolerance”, wherein  
367 the microbe modulates its virulence to persist in a healthy host, whilst limiting the antagonistic  
368 response being mounted against it (2). The interaction of SPN ST306 with the host observed in  
369 our study fits this mould, wherein mice infected with SPN ST306 showed prolonged survival in  
370 acute infection, despite residual bacterial burden in the lungs. The phenotype was also  
371 recapitulated, albeit to a lesser extent, with mice infected with D39:Ply-NH, which demonstrated  
372 extended survival versus those infected with D39:Ply-H. Furthermore, in a lower virulence  
373 persistence infection model, Ply-NH harbouring strains (D39:Ply-NH and ST306) colonised the  
374 lungs at a higher density than those expressing Ply-H.

375 Five out of six mutations that distinguish Ply-NH from Ply-H are also present in *ply* allele 3 (found  
376 in serotype 8 ST404 and ST944 isolates) that exhibits residual hemolytic activity (~1.8%) (11),  
377 implying that this variant retains its pore forming ability. However, the additional substitution of  
378 the Y150 residue (conserved across all CDCs) with histidine, is unique to Ply-NH and is primarily  
379 responsible for its complete loss of pore forming ability. Interestingly, our data indicate that Y150  
380 engages in a novel cation- $\pi$  interaction with lysine (K288) in Ply-H to facilitate pore formation,  
381 contrary to the established  $\pi$ - $\pi$  interaction demonstrated in other CDCs (23). Hence, such toxins

382 (e.g., pneumolysin and mitilysin) should be considered as a new class of CDC (S1 Fig). Loss of  
383 this essential cation- $\pi$  interaction owing to Y150H substitution, combined with the conformational  
384 rigidity of domain D3 imparted by I172, were found to be the major contributors to the loss of pore  
385 forming ability of Ply-NH. Consistent with this, a single Y150A substitution in Ply-H has been  
386 reported to reduce its hemolytic activity to 0.2% (34). It is intriguing that subtle alterations  
387 introduced by the point mutations are sufficient to effectively influence the intra and inter-  
388 molecular interactions, rendering Ply-NH non-functional. From an evolutionary perspective, this  
389 is probably more favourable, as new traits can emerge in a short span without inflicting gross  
390 changes in the protein structure.

391 These minor changes in Ply sequence had a profound effect on the lifestyle of SPN. Electron  
392 microscopic analysis of mouse lung sections, performed to further characterize the benign  
393 association of Ply-NH carrying SPN with the host, revealed presence of bacteria inside host cells.  
394 Comparison of SPN CFU in lung lavages to that in post-lavage lung tissue homogenates also  
395 suggested an increased propensity of Ply-NH containing SPN to embrace an intracellular life. This  
396 was aided by a significantly improved capability of Ply-NH harbouring SPN to invade host cells,  
397 which was abrogated upon treatment with Ply-H or M $\beta$ -CD, an inhibitor of lipid raft mediated  
398 endocytosis, suggesting a role for Ply-H in the disruption of lipid raft dependent host endocytic  
399 pathways. Indeed Ply-H, but not Ply-NH, reduced the cellular internalization of cholera toxin  
400 coated latex beads, which enter cells specifically through a lipid raft mediated pathway. Recent  
401 studies have described increased affinity of Ply towards cholesterol rich domains (35) and calcium  
402 signalling triggered shedding of damaged membrane patches as a repair mechanism for Ply-created  
403 pores on plasma membranes (36). Integrating our findings with these reports, we propose that the  
404 attempt of SPN to enter host cells is thwarted by Ply-H in its vicinity that forms pores on lipid

405 rafts. This elicits shedding of the damaged membrane section, preventing pneumococcal entry via  
406 the lipid raft mediated pathway. Following internalization, pore forming toxins or bacterial  
407 secretion systems can damage the bacteria-containing vacuole, resulting in bacterial clearance via  
408 induction of autophagy that sequesters damaged bacteria-containing vacuoles in double membrane  
409 structures and fuses them with lysosomes (25). Our study demonstrates that loss of pore forming  
410 ability of Ply-NH provides an intracellular survival advantage to SPN, by enabling it to evade anti-  
411 bacterial autophagy. Additional factors that sustain a prolonged life of SPN inside intact endocytic  
412 vacuoles, however, remain elusive and require further investigation. Thus, abrogation of Ply pore  
413 forming ability not only confers improved internalization but also ensures safe residence of SPN  
414 inside host cells. This is contrary to the general notion of SPN as an extracellular pathogen, but  
415 consistent with recent observations of its intracellular replication inside splenic macrophages and  
416 cardiomyocytes (37, 38). It is interesting to note that Ply-NH harbouring strains (D39:Ply-NH and  
417 ST306) demonstrated an added advantage in persistence in the lungs over D39 $\Delta$ *ply*, in our *in vivo*  
418 mouse infection model, suggesting a contribution of Ply-NH to the persistence phenotype that is  
419 not explained solely by the loss of its pore forming ability.

420 Collectively, our findings suggest that Ply-NH, aided partly by loss of its pore forming ability,  
421 enables host tolerance of SPN by minimising inflammation and thereby damage to both pathogen  
422 and host. Additionally, it promotes an intracellular lifestyle for SPN, enabling it to explore novel  
423 niches inside the host (Fig 7). This latter feature is likely an adaptation to the selection pressures  
424 exerted by host defences, amplified by manmade interventions in the form of vaccinations and  
425 antibiotics (39). The need for an alternate niche is particularly relevant in the context of serotype  
426 1 SPN, as unlike other serotypes, it has a limited asymptomatic carriage phase in the nasopharynx,  
427 the primary biological reservoir of SPN (40). The “virulence trade-off” theory suggests that a

428 pathogen can continue to maintain virulence as long as its transmission is uncompromised (41).  
429 Possession of Ply-H thus presents a virulence-transmission conundrum to SPN, as Ply-H mediated  
430 inflammation is key for host to host transmission (10). This likely explains the retention of Ply-H  
431 in other serotypes, which have a significant nasopharyngeal colonization phase in their lifecycle  
432 and a mode of transmission solely dependent on it. For these serotypes, progression to invasive  
433 disease and the associated risk of host mortality would be a dead-end for transmission (3).  
434 Accordingly, isolates harbouring Ply-NH cannot afford to be completely avirulent, as the mild  
435 respiratory tract infections they cause are likely essential to propel SPN transmission, probably in  
436 the form of coughs and sneezes. Studies indicating clonal expansion of ST306 within serotype 1  
437 and its notable association with disease outbreaks (11) confirm that the loss of pore forming ability  
438 of Ply has not interfered with their transmission ability. Indeed, the association with outbreaks may  
439 imply that the primary transmission route is disease-dependent, rather than occurring during  
440 asymptomatic nasopharyngeal carriage. It would also be interesting to explore if ST306 adopts an  
441 intracellular life in the nasopharyngeal epithelium which would make its detection difficult in nasal  
442 swabs or washes, thus making the low prevalence of ST306 carriage an artefact of sampling  
443 methods.

444 Nasopharyngeal colonization that precedes invasive disease also provides the platform for intra  
445 and inter species interaction of SPN, thereby enabling acquisition and incorporation of genetic  
446 material via recombination to expand its virulence repertoire (42, 43). Given that recombination  
447 rather than mutation is the major force driving evolution of adaptive traits in SPN (44), defects in  
448 colonization and transformation might confer genetic stability, a commensal-like feature. Indeed,  
449 serotype 1 SPN are characterized by a rare, or short colonization phase (31) and poor  
450 transformability (45, 46), thereby limiting avenues for expansion of genetic diversity, evident by

451 lack of antibiotic resistance traits (47). Additionally, Lineage A of serotype 1 SPN harbours  
452 isolates expressing non-hemolytic Ply (belonging to ST306, ST617, ST228) or variants with  
453 reduced hemolytic activity (ST227-allele 4, ST228-allele 5, 14) (11). These isolates in particular,  
454 are associated with high disease potential, but in contrast to most other SPN, they act as primary  
455 pathogens, infecting healthy individuals and are usually associated with low mortality rates (30).  
456 Integrating this with our findings prompts us to speculate that this subset of SPN might be evolving  
457 towards a commensal-like lifestyle within the human host (like other members of the Mitis group  
458 of Streptococci), in an alternate niche, by adopting an intracellular lifestyle. Loss of pore forming  
459 ability of Ply is a decisive step in this direction, contributing to the expansion and success of these  
460 isolates.

## 461 **MATERIALS AND METHODS**

### 462 **Mice**

463 All mouse infection work was performed at the University of Liverpool with prior approval by the  
464 UK Home Office and the University of Liverpool Ethics Committee (License Number  
465 PB6DE83DA). Mice were randomly assigned to a cage (experimental group) on arrival at the unit  
466 by staff with no role in study design. Female CD1 or CBA/Ca mice of 6-8 weeks of age (Charles  
467 River, UK) were used for infection experiments and housed in individually ventilated cages for  
468 one week to acclimatize prior to infection.

### 469 **Cell culture**

470 Human lung alveolar carcinoma (type II pneumocyte) cell line A549 (ATCC No. CCL-185) was  
471 cultured in DMEM (HiMedia) supplemented with 10% fetal bovine serum (FBS, Gibco) at 37°C  
472 and 5% CO<sub>2</sub>. THP-1 monocytes (kind gift from Sarika Mehra, IIT Bombay, India) were cultured  
473 in RPMI supplemented with 10% FBS at 37°C and 5% CO<sub>2</sub>. For differentiation into macrophages,  
474 THP-1 monocytes were treated with 25 ng/ml Phorbol 12-myristate 13-acetate (PMA, Sigma) for  
475 24 h followed by resting in fresh media for another 24 h. Primary human pulmonary alveolar  
476 epithelial cells (HPAEpiC) were obtained from ScienCell Research Laboratories (Cat. No. 3200)  
477 and were cultured in Alveolar Epithelial Cell Medium (AEpiCM, ScienCell Cat. No. 3201).

### 478 ***Streptococcus pneumoniae* strains**

479 *Streptococcus pneumoniae* strains ST306 strain 01-1956 (encapsulated, serotype 1), D39  
480 (encapsulated, serotype 2), R6 (unencapsulated derivative of D39) and TIGR4 (encapsulated,  
481 serotype 4) were routinely grown in Todd Hewitt broth supplemented with 1.5% yeast extract  
482 (THY) at 37°C and 5% CO<sub>2</sub>. For all *in vitro* studies, R6 and its derivatives were used (unless  
483 mentioned otherwise) since capsule is reported to inhibit cellular adherence and internalization

484 (48). *ply* allelic variants were constructed in the genetic background of D39/R6 and not ST306, as  
485 isolates belonging to serotype 1 are generally non-transformable *in vitro* (46). For the construction  
486 of SPN:Ply-NH, *ply* ORF of D39/R6 was replaced with *ply-NH* using a cassette containing the *ply-*  
487 *NH* ORF (amplified from ST306 01-1956 genome) and a spectinomycin resistance cassette  
488 (amplified from pUCSpec, gift from I Biswas, KUMC, USA) flanked by *ply* upstream and  
489 downstream regions assembled in pBSK vector. Following transformation of SPN with linearized  
490 plasmid using competence stimulating peptide 1 (CSP 1) (GenPro Biotech), recombinants were  
491 selected using spectinomycin (100 µg/ml) and gene replacement was confirmed by sequencing,  
492 hemolysis and western blot. SPN:Ply-H was similarly constructed by replacing *ply* ORF with *ply-*  
493 *H* ORF and a spectinomycin resistance cassette and was used in place of SPN WT, to account for  
494 any unforeseen effects of recombination (49). R6:Ply-DM was similarly constructed following  
495 amplification of *ply-NH*<sup>H150Y+I172T</sup> ORF (created by site directed mutagenesis as described later).  
496 SPN $\Delta$ *ply* was generated following transformation with a construct containing the spectinomycin  
497 resistance cassette flanked by *ply* upstream and downstream regions. SPN:Ply<sup>W433F</sup> was  
498 constructed as described in (27). GFP and RFP variants of SPN strains used for  
499 immunofluorescence microscopy studies were generated by transformation with *hlpA-*  
500 GFP/tagRFP cassette (gift from J-W Veening, Univ. of Lausanne, Switzerland) and selected using  
501 chloramphenicol (4.5 µg/ml), followed by confirmation with fluorescence microscopy (50). All  
502 gene replacements were verified by PCR and DNA sequence analysis of the respective gene loci.  
503 Ply expression and activity in the generated strains were checked by western blot/ELISA and  
504 hemolysis assay, respectively (S6 Fig). A list of all the SPN strains used in this study is  
505 summarized in S3 Table.

## 506 **Antibodies and reagents**



507 Primary antibodies used for immunofluorescence microscopy were anti-Transferrin (PA3-913,  
508 Pierce), anti-FITC (31242, Invitrogen), anti-Gal8 (AF1305, R&D Systems), anti-Ubiquitin (BML-  
509 PW8100, Enzo Life Sciences), anti-LC3 (4108, CST) and anti-LAMP1 (9091, CST). Anti-serum  
510 against SPN Enolase was a gift from S Hammerschmidt (University of Greifswald, Germany).  
511 LysoTracker™ Deep Red (L12492, Invitrogen), a fluorescent acidotropic dye was used to label  
512 lysosomes. For Ply western blot and ELISA, sc-80500 (Santacruz) and ab71811, ab71810  
513 (Abcam), respectively, were used. Flow cytometry of mouse lung cells was performed with  
514 antibodies from Biolegend, including unconjugated anti CD16/32 (Fc-block) (156603), anti-CD45  
515 FITC (103107), anti-Ly6G/Ly-6C (Gr1) PE/Cy7 (108415) and anti-F4/80 APC (123115). Phorbol  
516 12-myristate 13-acetate (P8139), human transferrin (T8158), cholera toxin B subunit (CtxB)-FITC  
517 conjugate (C1655), methyl- $\beta$ -cyclodextrin (M $\beta$ -CD, C4555) and chlorpromazine hydrochloride  
518 (CPZ, C8138) were procured from Sigma.

### 519 **Protein expression and purification**

520 The genes encoding Ply-H and Ply-NH were amplified from the genomic DNA of TIGR4 and  
521 ST306 01-1956, respectively and cloned into NdeI and XhoI sites of pET28a vector. Variants of  
522 Ply were generated by site-directed mutagenesis using respective plasmids as templates and  
523 appropriate primers (S4 Table). Ply variant constructs as well as their mutants were verified by  
524 DNA sequencing. Recombinant plasmids encoding Ply-H and Ply-NH with N-terminal His-tag  
525 were transformed into *E.coli* BL21 (DE3) cells for protein expression. Freshly transformed  
526 colonies were grown in Luria Bertani (LB) broth containing 50  $\mu$ g/ml kanamycin at 37°C on a  
527 shaker incubator for 12 h. 1% of the primary culture was added to 1 L of LB broth and incubated  
528 at 37°C on a shaker incubator till the OD<sub>600nm</sub> reached between 0.6-0.8. Protein expression was  
529 induced by the addition of 400  $\mu$ M isopropyl-1-thiogalactopyranoside (IPTG) and growing the

530 culture further at 22°C for 5-6 h with agitation at 150 rpm. The cells were harvested by  
531 centrifugation at 6,000 rpm for 10 min at 4°C. The cell pellet was resuspended in buffer A (25 mM  
532 Tris, pH 8.0 and 300 mM NaCl) and lysed by sonication. Cell debris was separated by  
533 centrifugation (14,000 rpm, 50 min, 4°C) and supernatant was applied on to a 5 ml His-Trap  
534 column, equilibrated with buffer A. The column was washed with 10 column volumes of buffer A  
535 and Ply was eluted by linear gradient of imidazole from 0 to 250 mM in buffer A. His tag was  
536 removed by treatment with TEV protease (gift from AK Varma, ACTREC, India). Subsequently,  
537 Ply fractions were concentrated (2 ml) and applied on to a superdex-200 16/60 gel filtration column  
538 which was pre-equilibrated with buffer B (25 mM Tris, pH 8.0, 100 mM NaCl). Ply was eluted at  
539 a flow rate of 0.5 ml per min and the purity was analyzed using SDS-PAGE. The fractions  
540 containing Ply were pooled and concentrated up to 6 mg/ml using 10 kDa molecular weight cut  
541 off filter by centrifugation at 4,700 rpm at 4°C. All the mutants of Ply were expressed and purified  
542 using this procedure. Presence of native folding in all the variants was confirmed by circular  
543 dichroism (CD) experiments.

#### 544 **Crystallization of Ply-NH**

545 The concentrated (6 mg/ml) solution of Ply-NH was used for crystallization. Initial crystallization  
546 screening was performed by sitting drop vapor diffusion method using different commercial  
547 screens at various temperatures (4, 18 and 22°C). The needle like crystals appeared within 24 h in  
548 several conditions. Few conditions were identified for optimization. The crystal growth was further  
549 optimized by varying the precipitant and MgCl<sub>2</sub> concentration to get better diffracting quality  
550 crystals. The best quality Ply-NH crystals appeared in the crystallization drops comprised of 1 µl

551 of Ply-NH plus 1  $\mu$ l of precipitant solution containing 6 mM phosphocholine, 0.2 M  $MgCl_2$  and  
552 20% PEG 3350.

### 553 **Diffraction data collection, structure solution and refinement**

554 The crystals were cryoprotected with mother liquor supplemented with 30% glycerol and flash  
555 frozen in liquid  $N_2$  at 100 K prior to performing X-ray diffraction experiments. The complete data  
556 set was collected at BM-14 beam line at the European Synchrotron Radiation Facility (ESRF),  
557 France. A total of 300 frames, with a  $1.0^\circ$  rotation of the crystal per frame, were collected at a  
558 crystal-to-detector distance of 213 mm and with an exposure time of 8 s. Diffraction data were  
559 indexed, integrated and scaled by XDS software (51). Systematic absence probability indicated  
560 that the crystal belonged to space group P212121 with cell dimensions  $a = 24.5$ ,  $b = 84.7$  and  $c =$   
561  $214.6 \text{ \AA}$ . Calculation of Matthews' coefficient (52) indicated presence of one molecule in the  
562 asymmetric unit. The initial phases were obtained by molecular replacement method by program  
563 PHASER (53), using structure of Ply (PDB ID: 5CR6) as search model. Refinement of the model  
564 was performed by REFMAC5 (54) and PHENIX (55). During the process of refinement, the  
565 manual model building was done by visual inspection of the electron density in COOT (56). Water  
566 and other solvent molecules were added to the structure using COOT. Convergence of the  
567 refinement process was monitored by the decrease of  $R_{free}$  and improvement of the overall  
568 stereochemistry. Final refinement of the complete model was performed with REFMAC5 and  
569 stereochemistry of the residues were analyzed using PROCHECK (57). Data collection and

570 refinement statistics are shown in S1 Table. All structure related figures were prepared using  
571 PyMOL (58). The Ply-NH structure have been deposited in PDB under ID code 6JMP.

### 572 **Homology modelling of the pore-state of the CDCs**

573 The homology models of the pore-state of Ply-NH and mitilysin were developed using the cryo-  
574 electron microscopy structure of Ply-H (PDB ID: 5LY6) (18) using the automated model building  
575 server SWISS-MODEL (59). The sequence identity of Ply-NH and mitilysin with Ply-H are  
576 97.87% and 97.88%, respectively. Both the generated models have good stereochemistry as they  
577 have more than 95% residues in the allowed regions of the Ramachandran plot.

### 578 **Hemolysis assay**

579 Red blood cells (RBCs) from 1 ml of sheep blood were washed and resuspended in 50 ml PBS  
580 (pH 7.4) to get 2% (v/v) RBC suspension. 100  $\mu$ l of protein samples or crude cell lysates diluted  
581 to desired concentrations in PBS were added to 96 well plate containing 50  $\mu$ l DTT (10 mM) and  
582 50  $\mu$ l RBCs. After 60 min of incubation, the plates were centrifuged at 200 g for 10 min and  
583 absorbance of the supernatant was measured at 405 nm using a microplate spectrophotometer  
584 (Thermo Fischer Scientific). PBS and triton X-100 (0.05%) were used as negative and positive  
585 control, respectively. For cholesterol inhibition assay, the protein samples (0.1  $\mu$ M) were pre-  
586 treated with different concentrations of cholesterol for 30 min at room temperature (RT) before  
587 adding into the wells containing RBCs.

### 588 **Western blotting**

589 0.01  $\mu$ M Ply was pre-treated with 50  $\mu$ M cholesterol for 30 min at RT. 100  $\mu$ l of this mixture was  
590 added to 50  $\mu$ l of resealed RBC ghost membrane suspension (60) containing DTT (10 mM) and  
591 incubated for 30 min at 37°C. The membrane was pelleted, washed 3 times in PBS and finally  
592 resuspended in 20  $\mu$ l SDS loading buffer. Proteins were separated on 12% SDS-PAGE gel and

593 following transfer to nitrocellulose membrane and incubation with anti-Ply antibody, the blot was  
594 visualized by chemiluminiscence using ECL reagent (BioRad).

595 To check for oligomerization, a modified protocol from Taylor *et al.* was adopted (16). Briefly,  
596  $10^6$  A549 cells were incubated with 0.5  $\mu\text{g}$  Ply variants in PBS for 30 min at  $37^\circ\text{C}$  followed by  
597 addition of 2X SDS loading buffer (100 mM Tris-HCl, 200 mM DTT, 4% w/v SDS, 0.2%  
598 bromophenol blue, 20% v/v glycerol). Proteins were separated on 5% SDS-PAGE gel (without  
599 boiling) followed by immuno-blotting with anti-Ply antibody and the blots were visualized using  
600 ECL reagent.

### 601 **Liposome preparation**

602 The liposomes were prepared by thin film hydration method (61). Briefly, 50 mol% each of  
603 cholesterol and phosphatidylcholine (POPC) were mixed in chloroform:methanol (2:1, v/v)  
604 solution and the lipid mixture was subsequently dried in a rotary evaporator (Buchi) under vacuum  
605 for 3 h at  $40^\circ\text{C}$  to form a thin film. Dried lipid layers were hydrated in buffer A (50 mM HEPES,  
606 pH 7.5 and 200 mM NaCl) and unilamellar liposomes were prepared at RT ( $\sim 24^\circ\text{C}$ ) using an  
607 extruder fitted with a polycarbonate filter of 0.2  $\mu\text{m}$  pore diameter.

### 608 **Calcein leakage assay**

609 For encapsulation of calcein in unilamellar liposomes, 20  $\mu\text{M}$  of calcein was dissolved in buffer  
610 A and used for hydration of thin film as described above. The calcein dye was encapsulated by 8  
611 freeze thaw cycles which involved freezing in liquid nitrogen for 3 min and subsequent thawing  
612 at RT ( $\sim 24^\circ\text{C}$ ) with sonication for 2 min. Calcein loaded unilamellar vesicles were prepared by  
613 extrusion as described above. The free/unencapsulated dye was separated from the liposomes by  
614 passing the extruded lipids through Sephadex G-50 column (1.5 x 50 cm) equilibrated with HEPES  
615 buffer (10 mM HEPES, 160 mM NaCl, pH 7.0). Following purification, 185  $\mu\text{l}$  of protein samples

616 diluted to desired concentration was added to 15  $\mu$ l of calcein encapsulated liposomes and the  
617 fluorescence intensity of the released calcein ( $\lambda_{ex}$ = 495 nm,  $\lambda_{em}$ = 515 nm) was measured every min  
618 for a period of 30 min using a fluorescence spectrometer (Jasco FP-8300) maintained at 37°C.  
619 0.1% triton X-100 was used for complete lysis of the liposome and release of encapsulated calcein.

## 620 **TEM analysis**

621 Freshly prepared liposomes (2 mg/ml) were incubated with purified Ply (0.5  $\mu$ M) at 37°C for 30  
622 min, transferred to copper grids and stained with 2 % phosphotungstic acid (PTA). The grids were  
623 visualized using transmission electron microscope (Philips CM200) operated at 200 kV and the  
624 images were analyzed in Image J software.

## 625 **Labelling of cysteine substituted Ply variants with NBD dye and fluorescence measurements**

626 Cysteine free Ply variants (Ply-H<sup>C428A</sup> and Ply-NH<sup>C426A</sup>) were created by site-directed mutagenesis  
627 (62). Two residues per TMH were selected based on the structural comparison with PFO (1PFO)  
628 to monitor the TMH1 and TMH2 formation. Residues S167, H184, D257 and E260 in Ply-H<sup>C428A</sup>  
629 and S175, H184, D257 and E260 in Ply-NH<sup>C426A</sup> were individually mutated to cysteine. These  
630 protein variants were expressed with His-tag and purified as described earlier. Following  
631 purification, 50  $\mu$ M of mutant proteins were incubated with ten times higher concentration of N,  
632 N'-dimethyl-N-(iodoacetyl)-N'-(7-nitrobenz-2-oxa-1,3-diazol-4-yl) ethylenediamine 7 (NBD) at  
633 22°C for 2 h. After quenching the reaction with DTT (5 mM), free/unlabelled dye was separated  
634 by passing the reaction mixture through a Sephadex G-50 column pre-equilibrated with buffer B.  
635 The extent of labelling was determined by measuring the absorbance at 478 nm with extinction  
636 coefficient 25,000 M<sup>-1</sup> cm<sup>-1</sup>. The cysteine substitutions and NBD labelling retained nearly >90%  
637 of the hemolytic activity in case of Ply-H. In Ply-NH, labelling with NBD also did not alter its  
638 hemolytic activity (S2 Table). NBD labelled Ply variants (200 nM) were incubated with 50  $\mu$ l of

639 liposomes (2 mg/ml) at 37°C for 40 min to ensure oligomerization and insertion of TMHs in the  
640 membrane. All fluorescence intensity measurements ( $\lambda_{\text{ex}}= 468 \text{ nm}$ ,  $\lambda_{\text{em}}= 500\text{-}600 \text{ nm}$ ) of the  
641 labelled protein variants were carried out at 37°C, in buffer B with or without incubation with  
642 liposomes, using a spectrofluorimeter (Jasco FP-8300).

#### 643 **Penicillin-gentamicin protection assay**

644 SPN strains grown until  $\text{OD}_{600\text{nm}}$  0.4 were pelleted, resuspended in PBS (pH 7.4) and diluted in  
645 assay medium for infection of A549 or primary human pulmonary alveolar epithelial cell  
646 monolayers at multiplicity of infection (MOI) of 10. Following 1 h of infection, the monolayers  
647 were washed and incubated with assay medium containing penicillin (10  $\mu\text{g/ml}$ ) and gentamicin  
648 (400  $\mu\text{g/ml}$ ) for 2 h to kill extracellular SPN. Following this, cells were lysed with 0.025% triton  
649 X-100 and the lysate was plated on Brain Heart Infusion agar to enumerate viable SPN. For  
650 infection of THP-1 macrophages,  $5 \times 10^5$  cells were infected with an MOI of 1 (for invasion assay)  
651 or 0.1 (for intracellular survival assay) for 20 min followed by incubation in antibiotic containing  
652 medium for 1 h. Percentage invasion (internalization) was calculated as (CFU in the lysate / CFU  
653 used for infection) $\times 100$ . For intracellular survival assays, the lysates were collected at different  
654 time points post antibiotic treatment and the CFU recovered were expressed as % of the CFU  
655 recovered at 0 h. The MOIs chosen were such that it did not affect the host cell viability during the

656 entire course of the experiment (S7 Fig). For inhibition studies, A549 cells were treated before (1  
657 h) as well as during infection with either Ply-H/Ply-NH (0.1  $\mu\text{g}/\text{ml}$ ) or M $\beta$ -CD (3 and 5 mM).

### 658 **Cytotoxicity assay**

659 Cytotoxic effect of Ply variants or SPN strains were determined by MTT assay as per  
660 manufacturer's (HiMedia) instructions.

### 661 **Preparation of FITC-cholera toxin B subunit coated latex beads**

662 50  $\mu\text{l}$  of latex bead suspension (1.1  $\mu\text{m}$ , Sigma) was incubated with 25  $\mu\text{g}$  of CtxB-FITC in  
663 coupling buffer (50 mM MES, pH 6.1, 200 mM NaCl) overnight at 4°C with shaking. After  
664 washing to remove unbound toxin, coated beads were blocked in 1% bovine serum albumin (BSA)  
665 and stored in 4°C.

### 666 **Immunofluorescence**

667 A549 monolayers grown on coverslips were infected with SPN as described earlier at MOI of 25.  
668 For control experiments using endocytic pathway cargo, cells were incubated with transferrin (100  
669 ng/ml) or CtxB-FITC (500 ng/ml) for 5 min and 15 min, respectively. Cells were treated before (1  
670 h) as well as during cargo incubation with endocytic pathway specific inhibitors M $\beta$ -CD (5 mM)  
671 or CPZ (15  $\mu\text{M}$ ). For latex bead uptake experiment, CtxB-FITC coated beads were added at a cell  
672 to bead ratio of 1:10 for 1.5 h.

673 At required time point post infection, the cells were fixed with 4% paraformaldehyde (PFA) for  
674 15 min or methanol at -20°C for 10 min (for ubiquitin). For PFA fixed samples, cells were  
675 permeabilized using 0.1% triton X-100 for 10 min. Following blocking in 3% BSA for 2 h, cells  
676 were treated with primary antibody for overnight at 4°C. After treatment with secondary antibody  
677 at RT for 1 h, coverslips were finally mounted using Vectashield with DAPI (Vector laboratories).  
678 For quantitation of SPN association with autophagy/ lysosome markers, either fluorescently



679 labelled SPN were used for infection or stained with anti-Enolase antibody post-fixation. To  
680 selectively label extracellular cargo/ beads/ SPN, blocking and antibody treatments were given  
681 prior to permeabilization.

682 Images were acquired with an oil immersion Plan-Apochromat 63X/1.4 NA objective of a confocal  
683 laser scanning microscope (Zeiss Axio-Observer Z1). Images were acquired after optical  
684 sectioning and then processed using ZEN lite software (Version 5.0). For quantitation, at least 100  
685 intracellular bacteria per coverslip were counted in triplicates.

### 686 **Isolation of lipid rafts by sucrose density gradient centrifugation**

687  $5 \times 10^6$  A549 cells were collected, resuspended in 1 ml Tris buffered saline (TBS) and incubated  
688 with 25  $\mu\text{g}$  of Ply variants or CtxB-FITC (+ve control, 5  $\mu\text{g}$ ) or transferrin (-ve control, 5  $\mu\text{g}$ ) in  
689 ice for 4 h. 40  $\mu\text{l}$  of 25% triton X-100 was added to the mixture (final concentration 1%) and  
690 incubated in ice for 1 h. The sample was passed 20 times through 26<sup>1/2</sup> gauge needle and  
691 centrifuged at 10,000 g for 5 min to remove cell debris (24). The supernatant was adjusted to 40%  
692 sucrose (in 3 ml), and overlaid with 6 ml of 30% and 3 ml of 5% sucrose (w/v) followed by  
693 centrifugation at 32,000 rpm in SW41 rotor (Beckman Coulter) for 20 h. At the end of the run, 1  
694 ml fractions were collected from the top and 5  $\mu\text{l}$  of each fraction was spotted on nitrocellulose  
695 membrane. After allowing to air-dry, the membrane was probed with either anti-Ply, anti-  
696 transferrin or anti-FITC antibody and the blot was visualized using ECL reagent (Bio-Rad).

### 697 **Mouse infections**

698 For survival and time point pneumonia mouse experiments in acute infection model, CD1 mice  
699 were infected with  $1.5 \times 10^6$  CFU of SPN in 50  $\mu\text{l}$  PBS via intranasal administration under light  
700 anaesthesia with a mix of oxygen and isoflurane. For survival and time point experiments in the  
701 persistence mouse model, CBA/Ca mice were infected with  $1 \times 10^6$  CFU of SPN in 30  $\mu\text{l}$  PBS via

702 intranasal administration. This protocol was adapted from that described by Haste *et al* (33). Mice  
703 were monitored for signs of disease; pain score was determined using the scheme of Morton (63)  
704 and animals were culled at pre-determined time points or if they reached the experimental endpoint  
705 (lethargy). Lung samples were taken and homogenized using an Ultra-Turrax T8 homogenizer  
706 (IKA). Pneumococcal CFU was determined via Miles and Misra dilution onto blood agar plates  
707 containing 1 µg/ml of gentamicin. For experiments comparing lavage and tissue CFU, lungs were  
708 perfused five times with 1 ml ice-cold PBS containing 1 mM EDTA to collect lavage fluid. Lungs  
709 were then removed by dissection and processed as described above.

#### 710 **Cytokine measurements (enzyme-linked immunosorbent assay)**

711 Mouse CXCL1/KC and interleukin-6 concentrations in lung homogenates from infected mice were  
712 determined using DuoSet® ELISA kits (R&D Systems, UK) according to manufacturer's  
713 instruction. A 1:5 dilution was used for all lung homogenates analyzed.

#### 714 **Ply ELISA**

715 96-well ELISA microplates (Corning Laboratories, Corning, NY) were coated overnight at 4°C  
716 with 1 µg/well mouse anti-Ply (PLY-4) antibody (Abcam). After washing, plates were blocked for  
717 2 h, washed again and 100 µl of bacterial lysate (prepared from 10<sup>7</sup> CFU SPN from frozen stocks)  
718 was added for 2 h. After washing, 1 µg/well rabbit anti-Ply polyclonal antibody (Abcam) in 100  
719 µl of diluent was added for 2 h. Plates were washed, and goat anti-rabbit-alkaline phosphatase  
720 antibody (Abcam) was added for 30 min. After washing, 250 µl/well pNPP color reagent (Sigma)

721 was added for 15 min before the reaction was stopped with 50  $\mu$ l of 3 N NaOH. Absorbance at 405  
722 nm was measured with a Multiskan Spectrum microplate reader (Thermo Scientific).

### 723 **Flow cytometry**

724 Single cell suspensions were prepared from excised mouse lungs and RBCs were lysed using RBC  
725 lysis buffer (Biolegend), according to manufacturer's instructions. Cell suspensions in PBS were  
726 incubated with purified anti-Fc receptor blocking antibody (anti-CD16/CD32) for 15 min at RT  
727 before addition of fluorochrome-conjugated antibodies against cell surface markers and incubation  
728 for 30 min at RT, in the dark. Cells were then washed and resuspended in 300  $\mu$ l PBS and data  
729 acquisition performed on a Becton Dickinson FACS Canto II flow cytometer running FACSDiva  
730 acquisition software. Samples were analyzed using FlowJo software (version 8.8.3, Tree Star).  
731 Cell populations were defined as follows: leukocytes CD45<sup>+</sup> and neutrophils CD45<sup>+</sup>Gr-  
732 1<sup>high</sup>F4/80<sup>low</sup>/neg. The appropriate isotype control monoclonal antibodies and single conjugate  
733 controls were used to perform gating.

### 734 **Histology**

735 Mice were euthanized 24 h after infection. Lungs were removed and fixed in 4% PFA for 24 h and  
736 changed to 70% ethanol until embedding into paraffin wax. 5  $\mu$ m sections were subjected to  
737 hematoxylin and eosin staining (H&E) staining.

### 738 **Electron microscopy of mice lungs**

739 Samples were prepared for transmission electron microscopy (TEM) and serial block face  
740 scanning electron microscopy (SBF-SEM) as follows. Mice were infected with  $1.5 \times 10^6$  CFU of  
741 D39:Ply-H or ST306 and culled after 24 h. Mice were perfused with 20 ml PBS/0.1% EDTA  
742 followed by 10 ml 2.5% glutaraldehyde (w/v) in 0.1 M cacodylate buffer (pH 7.4). Whole lungs  
743 were removed, placed in fresh glutaraldehyde and fixed in a Pelco Biowave®Pro (Ted Pella

744 Inc.Redding California, USA). Tissue was further dissected into 1 mm cubes and fixed again  
745 before staining with reduced osmium (2% (w/v) OsO<sub>4</sub>, 1.5% (w/v) potassium ferrocyanide in  
746 ddH<sub>2</sub>O), 1% (w/v) thiocarbohydrazide (RT), 2% OsO<sub>4</sub> (w/v in ddH<sub>2</sub>O), then 1% (w/v) aqueous  
747 uranyl acetate overnight at 4°C. Next day, the tissue was finally stained with Walton's lead  
748 aspartate (0.02 M lead nitrate, 0.03 M aspartic acid, pH 5.5) at RT. To prevent precipitation  
749 artefacts, the tissue was washed copiously with ddH<sub>2</sub>O between each staining step. Unless stated,  
750 fixation and staining steps were performed in a Pelco Biowave®Pro at 100w 20 Hg, for 3 min and  
751 1 min, respectively. Dehydration was performed in a graded series of ethanol and acetone before  
752 overnight fixation and embedding in hard premix resin (TAAB, Reading, UK).  
753 For TEM, 70-74 nm serial sections were cut using a UC6 ultra microtome (Leica Microsystems,  
754 Wetzlar, Germany) and collected on Formvar (TAAB, Reading, UK) coated Gilder 200 mesh  
755 copper grids (TAAB, Reading, UK). Images were acquired on a 120 kV Tecnai G2 Spirit  
756 BioTWIN (FEI, Hillsboro, Oregon, USA) using a MegaView III camera and analySIS software  
757 (Olympus, Germany).

### 758 **Statistical analysis**

759 GraphPad Prism version 5 was used for statistical analysis. Statistical tests undertaken for  
760 individual experiments are mentioned in the respective figure legends.  $p < 0.05$  was considered to  
761 be statistically significant. Data were tested for normality and to define the variance of each group  
762 tested. All multi-parameter analyses included corrections for multiple comparisons and data are  
763 presented as mean  $\pm$  standard deviation (SD) unless otherwise stated.

764 **ACKNOWLEDGMENTS**

765 We thank Dr. Hassan Belrhali and Dr. Babu A. Manjasetty (EMBL) for providing support on the  
766 beamline and EMBL-DBT for providing access to the BM14 beamline at the ESRF. We are  
767 thankful to Mr. Prem Prakash (IIT Bombay) for diffraction data collection. We acknowledge  
768 Sophisticated Analytical Instrumentation Facility (SAIF), IIT Bombay for the "Protein  
769 Crystallography Facility", "Transmission electron microscopy" and "Confocal microscopy  
770 facility". We thank Angela Platt-Higgins (Institute of Integrative Biology, University of Liverpool)  
771 for support in preparation of histology samples and acknowledge the valuable suggestions from  
772 Prof. Rodney K. Tweten (Department of Microbiology and Immunology, University of Oklahoma)  
773 regarding NBD experiment.

774 **REFERENCES**

775

- 776 1. S. Rao *et al.*, Pathogen-Mediated Inhibition of Anorexia Promotes Host Survival and  
777 Transmission. *Cell* **168**, 503-516 e512 (2017).
- 778 2. J. L. McCarville, J. S. Ayres, Disease tolerance: concept and mechanisms. *Current opinion*  
779 *in immunology* **50**, 88-93 (2018).
- 780 3. J. N. Weiser, D. M. Ferreira, J. C. Paton, Streptococcus pneumoniae: transmission,  
781 colonization and invasion. *Nature reviews. Microbiology* **16**, 355-367 (2018).
- 782 4. A. Sandgren *et al.*, Effect of clonal and serotype-specific properties on the invasive  
783 capacity of Streptococcus pneumoniae. *The Journal of infectious diseases* **189**, 785-796  
784 (2004).
- 785 5. K. A. Geno *et al.*, Pneumococcal Capsules and Their Types: Past, Present, and Future.  
786 *Clinical microbiology reviews* **28**, 871-899 (2015).
- 787 6. K. Subramanian *et al.*, Pneumolysin binds to the mannose receptor C type 1 (MRC-1)  
788 leading to anti-inflammatory responses and enhanced pneumococcal survival. *Nature*  
789 *microbiology* **4**, 62-70 (2019).
- 790 7. R. Malley *et al.*, Recognition of pneumolysin by Toll-like receptor 4 confers resistance to  
791 pneumococcal infection. *Proceedings of the National Academy of Sciences of the United*  
792 *States of America* **100**, 1966-1971 (2003).
- 793 8. E. A. McNeela *et al.*, Pneumolysin activates the NLRP3 inflammasome and promotes  
794 proinflammatory cytokines independently of TLR4. *PLoS pathogens* **6**, e1001191 (2010).
- 795 9. K. Kuipers *et al.*, Age-related differences in IL-1 signaling and capsule serotype affect  
796 persistence of Streptococcus pneumoniae colonization. *PLoS pathogens* **14**, e1007396  
797 (2018).
- 798 10. M. A. Zafar, Y. Wang, S. Hamaguchi, J. N. Weiser, Host-to-Host Transmission of  
799 Streptococcus pneumoniae Is Driven by Its Inflammatory Toxin, Pneumolysin. *Cell host*  
800 *& microbe* **21**, 73-83 (2017).
- 801 11. J. M. Jefferies *et al.*, Presence of nonhemolytic pneumolysin in serotypes of Streptococcus  
802 pneumoniae associated with disease outbreaks. *The Journal of infectious diseases* **196**,  
803 936-944 (2007).
- 804 12. J. M. Jefferies *et al.*, Identification of novel pneumolysin alleles from paediatric carriage  
805 isolates of Streptococcus pneumoniae. *Journal of medical microbiology* **59**, 808-814  
806 (2010).
- 807 13. K. W. Yun, H. Lee, E. H. Choi, H. J. Lee, Diversity of Pneumolysin and Pneumococcal  
808 Histidine Triad Protein D of Streptococcus pneumoniae Isolated from Invasive Diseases in  
809 Korean Children. *PloS one* **10**, e0134055 (2015).
- 810 14. B. Henriques-Normark, C. Blomberg, J. Dagerhamn, P. Battig, S. Normark, The rise and  
811 fall of bacterial clones: Streptococcus pneumoniae. *Nature reviews. Microbiology* **6**, 827-  
812 837 (2008).
- 813 15. N. D. Ritchie, T. J. Mitchell, T. J. Evans, What is different about serotype 1 pneumococci?  
814 *Future microbiology* **7**, 33-46 (2012).
- 815 16. J. E. Marshall *et al.*, The Crystal Structure of Pneumolysin at 2.0 Å Resolution Reveals the  
816 Molecular Packing of the Pre-pore Complex. *Scientific reports* **5**, 13293 (2015).
- 817 17. S. L. Lawrence *et al.*, Crystal structure of Streptococcus pneumoniae pneumolysin provides  
818 key insights into early steps of pore formation. *Scientific reports* **5**, 14352 (2015).

- 819 18. K. van Pee *et al.*, CryoEM structures of membrane pore and prepore complex reveal  
820 cytolytic mechanism of Pneumolysin. *eLife* **6** (2017).
- 821 19. R. W. Bourdeau *et al.*, Cellular functions and X-ray structure of anthrolysin O, a  
822 cholesterol-dependent cytolysin secreted by *Bacillus anthracis*. *The Journal of biological*  
823 *chemistry* **284**, 14645-14656 (2009).
- 824 20. S. Johnson, N. J. Brooks, R. A. Smith, S. M. Lea, D. Bubeck, Structural basis for  
825 recognition of the pore-forming toxin intermedilysin by human complement receptor  
826 CD59. *Cell reports* **3**, 1369-1377 (2013).
- 827 21. J. Rossjohn, S. C. Feil, W. J. McKinstry, R. K. Tweten, M. W. Parker, Structure of a  
828 cholesterol-binding, thiol-activated cytolysin and a model of its membrane form. *Cell* **89**,  
829 685-692 (1997).
- 830 22. S. A. Park, Y. S. Park, S. M. Bong, K. S. Lee, Structure-based functional studies for the  
831 cellular recognition and cytolytic mechanism of pneumolysin from *Streptococcus*  
832 *pneumoniae*. *Journal of structural biology* **193**, 132-140 (2016).
- 833 23. R. Ramachandran, R. K. Tweten, A. E. Johnson, Membrane-dependent conformational  
834 changes initiate cholesterol-dependent cytolysin oligomerization and intersubunit beta-  
835 strand alignment. *Nature structural & molecular biology* **11**, 697-705 (2004).
- 836 24. S. D. Taylor *et al.*, The cholesterol-dependent cytolysin pneumolysin from *Streptococcus*  
837 *pneumoniae* binds to lipid raft microdomains in human corneal epithelial cells. *PloS one*  
838 **8**, e61300 (2013).
- 839 25. T. L. Thurston, M. P. Wandel, N. von Muhlinen, A. Foeglein, F. Randow, Galectin 8 targets  
840 damaged vesicles for autophagy to defend cells against bacterial invasion. *Nature* **482**, 414-  
841 418 (2012).
- 842 26. M. O'Seaghda, M. R. Wessels, Streptolysin O and its co-toxin NAD-glycohydrolase  
843 protect group A *Streptococcus* from Xenophagic killing. *PLoS pathogens* **9**, e1003394  
844 (2013).
- 845 27. M. V. Surve *et al.*, Heterogeneity in pneumolysin expression governs the fate of  
846 *Streptococcus pneumoniae* during blood-brain barrier trafficking. *PLoS pathogens* **14**,  
847 e1007168 (2018).
- 848 28. Y. E. Korchev *et al.*, A conserved tryptophan in pneumolysin is a determinant of the  
849 characteristics of channels formed by pneumolysin in cells and planar lipid bilayers. *The*  
850 *Biochemical journal* **329 ( Pt 3)**, 571-577 (1998).
- 851 29. R. G. El-Rachkidy, N. W. Davies, P. W. Andrew, Pneumolysin generates multiple  
852 conductance pores in the membrane of nucleated cells. *Biochemical and biophysical*  
853 *research communications* **368**, 786-792 (2008).
- 854 30. K. Sjoström *et al.*, Clonal and capsular types decide whether pneumococci will act as a  
855 primary or opportunistic pathogen. *Clinical infectious diseases : an official publication of*  
856 *the Infectious Diseases Society of America* **42**, 451-459 (2006).
- 857 31. A. Sandgren *et al.*, Virulence in mice of pneumococcal clonal types with known invasive  
858 disease potential in humans. *The Journal of infectious diseases* **192**, 791-800 (2005).
- 859 32. D. Fatykhova *et al.*, Serotype 1 and 8 Pneumococci Evade Sensing by Inflammasomes in  
860 Human Lung Tissue. *PloS one* **10**, e0137108 (2015).
- 861 33. L. Haste *et al.*, Development and characterization of a long-term murine model of  
862 *Streptococcus pneumoniae* infection of the lower airways. *Infection and immunity* **82**,  
863 3289-3298 (2014).

- 864 34. L. A. Kirkham *et al.*, Identification of invasive serotype 1 pneumococcal isolates that  
865 express nonhemolytic pneumolysin. *Journal of clinical microbiology* **44**, 151-159 (2006).
- 866 35. P. Drucker *et al.*, Pneumolysin-damaged cells benefit from non-homogeneous toxin  
867 binding to cholesterol-rich membrane domains. *Biochimica et biophysica acta. Molecular*  
868 *and cell biology of lipids* **1863**, 795-805 (2018).
- 869 36. H. Wolfmeier *et al.*, Active release of pneumolysin prepores and pores by mammalian cells  
870 undergoing a *Streptococcus pneumoniae* attack. *Biochimica et biophysica acta* **1860**, 2498-  
871 2509 (2016).
- 872 37. G. Ercoli *et al.*, Intracellular replication of *Streptococcus pneumoniae* inside splenic  
873 macrophages serves as a reservoir for septicaemia. *Nature microbiology* **3**, 600-610 (2018).
- 874 38. T. Brissac, A. T. Shenoy, L. A. Patterson, C. J. Orihuela, Cell Invasion and Pyruvate  
875 Oxidase-Derived H<sub>2</sub>O<sub>2</sub> Are Critical for *Streptococcus pneumoniae*-Mediated  
876 Cardiomyocyte Killing. *Infection and immunity* **86** (2018).
- 877 39. A. M. M. van Deursen *et al.*, The Impact of the 13-Valent Pneumococcal Conjugate  
878 Vaccine on Pneumococcal Carriage in the Community Acquired Pneumonia Immunization  
879 Trial in Adults (CAPiTA) Study. *Clinical infectious diseases : an official publication of*  
880 *the Infectious Diseases Society of America* **67**, 42-49 (2018).
- 881 40. R. L. Walsh, A. Camilli, *Streptococcus pneumoniae* is desiccation tolerant and infectious  
882 upon rehydration. *mBio* **2**, e00092-00011 (2011).
- 883 41. S. A. Frank, Models of parasite virulence. *The Quarterly review of biology* **71**, 37-78  
884 (1996).
- 885 42. L. R. Marks, R. M. Reddinger, A. P. Hakansson, High levels of genetic recombination  
886 during nasopharyngeal carriage and biofilm formation in *Streptococcus pneumoniae*. *mBio*  
887 **3** (2012).
- 888 43. U. B. Skov Sorensen, K. Yao, Y. Yang, H. Tettelin, M. Kilian, Capsular Polysaccharide  
889 Expression in Commensal *Streptococcus* Species: Genetic and Antigenic Similarities to  
890 *Streptococcus pneumoniae*. *mBio* **7** (2016).
- 891 44. C. Chaguza, J. E. Cornick, D. B. Everett, Mechanisms and impact of genetic recombination  
892 in the evolution of *Streptococcus pneumoniae*. *Computational and structural*  
893 *biotechnology journal* **13**, 241-247 (2015).
- 894 45. G. Pozzi *et al.*, Competence for genetic transformation in encapsulated strains of  
895 *Streptococcus pneumoniae*: two allelic variants of the peptide pheromone. *Journal of*  
896 *bacteriology* **178**, 6087-6090 (1996).
- 897 46. R. M. Harvey *et al.*, The impact of pneumolysin on the macrophage response to  
898 *Streptococcus pneumoniae* is strain-dependent. *PloS one* **9**, e103625 (2014).
- 899 47. A. B. Brueggemann, B. G. Spratt, Geographic distribution and clonal diversity of  
900 *Streptococcus pneumoniae* serotype 1 isolates. *Journal of clinical microbiology* **41**, 4966-  
901 4970 (2003).
- 902 48. S. Hammerschmidt *et al.*, Illustration of pneumococcal polysaccharide capsule during  
903 adherence and invasion of epithelial cells. *Infection and immunity* **73**, 4653-4667 (2005).
- 904 49. F. E. Amaral *et al.*, Rational manipulation of mRNA folding free energy allows rheostat  
905 control of pneumolysin production by *Streptococcus pneumoniae*. *PloS one* **10**, e0119823  
906 (2015).
- 907 50. M. Kjos *et al.*, Bright fluorescent *Streptococcus pneumoniae* for live-cell imaging of host-  
908 pathogen interactions. *Journal of bacteriology* **197**, 807-818 (2015).



- 909 51. W. Kabsch, Automatic Processing of Rotation Diffraction Data from Crystals of Initially  
910 Unknown Symmetry and Cell Constants. *Journal of applied crystallography* **26**, 795-800  
911 (1993).
- 912 52. B. W. Matthews, Solvent content of protein crystals. *Journal of molecular biology* **33**, 491-  
913 497 (1968).
- 914 53. A. J. McCoy *et al.*, Phaser crystallographic software. *Journal of applied crystallography*  
915 **40**, 658-674 (2007).
- 916 54. G. N. Murshudov *et al.*, REFMAC5 for the refinement of macromolecular crystal  
917 structures. *Acta crystallographica. Section D, Biological crystallography* **67**, 355-367  
918 (2011).
- 919 55. P. D. Adams *et al.*, PHENIX: a comprehensive Python-based system for macromolecular  
920 structure solution. *Acta crystallographica. Section D, Biological crystallography* **66**, 213-  
921 221 (2010).
- 922 56. P. Emsley, K. Cowtan, Coot: model-building tools for molecular graphics. *Acta*  
923 *crystallographica. Section D, Biological crystallography* **60**, 2126-2132 (2004).
- 924 57. R. A. Laskowski, M. W. Macarthur, D. S. Moss, J. M. Thornton, Procheck - a Program to  
925 Check the Stereochemical Quality of Protein Structures. *Journal of applied*  
926 *crystallography* **26**, 283-291 (1993).
- 927 58. W. L. DeLano (2002) The PyMOL Molecular Graphics System.
- 928 59. T. Schwede, J. Kopp, N. Guex, M. C. Peitsch, SWISS-MODEL: An automated protein  
929 homology-modeling server. *Nucleic acids research* **31**, 3381-3385 (2003).
- 930 60. T. L. Steck, J. A. Kant, Preparation of impermeable ghosts and inside-out vesicles from  
931 human erythrocyte membranes. *Methods in enzymology* **31**, 172-180 (1974).
- 932 61. A. P. Costa, X. Xu, D. J. Burgess, Freeze-anneal-thaw cycling of unilamellar liposomes:  
933 effect on encapsulation efficiency. *Pharmaceutical research* **31**, 97-103 (2014).
- 934 62. E. M. Hotze *et al.*, Monomer-monomer interactions drive the prepore to pore conversion  
935 of a beta-barrel-forming cholesterol-dependent cytolysin. *The Journal of biological*  
936 *chemistry* **277**, 11597-11605 (2002).
- 937 63. D. B. Morton, Pain and laboratory animals. *Nature* **317**, 106 (1985).
- 938
- 939

940 **FIGURE CAPTIONS & LEGENDS**

941 **Fig 1. Ply-NH can bind and oligomerize on membranes but is incapable of forming pores.**

942 (A) Hemolysis of sheep RBCs by pure Ply-H and Ply-NH at different concentrations. (B) Kinetics  
943 of calcein (hydrodynamic radii ~ 0.74 nm) release from liposomes upon addition of increasing  
944 concentrations of Ply-H and Ply-NH indicating the inability of Ply-NH to form pores on  
945 membranes. (C) Inhibition of hemolytic activity of Ply-H and Ply-NH (0.1  $\mu$ M) by different  
946 concentrations of cholesterol. (D) Western blot analysis of Ply-H and Ply-NH (0.01  $\mu$ M) following  
947 incubation with RBC ghost in the presence of cholesterol (50  $\mu$ M) revealing cholesterol binding  
948 ability of both Ply-H and Ply-NH. (E) Transmission electron micrograph (TEM) showing  
949 assembly and oligomerization of Ply-H and Ply-NH on liposomes. Scale bar: 50 nm. (F)  
950 Visualization of Ply-H and Ply-NH oligomers on A549 cells using SDS-PAGE (5%) followed by  
951 immuno-blotting. Higher order oligomers and monomers were observed in samples of A549 cells  
952 ( $10^6$ ) treated with either Ply-H or Ply-NH (0.5  $\mu$ g). Purified Ply-H and Ply-NH without cells were  
953 observed as monomers only (53 kDa).

954 Data information: Experiments are performed thrice and data of representative experiments are  
955 presented as mean  $\pm$  SD of triplicate wells (A, C).

956 **Fig 2. Loss of an essential cation- $\pi$  interaction inhibits transmembrane  $\beta$ -hairpin (TMH)  
957 formation in Ply-NH.**

958 (A) Cartoon representation of Ply-NH crystal structure where individual domains are labelled as  
959 D1, D2, D3 and D4. The substitutions are represented as spheres along with ball and stick and  
960 colored according to elements (C-cyan, N-blue and O-red). The deletion is marked by black arrow.  
961 The TMH1 and TMH2 are also highlighted in blue and brown, respectively. (B) Electrostatic  
962 surface representation of Ply-NH. The blue and red indicate the electropositive and electronegative  
963 regions, respectively. (C) Multiple sequence alignment of CDCs highlighting the conservation of  
964 tyrosine (highlighted in yellow, Y150 in Ply-H) and phenyl alanine (highlighted in magenta, F318  
965 in perfringolysin). (D) Hemolytic activity of Ply-H and its mutated variants (E286A, V287A and  
966 K288A) at different concentrations for identification of the potential  $\beta$ 4 residue which pairs with  
967 Y150 from  $\beta$ 1 of neighbouring monomer. (E) Cartoon representation of extended TMHs of two

968 Ply-H/Ply-NH monomers (M1 and M2 colored cyan and green for Ply-H and brown and grey for  
969 Ply-NH, respectively) in the oligomerized state. Inset: Zoomed in view showing inter-molecular  
970 cation- $\pi$  interaction between K288 and Y150 in Ply-H and its disruption in Ply-NH with H150  
971 substitution. (F) Close up view of the hydrophobic pocket in domain-3 formed by F169, I172,  
972 L176, Y247, V288 and L290 residues, which are shown as both sphere and ball and stick style  
973 (wheat color). The I172 (ball and stick model in red color) is found to be stabilized in the  
974 hydrophobic pocket. (G) Concentration dependent hemolytic profile of Ply-NH and its mutants  
975 showing gain of hemolytic activity. Individual mutations H150Y and I172T in Ply-NH show some  
976 gain of hemolytic activity, notably the double mutant (H150Y+I172T) shows gain of most of the  
977 hemolytic activity.

978 Data information: Experiments are performed thrice and data of representative experiments are  
979 presented as mean  $\pm$  SD of triplicate wells (D, G).

### 980 **Fig 3. Ply-NH is unable to form transmembrane $\beta$ -hairpins (TMH1 and TMH2)**

981 Fluorescence intensities of all the labelled proteins with and without liposomes are depicted by  
982 green triangles and red circles, respectively. The fluorescence emission scans of Ply-H labelled  
983 variants (A) S167C, H184C (TMH1) and (B) D257C, E260C (TMH2) and Ply-NH labelled  
984 variants (D) S175C, H184C (TMH1) and (E) D257C, E260C (TMH2) are shown. (C,F) Schematic  
985 representing formation of TMH in Ply-H (C) and its inability in Ply-NH (F).

### 986 **Fig 4. Abrogation of pore forming ability confers improved internalization capability in SPN 987 strains harbouring Ply-NH.**

988 (A) Invasion efficiency of R6:Ply-H and R6:Ply-NH strains in A549 cells. (B) Invasion efficiency  
989 of R6:Ply-H and R6:Ply-NH strains in THP-1 cells. (C) Invasion efficiency of D39:Ply-H,  
990 D39:Ply-NH and ST306 in primary human pulmonary alveolar epithelial cells. (D) Comparison of  
991 invasion efficiency of R6:Ply-H and R6:Ply-NH following pre-treatment of A549 cells with  
992 purified recombinant Ply-NH and Ply-H (0.1  $\mu$ g/ml), respectively. (E) Inhibition of internalization  
993 of R6:Ply-NH following pre-treatment of A549 cells with methyl  $\beta$ -cyclodextrin (M $\beta$ -CD, 3 and  
994 5 mM). (F) Dot blot showing localization of Ply-H and Ply-NH in low density lipid raft fractions  
995 of A549 cell membrane. CtxB and transferrin (Tfn) was used as positive and negative control,

996 respectively. (G) Immunofluorescence image showing uptake of CtxB-FITC coated latex beads  
997 (1.1  $\mu\text{m}$ ) by A549 cells following pre-treatment with Ply-H and Ply-NH. Internalized beads are  
998 shown in red (arrow mark) while external beads are dual (yellow) colored. Scale bar: 5  $\mu\text{m}$ .

999 Data information: Experiments are performed thrice and data of representative experiments are  
1000 presented as mean  $\pm$  SD of triplicate wells. Statistical analysis was performed using Student's two-  
1001 tailed unpaired t-test (A-B; D-E) and one-way ANOVA with Tukey's multiple comparison test  
1002 (C). ns, non-significant; \* $p < 0.05$ ; \*\* $p < 0.01$ ; \*\*\* $p < 0.001$ .

1003 **Fig 5. Loss of pore forming ability facilitates prolonged intracellular persistence of SPN.**

1004 (A) Intracellular survival efficiency of SPN R6 strains expressing either Ply-H, Ply-NH or Ply-  
1005 DM (H150Y+T172I) in A549s were calculated as percentage survival at indicated time points  
1006 relative to 0 h. (B) Intracellular survival efficiency of SPN R6 strains expressing either Ply-H or  
1007 Ply-NH in THP-1 macrophages. (C) Confocal micrographs showing association of SPN (blue)  
1008 expressing Ply-H or Ply-NH with Gal8 or Ubq (red), LC3 (green) and LAMP1 (pink) in A549s at  
1009 10 h.p.i. DAPI (blue) has been used to stain A549 nucleus and SPN DNA. Arrows designate the  
1010 bacteria shown in insets. Scale bar: 5  $\mu\text{m}$ . (D) Percent co-localization of Gal8 with SPN strains  
1011 expressing either Ply-H or Ply-NH in A549s at indicated time points post-infection. (E) Percentage  
1012 co-localization of Ubq with SPN strains expressing either Ply-H or Ply-NH in A549s at indicated  
1013 time points post-infection. (F-G) Quantification of co-localization of LC3 with Gal8 (F) or Ubq  
1014 (G) positive R6:Ply-H in A549s at 10 h.p.i. (H) Quantification of co-localization of SPN strains  
1015 expressing either Ply-H or Ply-NH with LysoTracker™ in A549s at 18 h.p.i.

1016 Data information: Experiments are performed thrice and data of representative experiments are  
1017 presented as mean  $\pm$  SD of triplicate wells.  $n \geq 100$  SPN per coverslip (D-H). Statistical analysis  
1018 was performed using one-way ANOVA with Tukey's multiple comparison test (A) and Student's  
1019 two-tailed unpaired t-test (B, D-E, G). ns, non-significant; \* $p < 0.05$ ; \*\* $p < 0.01$ ; \*\*\* $p < 0.001$ .

1020 **Fig 6. Ply-NH attenuates virulence of SPN and enables host tolerance and an intracellular**  
1021 **lifestyle in the lower respiratory tract.**

1022 (A) Survival time (h) of CD1 mice infected intra-nasally with  $1.5 \times 10^6$  CFU of D39:Ply-H,  
1023 D39:Ply-NH or serotype 1 ST306.  $n=10$  mice per group.  $p$ -values are from Log-rank test vs  
1024 D39:Ply-H, with Bonferroni correction applied for multiple comparisons. (B) CFU in lungs  
1025 immediately following infection (0 h,  $n=5$  mice per group) and in surviving mice from (A) at 168  
1026 h.p.i. (C) Histopathology of H&E stained lung tissue samples of mice infected with D39:Ply-H,  
1027 D39:Ply-NH, or ST306 SPN strains at 24 h.p.i. Magnification: 20X. (D) Survival time (h) of  
1028 CBA/Ca mice infected intra-nasally with  $1 \times 10^6$  CFU of D39:Ply-H, D39:Ply-NH, ST306,  
1029 D39:Ply<sup>W433F</sup> (mutant strain expressing a non-hemolytic Ply) or D39 $\Delta$ ply (Ply deletion mutant).  
1030  $n=10$  mice per group.  $p$ -values are from Log-rank test vs D39:Ply-H, with Bonferroni correction  
1031 applied for multiple comparisons. (E) Lung CFU at 96 h.p.i in surviving mice from the experiment  
1032 performed in (D). Statistical analysis was performed using one-way ANOVA with Tukey's  
1033 multiple comparisons test. (F) (i) SBF-SEM and (ii) TEM images of mice lung sections following  
1034 infection with ST306 for 24 h showing its intracellular localization (marked with arrow). Scale  
1035 bar: 5  $\mu$ m for (i) and 1  $\mu$ m for (ii). (G) SPN CFU in bronchoalveolar lavage or post-lavage lung  
1036 homogenates (tissue) of CBA/Ca mice at 48 h.p.i. For lavage, trachea were exposed and a syringe  
1037 was used to perform  $5 \times 1$  ml PBS with 1 mM EDTA washes of the lung. Pooled lavage was serially  
1038 diluted onto blood agar to determine planktonic and weakly adhered pneumococcal CFU. Lavaged  
1039 lungs were removed, homogenized and plated onto blood agar to determine intracellular or  
1040 strongly-adherent pneumococcal CFU. The lines depict SPN CFU counts in bronchoalveolar  
1041 lavage and post lavage lung homogenates from the same animal.

1042 **Fig 7. Schematic of pore formation by Ply variants and its role in pneumococcal lifestyle.**

1043 Cartoon representation of major stages of pore formation by Ply-H and Ply-NH and their  
1044 contribution to cellular uptake and intracellular fate of SPN.

1045

1046 **S1 Fig. Evolutionary tree of the various CDCs.**

1047 The evolutionary history was inferred using the Maximum Parsimony method. The bootstrap  
1048 consensus tree inferred from 500 replicates is taken to represent the evolutionary history of the  
1049 taxa analyzed. Evolutionary analyses were conducted in MEGA7.

1050 Gene Bank Accession numbers: Ply-H:AAK75991.1, Ply-NH:ABO21379.1,  
1051 Mitilysin:ABK58695.1, Suilysin:CAC94851.1, Intermedilysin:BAA89790.1,  
1052 Vaginolyisin:ACD39461.1, Inerolyisin:WP\_009310637.1, Ivanolyisin:AQY45513.1,  
1053 Listeriolysin:CAA42639.1, Seeligeriolysin:CAA42996.1, Pyolyisin:AAC45754.1,  
1054 Botulinolyisin:BAV54146.1, Tetanolysin:SUY56616.1, Streptolyisin:NP\_268546.1,  
1055 Perfringolyisin:WP\_126964861.1, Alveolyisin:EEL68223.1, Sphaericolyisin:BAF62176.1,  
1056 Cereolyisin: AAX88798.1, Anthrolysin:RVU61618.1, Lectinolyisin: EHE47793.1

1057 **S2 Fig. Evolutionary tree of the various Ply alleles.**

1058 The evolutionary history was inferred using the Maximum Parsimony method. The bootstrap  
1059 consensus tree inferred from 500 replicates is taken to represent the evolutionary history of the  
1060 taxa analyzed. Evolutionary analyses were conducted in MEGA7.

1061 Gene Bank Accession numbers: Allele-1:GU968409.1, Allele-2:GU968411.1, Allele-  
1062 3:EF413957.1, Allele-4:EF413925.1, Allele-5:EF413960.1, Allele-6:EF413939.1, Allele-  
1063 7:EF413936.1, Allele-8:GU968401.1, Allele-9:GU968397.1, Allele-10:EF413956.1, Allele-  
1064 11:EF413933.1, Allele-12:EF413929.1, Allele-13:EF413924.1, Allele-15:GU968405.1, Allele-  
1065 16:GU968252.1, Allele-17: GU968340.1, Allele-18: GU968232.1, Allele-19: KP982898.1,  
1066 Allele-20 (13).

1067 **S3 Fig. Pairwise sequence alignment of Ply-NH and Ply-H.**

1068 The amino acid sequence of Ply variants have been aligned using Clustal W. Invariant residues are  
1069 highlighted in red boxes while deletion and substitutions are showed in cyan color with blue  
1070 triangles. The secondary structural elements are shown for the crystal structure of Ply-NH. The  
1071 figure was prepared in ESript.

1072 **S4 Fig. Electron density of map of mutations positions in Ply-NH.**

1073 Two key substitutions and one deletion region in Ply-NH.

1074 (A)  $2F_o-F_c$  map (blue color) for H150.

1075 (B)  $F_o-F_c$  omit map (green color) for H150.

1076 (C)  $2F_o-F_c$  map (blue color) for I172.

1077 (D)  $F_o-F_c$  omit map (green color) for I172.

1078 (E) The  $2F_o-F_c$  map (blue color) for the loop which has the deletion.

1079 **S5 Fig. Significance of cation-  $\pi$  interaction in pore formation by Ply-H and Mitilysin.**

1080 (A) Specific hemolytic activity of Ply-H mutants indicating the importance of K288 residue in the  
1081 pore formation through cation- $\pi$  interaction, expressed as percentage relative to Ply-H. Data is  
1082 presented as mean  $\pm$  SD of triplicate wells. (B) Structural superposition of pore-form of Ply-H and  
1083 mitilysin (from *Streptococcus mitis*) demonstrating conservation of cation- $\pi$  interaction. Mitilysin  
1084 pore-form model was generated using Ply (5LY6) as template. The Ply-H monomers are shown in  
1085 cyan and green color, while mitilysin monomers are in brown and yellow. The residue side chains  
1086 are represented in ball and stick and protein molecule as cartoon.

1087 **S6 Fig. Pneumolysin expression, hemolytic activity and growth rate of recombinant SPN**  
1088 **strains used for *in vitro* and *in vivo* experiments.**

1089 (A) Western blot using anti-Ply and anti-Enolase (house-keeping gene) antibody to demonstrate  
1090 similar expression levels of Ply across different SPN R6 strains. (B) Hemolysis assay of SPN R6  
1091 lysates expressed as percentage activity relative to positive control (0.05% triton X-100). (C)  
1092 ELISA-determined Ply production per  $10^7$  bacteria in D39:Ply-H, D39:Ply-NH and ST306. (D)  
1093 Growth curves of different SPN strains measured by capturing optical density at 600 nm at  
1094 different time points.

1095

1096 Data information: Data is presented as mean  $\pm$  SD of triplicate wells (B-C) or samples (D).  
1097 Statistical analysis was performed using one-way ANOVA with Tukey's multiple comparison test  
1098 (B-C). ns, non-significant, \*\*\* $p < 0.001$ .

1099 **S7 Fig. Cytotoxic effect associated with recombinant Ply proteins and SPN infection.**

1100 (A) A549 cell viability assay performed at 0 h and 24 h following infection with R6:Ply-H and  
1101 R6:Ply-NH. (B) A549 cell viability assay performed using different concentrations of Ply-H (0.05  
1102 to 1 µg/ml) and Ply-NH. (C) THP-1 cell viability assay performed at 9 h following infection with  
1103 indicated MOIs of R6:Ply-H and R6:Ply-NH.

1104  
1105 Data information: Uninfected cells and cells treated with 0.05% triton X-100 were taken as  
1106 negative and positive controls, respectively. Experiments are performed thrice and data of  
1107 representative experiments are presented as mean ± SD of triplicate wells. Statistical analysis was  
1108 performed using Student's two-tailed unpaired t-test (A, C) or one-way ANOVA with Tukey's  
1109 multiple comparison test (B). ns, non-significant; \* $p < 0.05$ ; \*\* $p < 0.01$ ; \*\*\* $p < 0.001$ .

1110 **S8 Fig. Effect of different endocytic pathway specific inhibitors on uptake of cargo or CtxB-**  
1111 **coated latex beads by A549 cells.**

1112 (A) Inhibition of cholera toxin B (CtxB), a lipid raft pathway specific cargo, uptake by A549 cells  
1113 following treatment with Mβ-CD (5 mM, 1 h). Transferrin, a clathrin dependent endocytosis  
1114 pathway specific cargo was used as negative control. Scale bar: 5 µm. (B) Internalization of CtxB  
1115 coated latex beads by A549 cells following pre-treatment with the clathrin endocytosis inhibitor  
1116 CPZ (15 µM, 1 h) and lipid raft endocytic pathway inhibitor Mβ-CD (5 mM, 1 h). Internalized  
1117 beads are shown in red (arrow mark) while external beads are dual (yellow) colored. Scale bar: 5  
1118 µm.

1119 **S9 Fig. Effect of Ply mediated pore formation on intracellular survival capability of SPN.**

1120 (A) Hemolysis assay of SPN R6 lysates expressed as percentage activity relative to positive control  
1121 (0.05% triton X-100). (B) Percentage co-localization of Gal8 with SPN R6 strains expressing  
1122 either Ply-H, Ply-NH,  $\Delta ply$  or Ply<sup>W433F</sup> in A549s at 18 h.p.i. (C) Percentage co-localization of Ubq  
1123 with SPN strains expressing either Ply-H, Ply-NH,  $\Delta ply$  and Ply<sup>W433F</sup> in A549s at 18 h.p.i. (D, E)  
1124 Intracellular survival efficiency of SPN strains expressing either Ply-H, Ply-NH,  $\Delta ply$  or Ply-H,  
1125 Ply-NH, Ply<sup>W433F</sup> in A549s were calculated as percent survival at indicated time points relative to  
1126 0 h.



1127 Data information: Experiments are performed thrice and data of representative experiments are  
1128 presented as mean  $\pm$  SD of triplicate wells. Statistical analysis was performed using one-way  
1129 ANOVA with Tukey's multiple comparison test (A-D). ns, non-significant; \* $p$ <0.05; \*\* $p$ <0.01;  
1130 \*\*\* $p$ <0.001.

1131 **S10 Fig. Attenuated inflammatory responses in mice infected with Ply-NH expressing**  
1132 **pneumococci (Acute infection model).**

1133 (A) Pain score, according to the scheme of Morton, in CD1 mice infected with  $1.5 \times 10^6$  CFU SPN  
1134 in 50  $\mu$ l PBS. Red crosses indicate where a mouse was culled due to ill health. n=10 mice per  
1135 group. (B) Lung CFU over the first 2 days of infection. ELISA-determined KC (C) and interleukin-  
1136 6 (D) concentrations in lung homogenates from infected mice. (E) Numbers of CD45+ leukocytes  
1137 and (F) CD45+, Gr-1+, F4/80 low neutrophils (PMN) in lung homogenates from infected mice as  
1138 determined by flow cytometry.  $p$ -values in (C-F) are from two-way ANOVA analysis with  
1139 Dunnett's multiple comparisons test; n=5 mice per group (B-F).

1140 **S11 Fig. ST306 pneumococci show a preference for intracellular lifestyle.**

1141 (A-F) Electron microscopy images of ST306-infected lungs. A single mouse was infected with  
1142  $1.5 \times 10^6$  CFU ST306 in 50  $\mu$ l PBS through intranasal route and culled at 24 h.p.i. Fixative-perfused  
1143 lungs were removed and embedded in resin before imaging on a serial block face scanning electron  
1144 microscope (SBF-SEM). Images in (A-F) are sequential planes 180 nm apart, covering a total  
1145 depth of 1080 nm. Scale bar: 5  $\mu$ m.

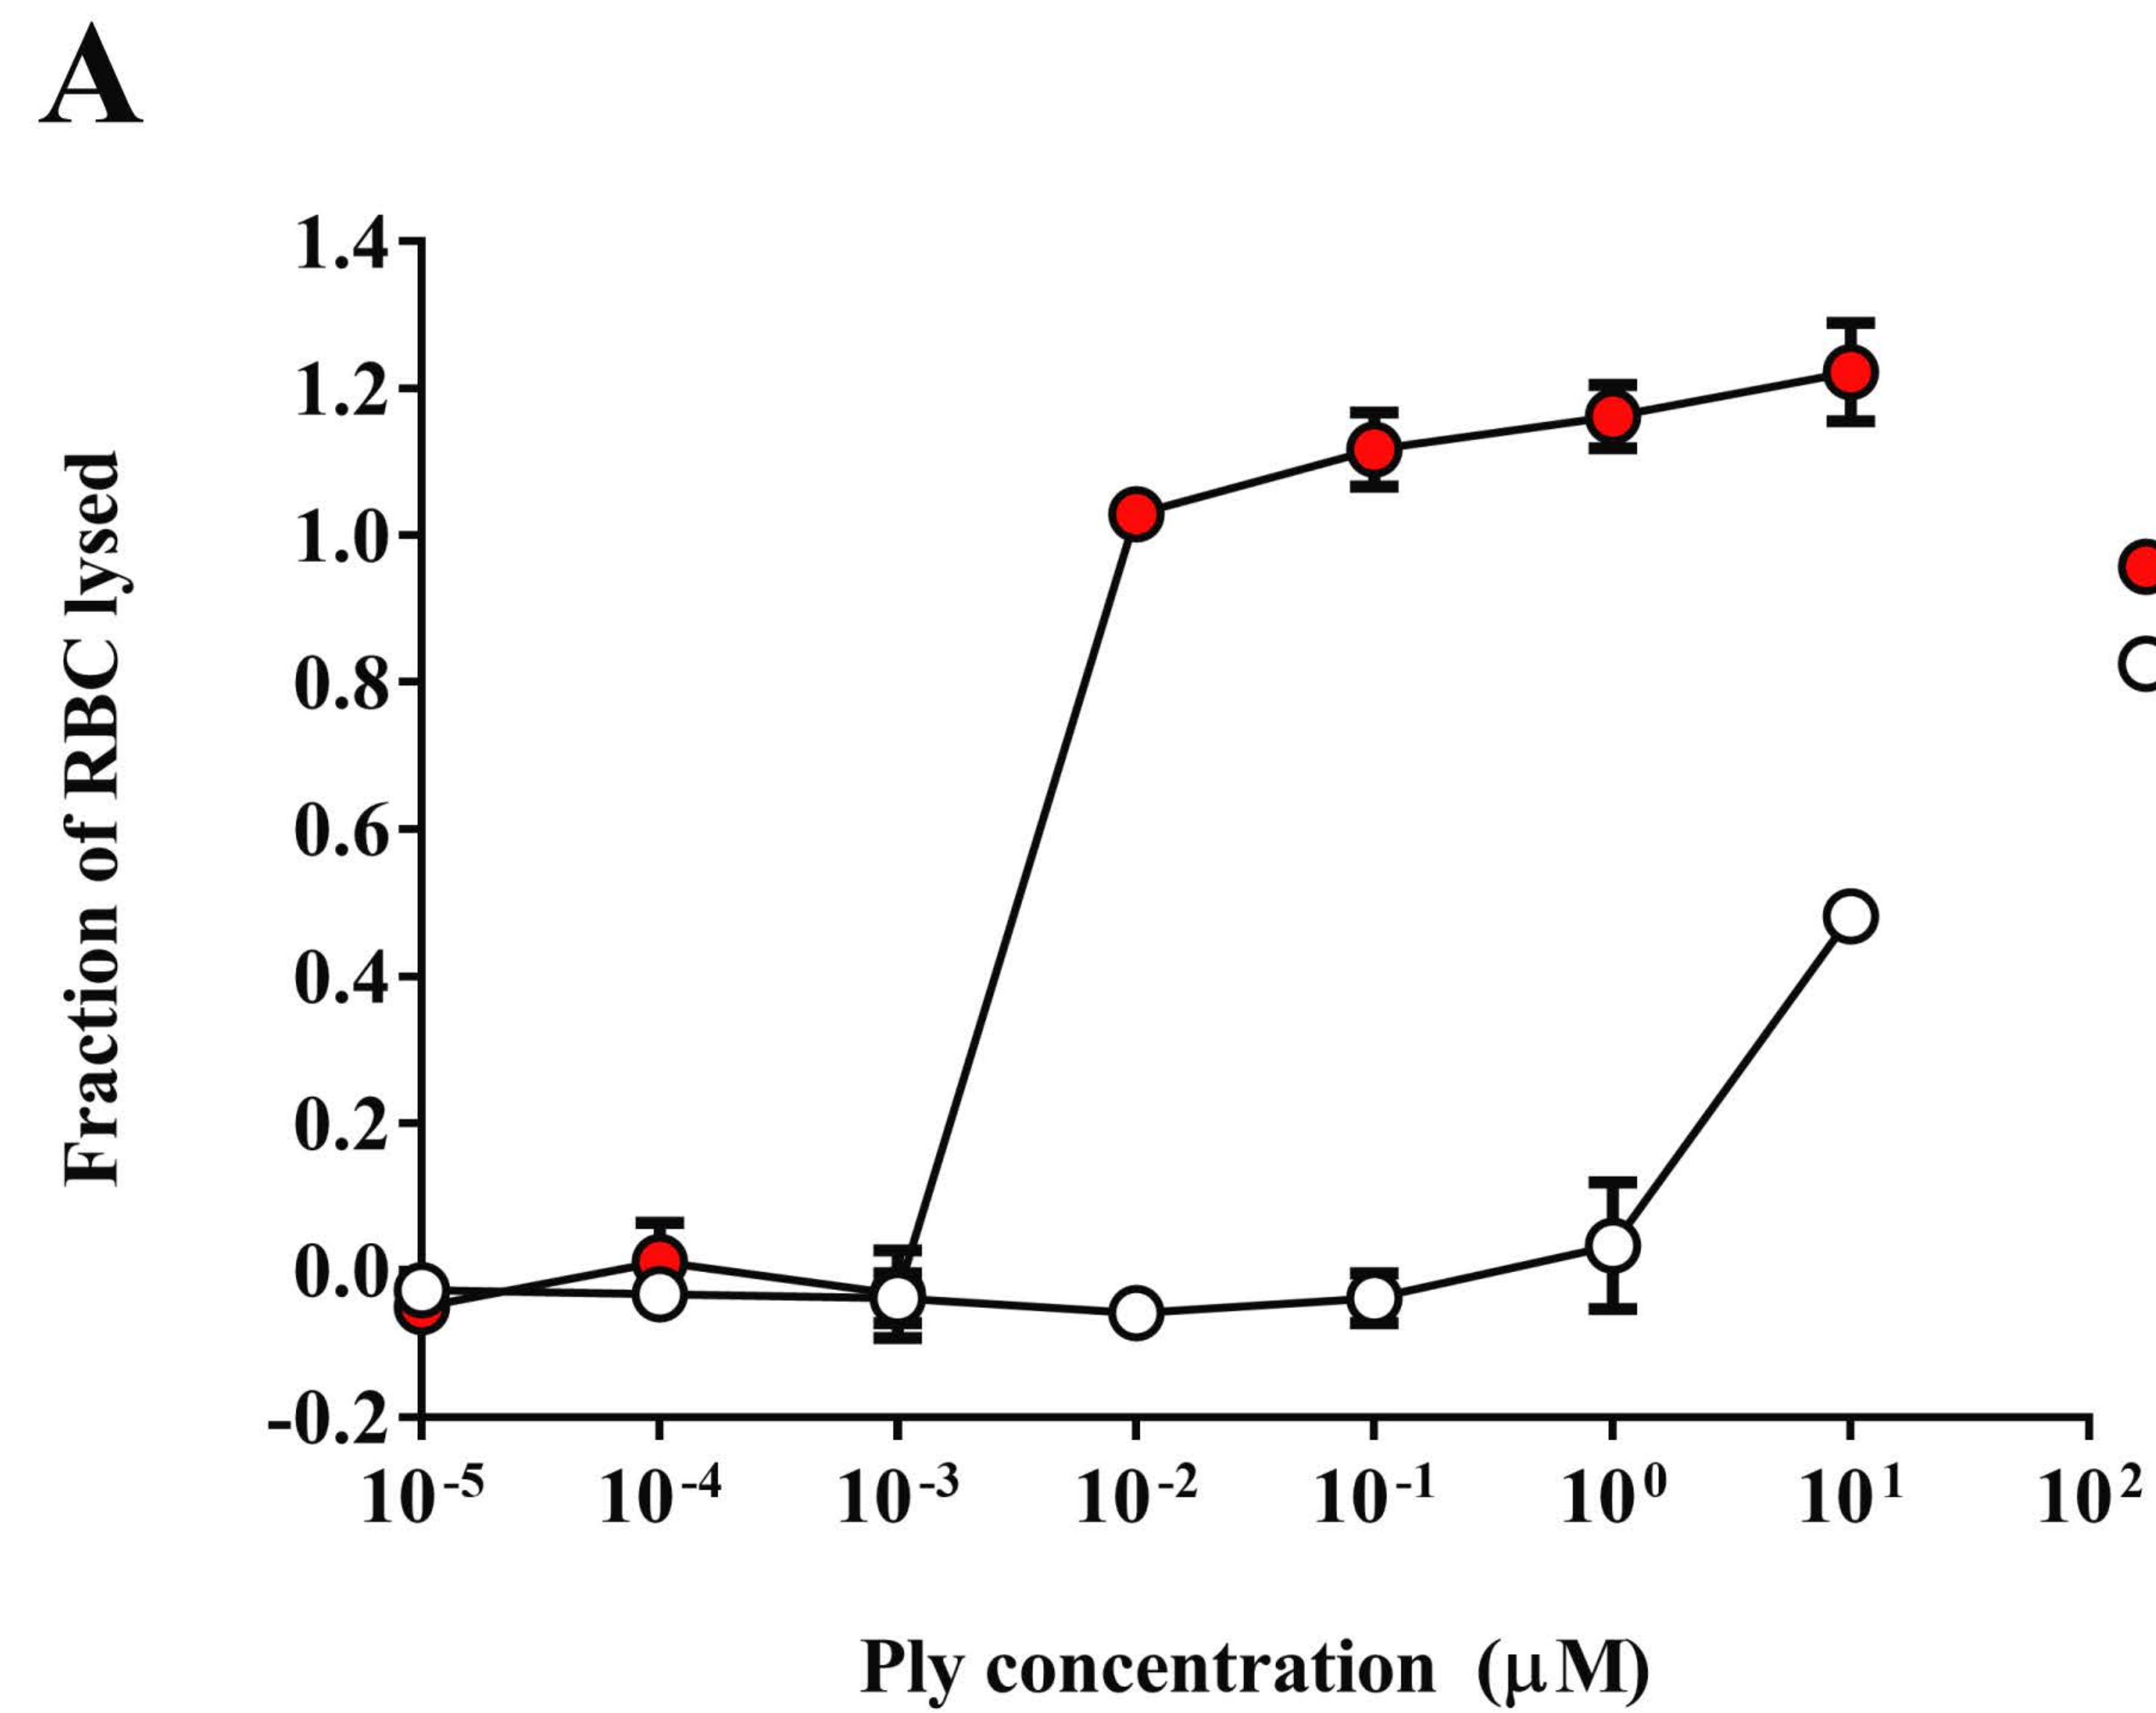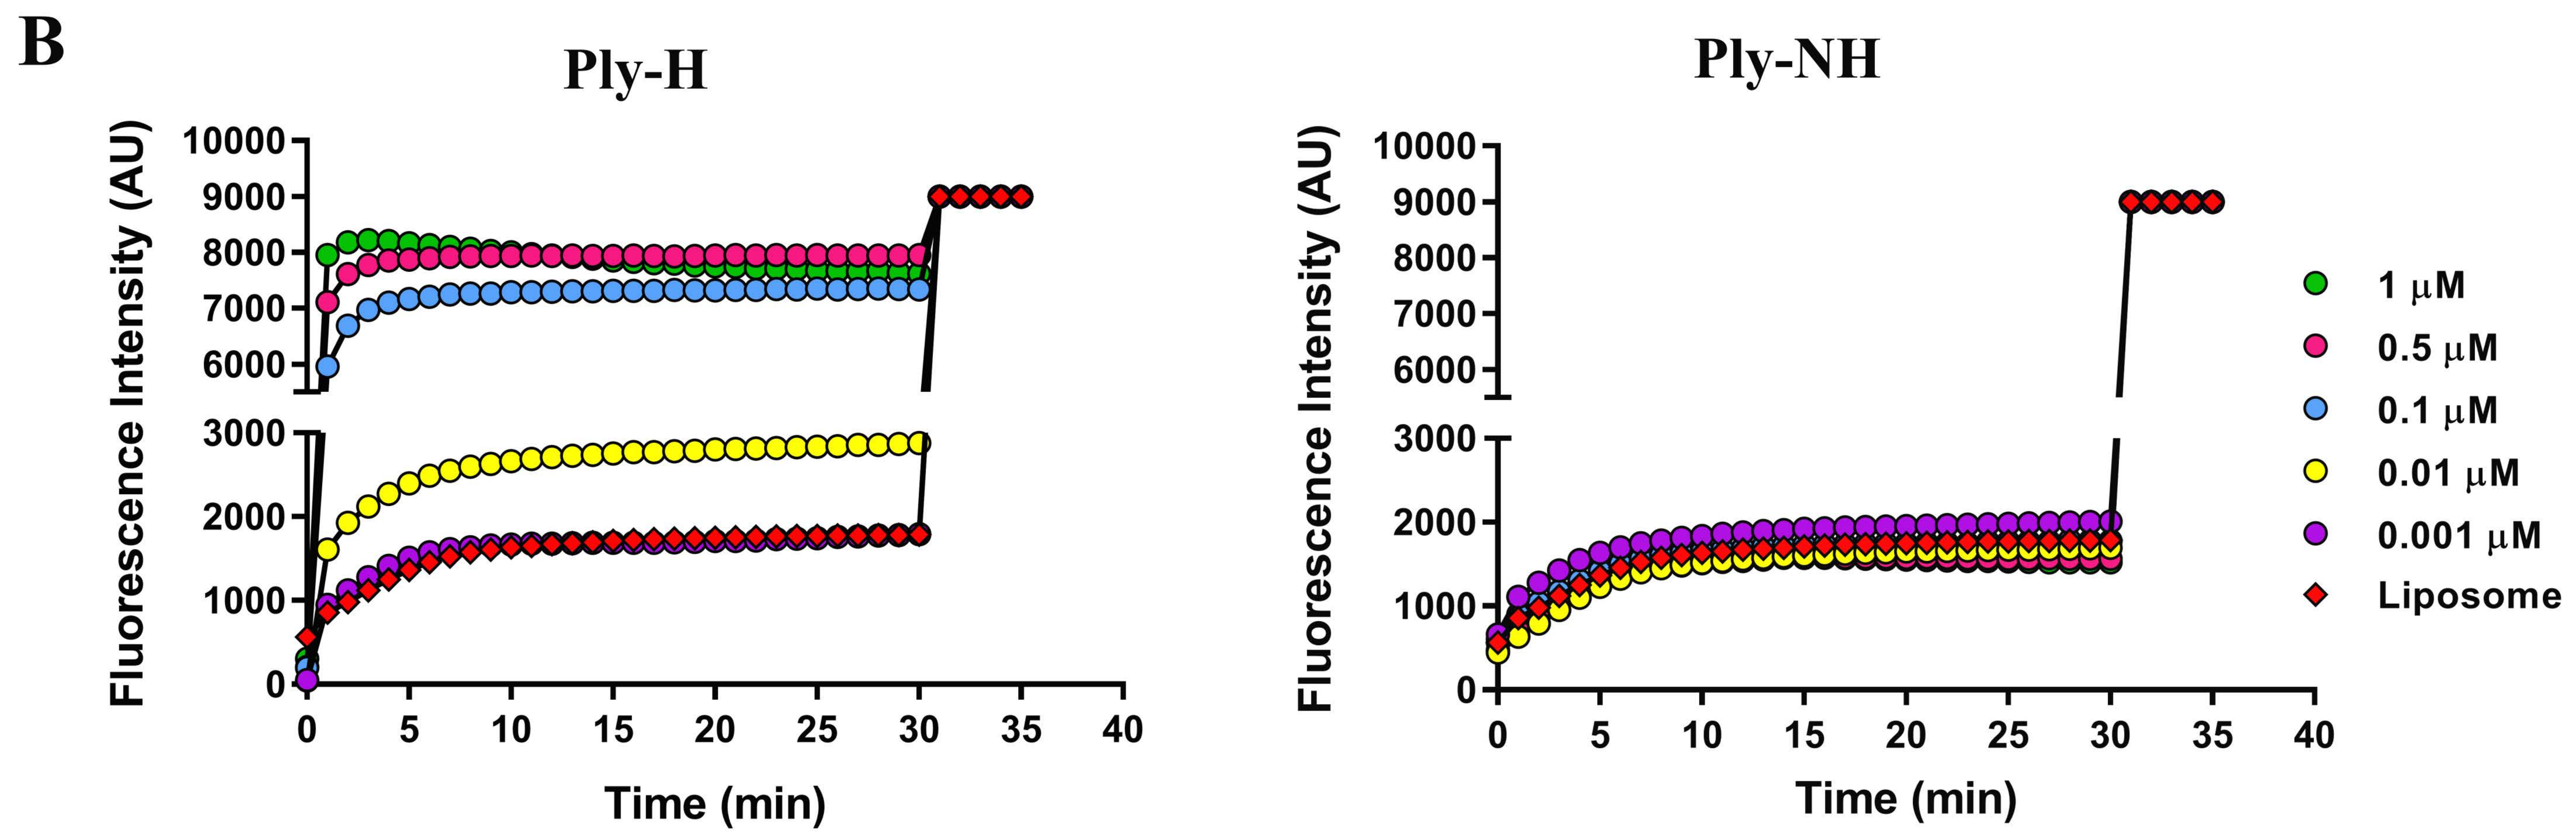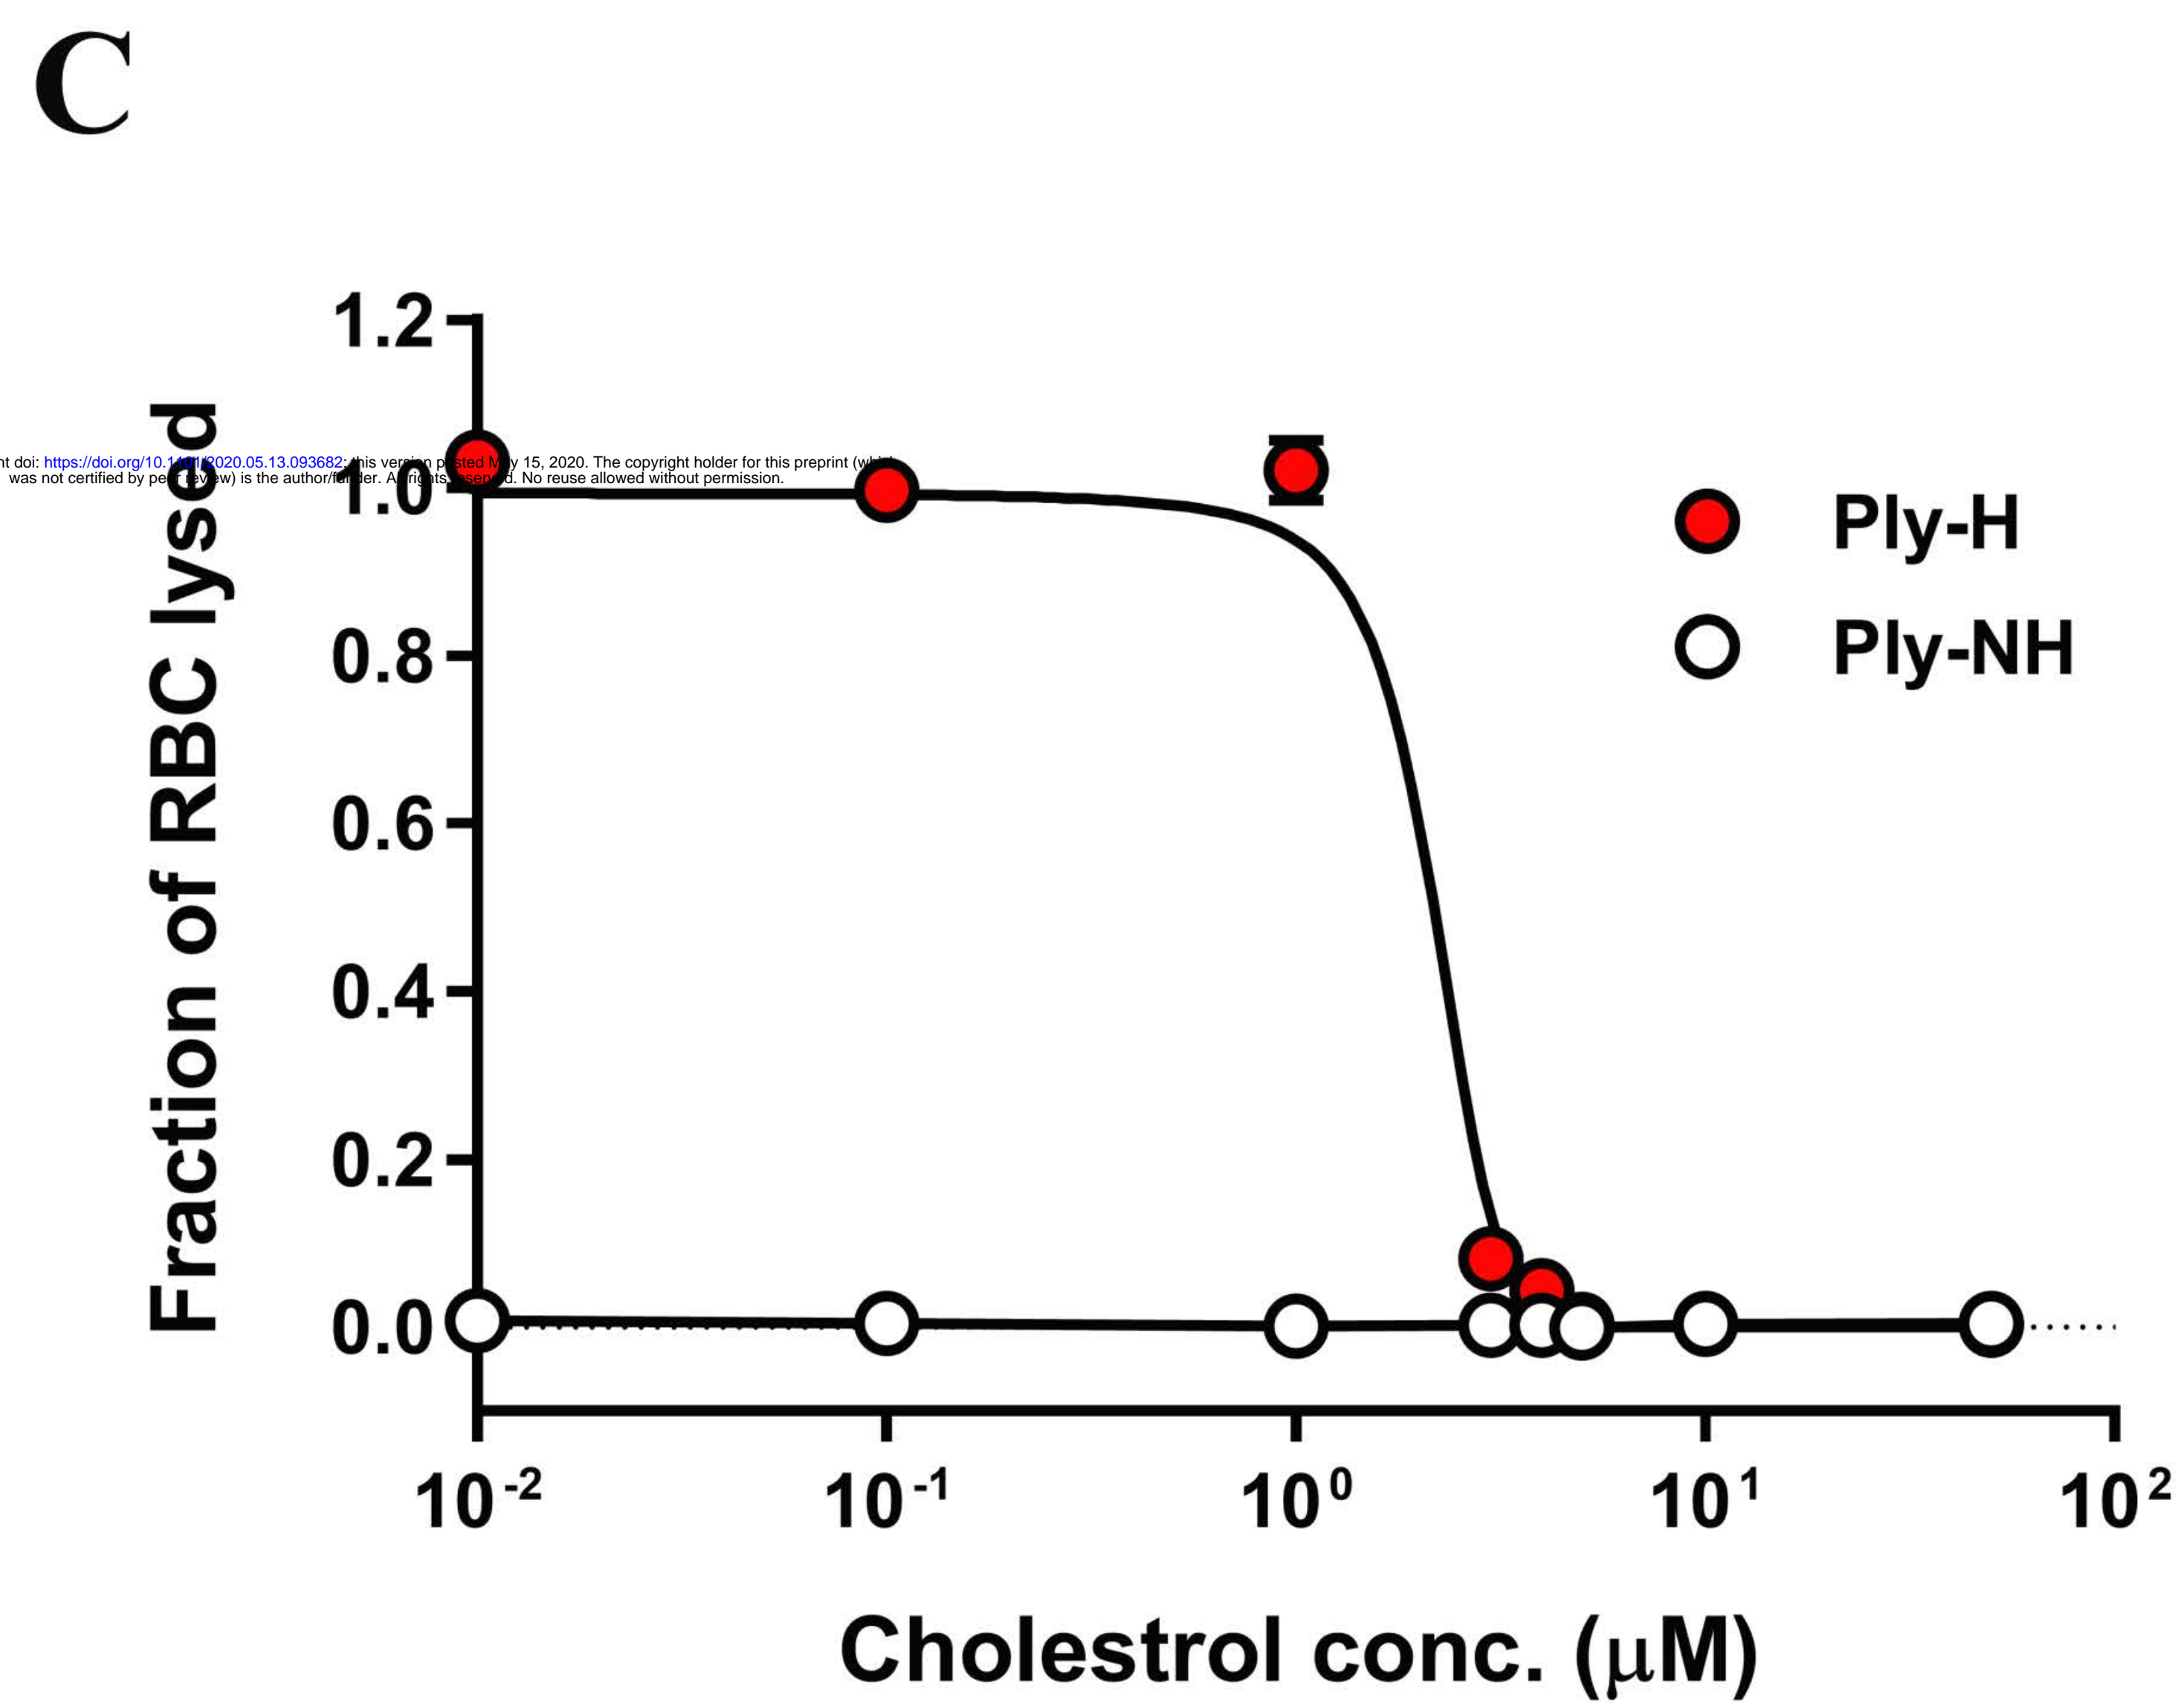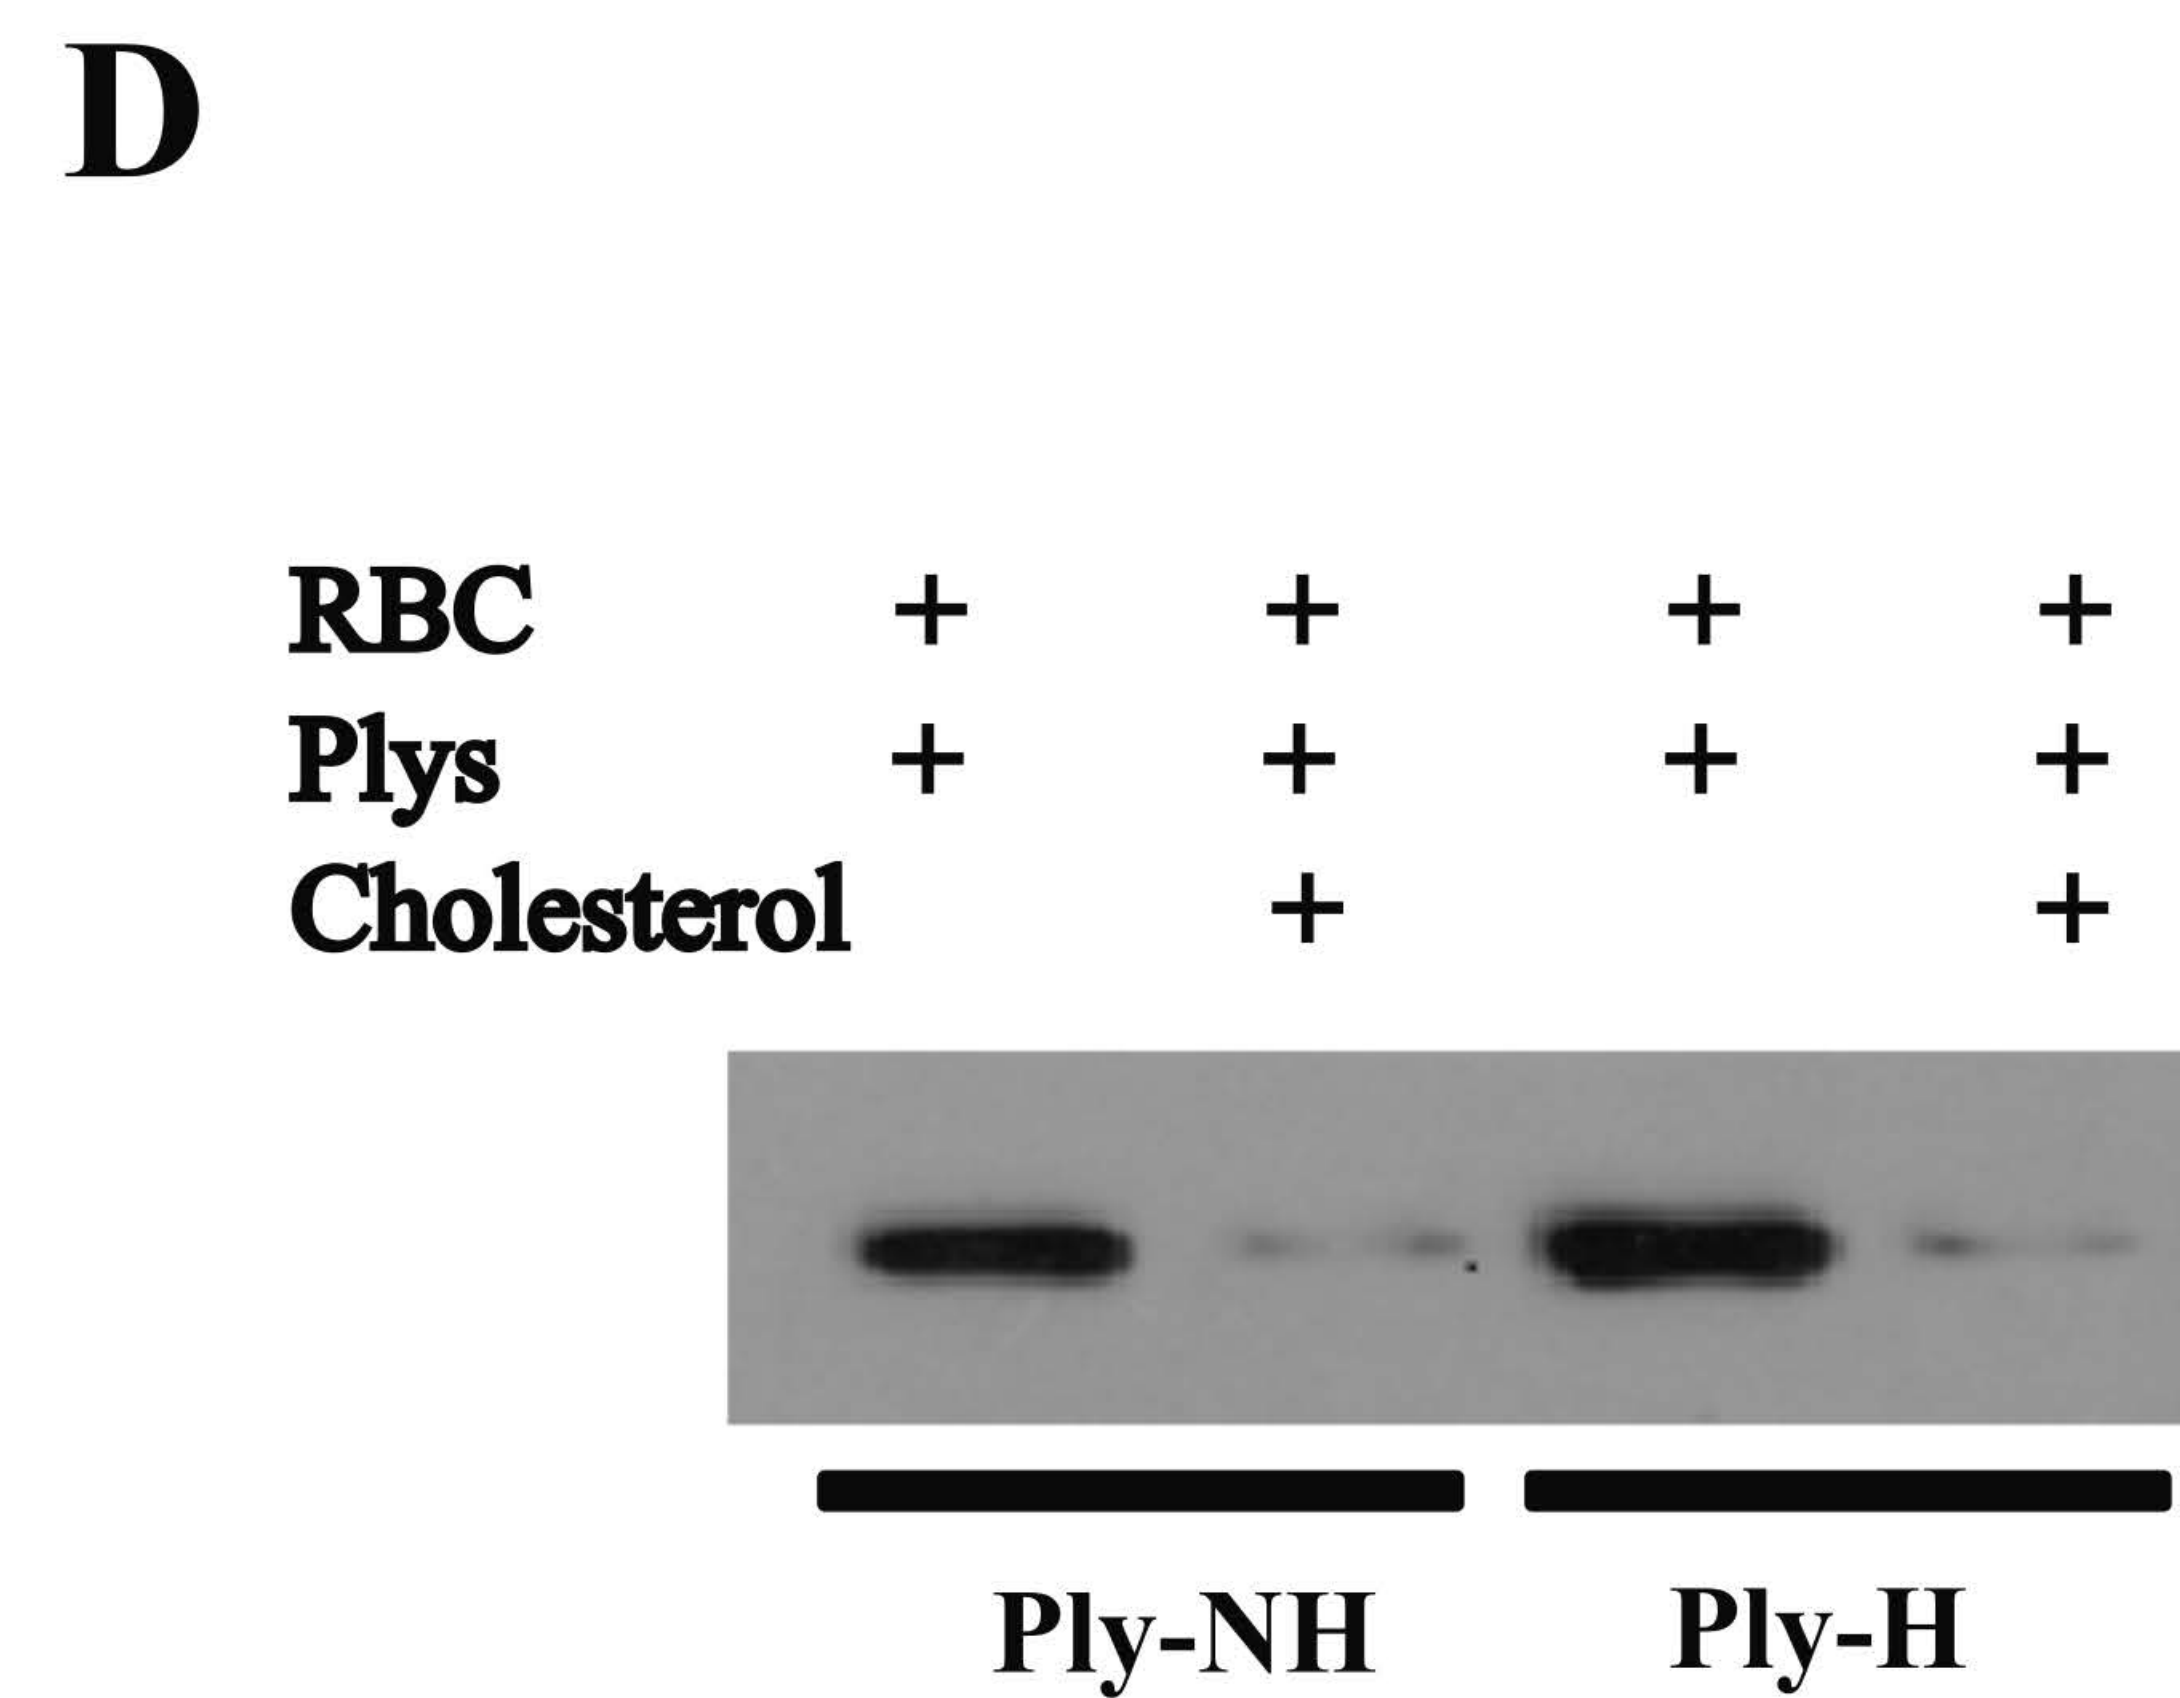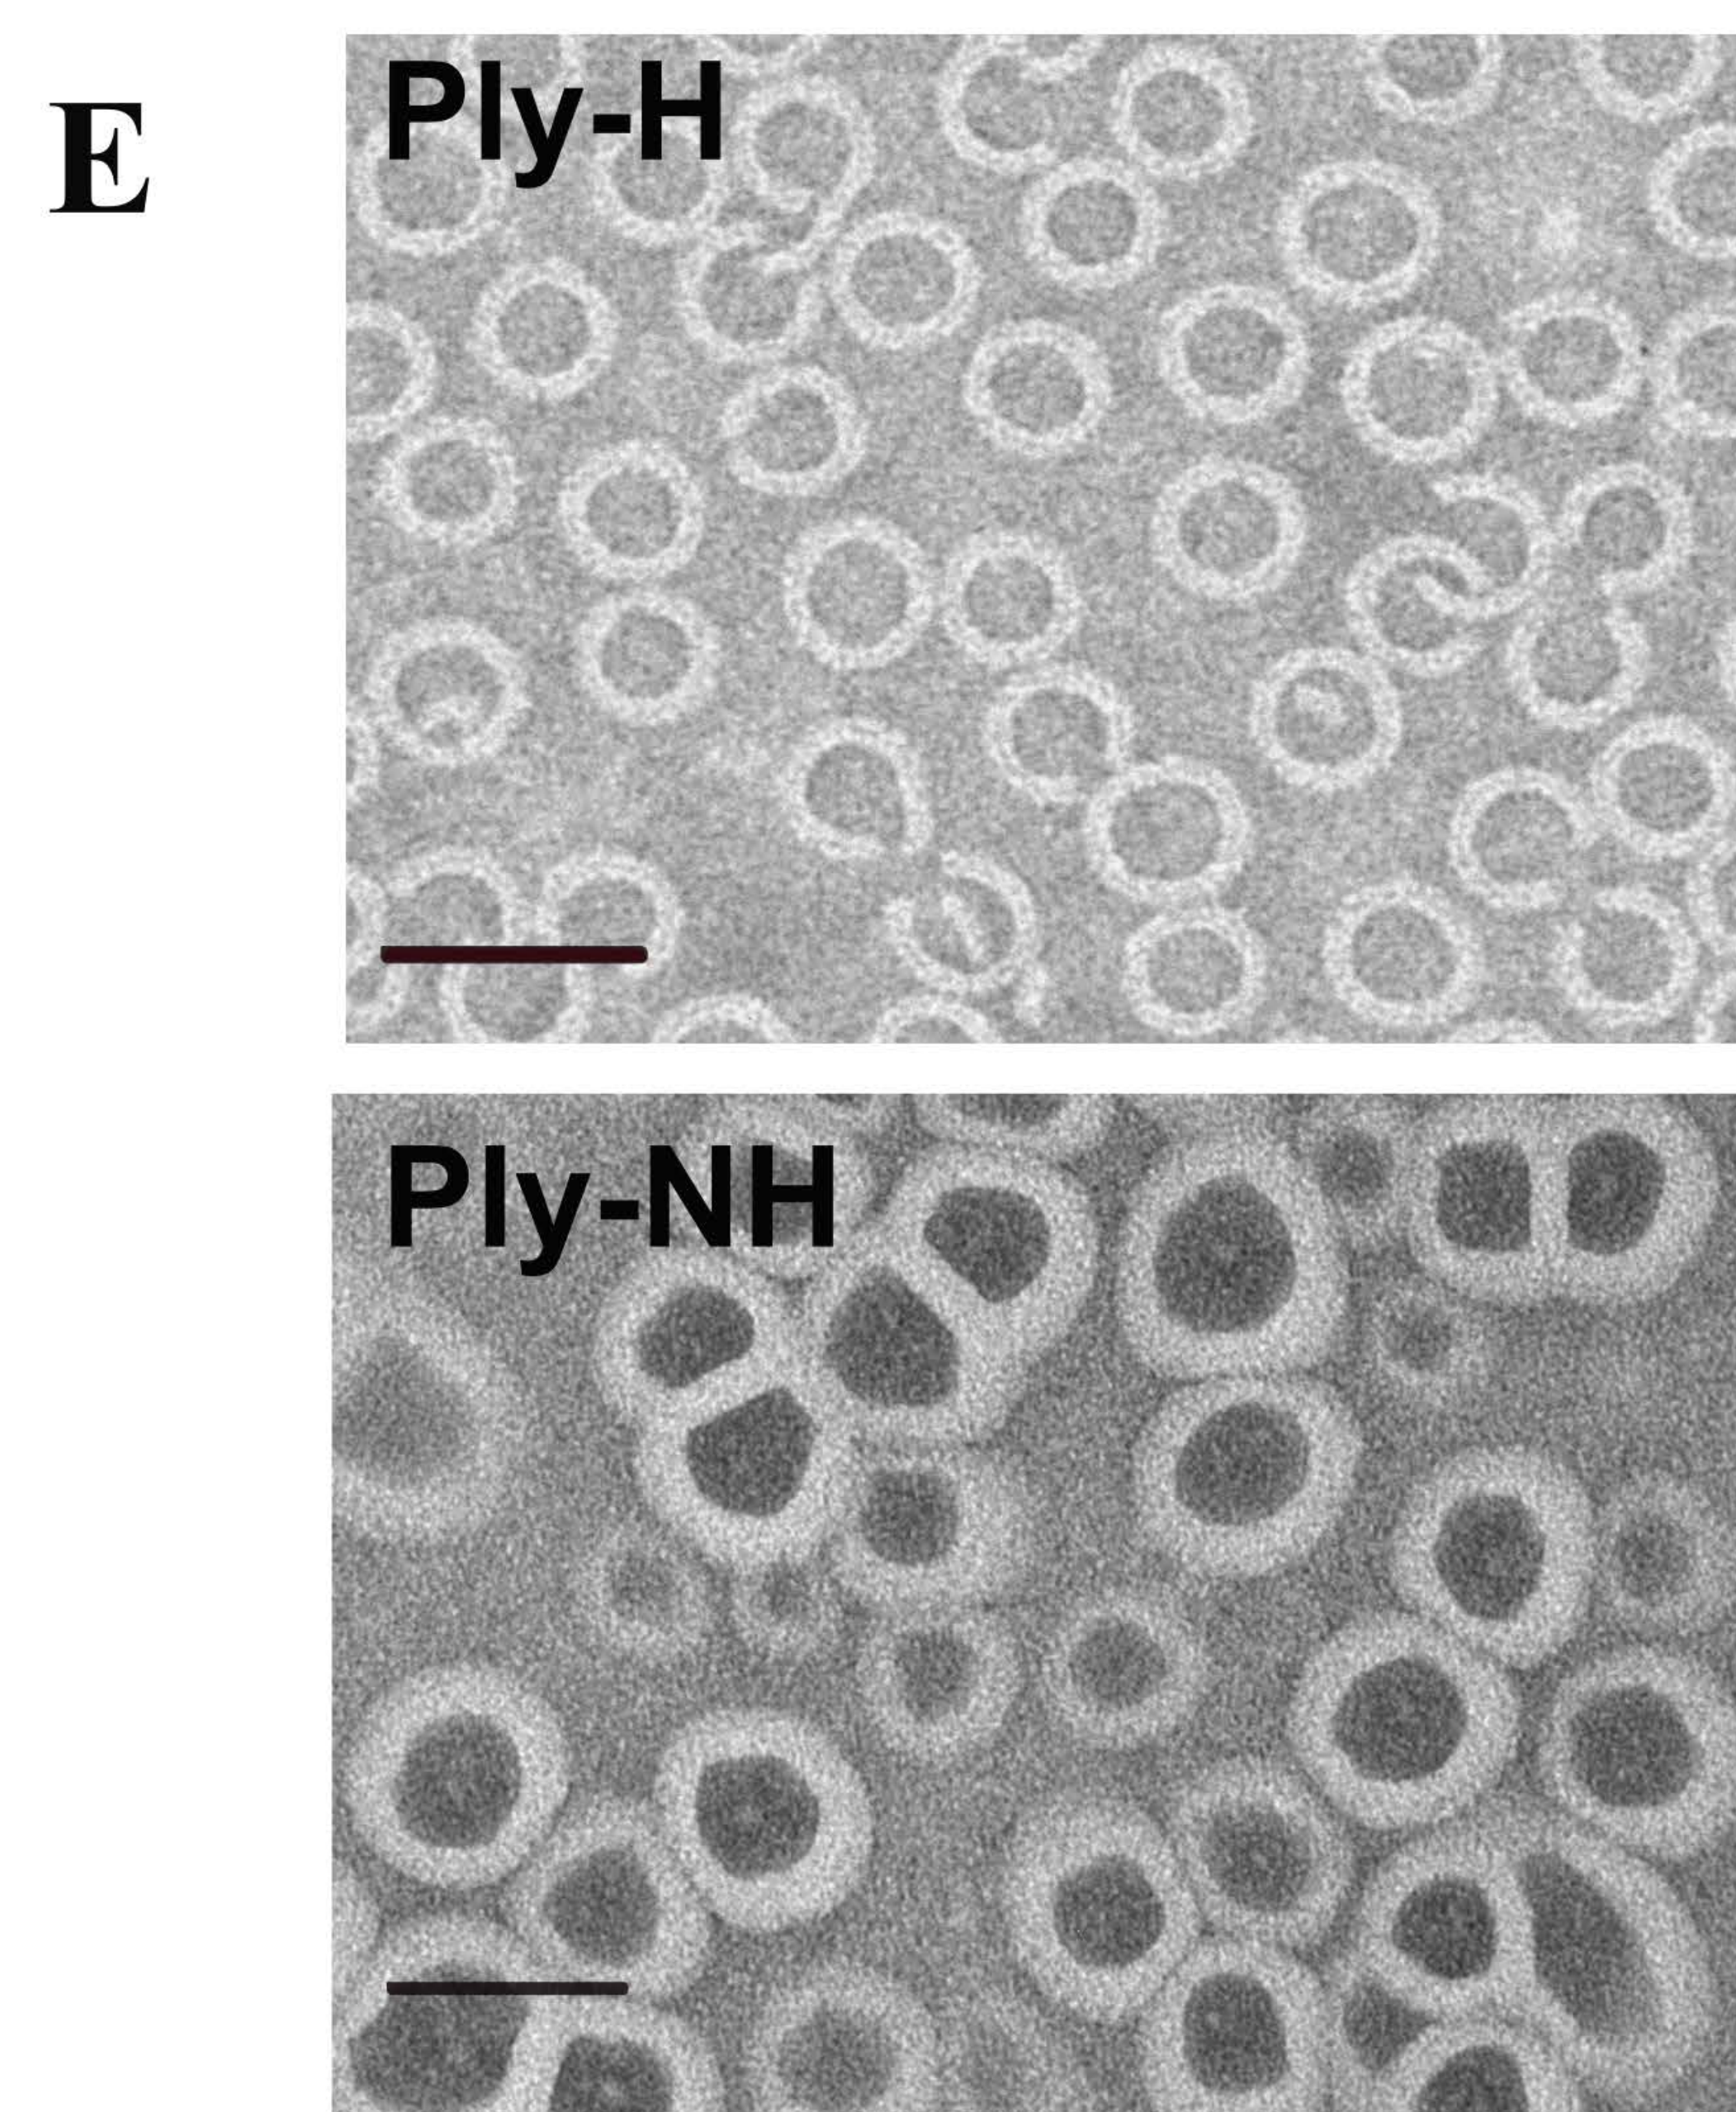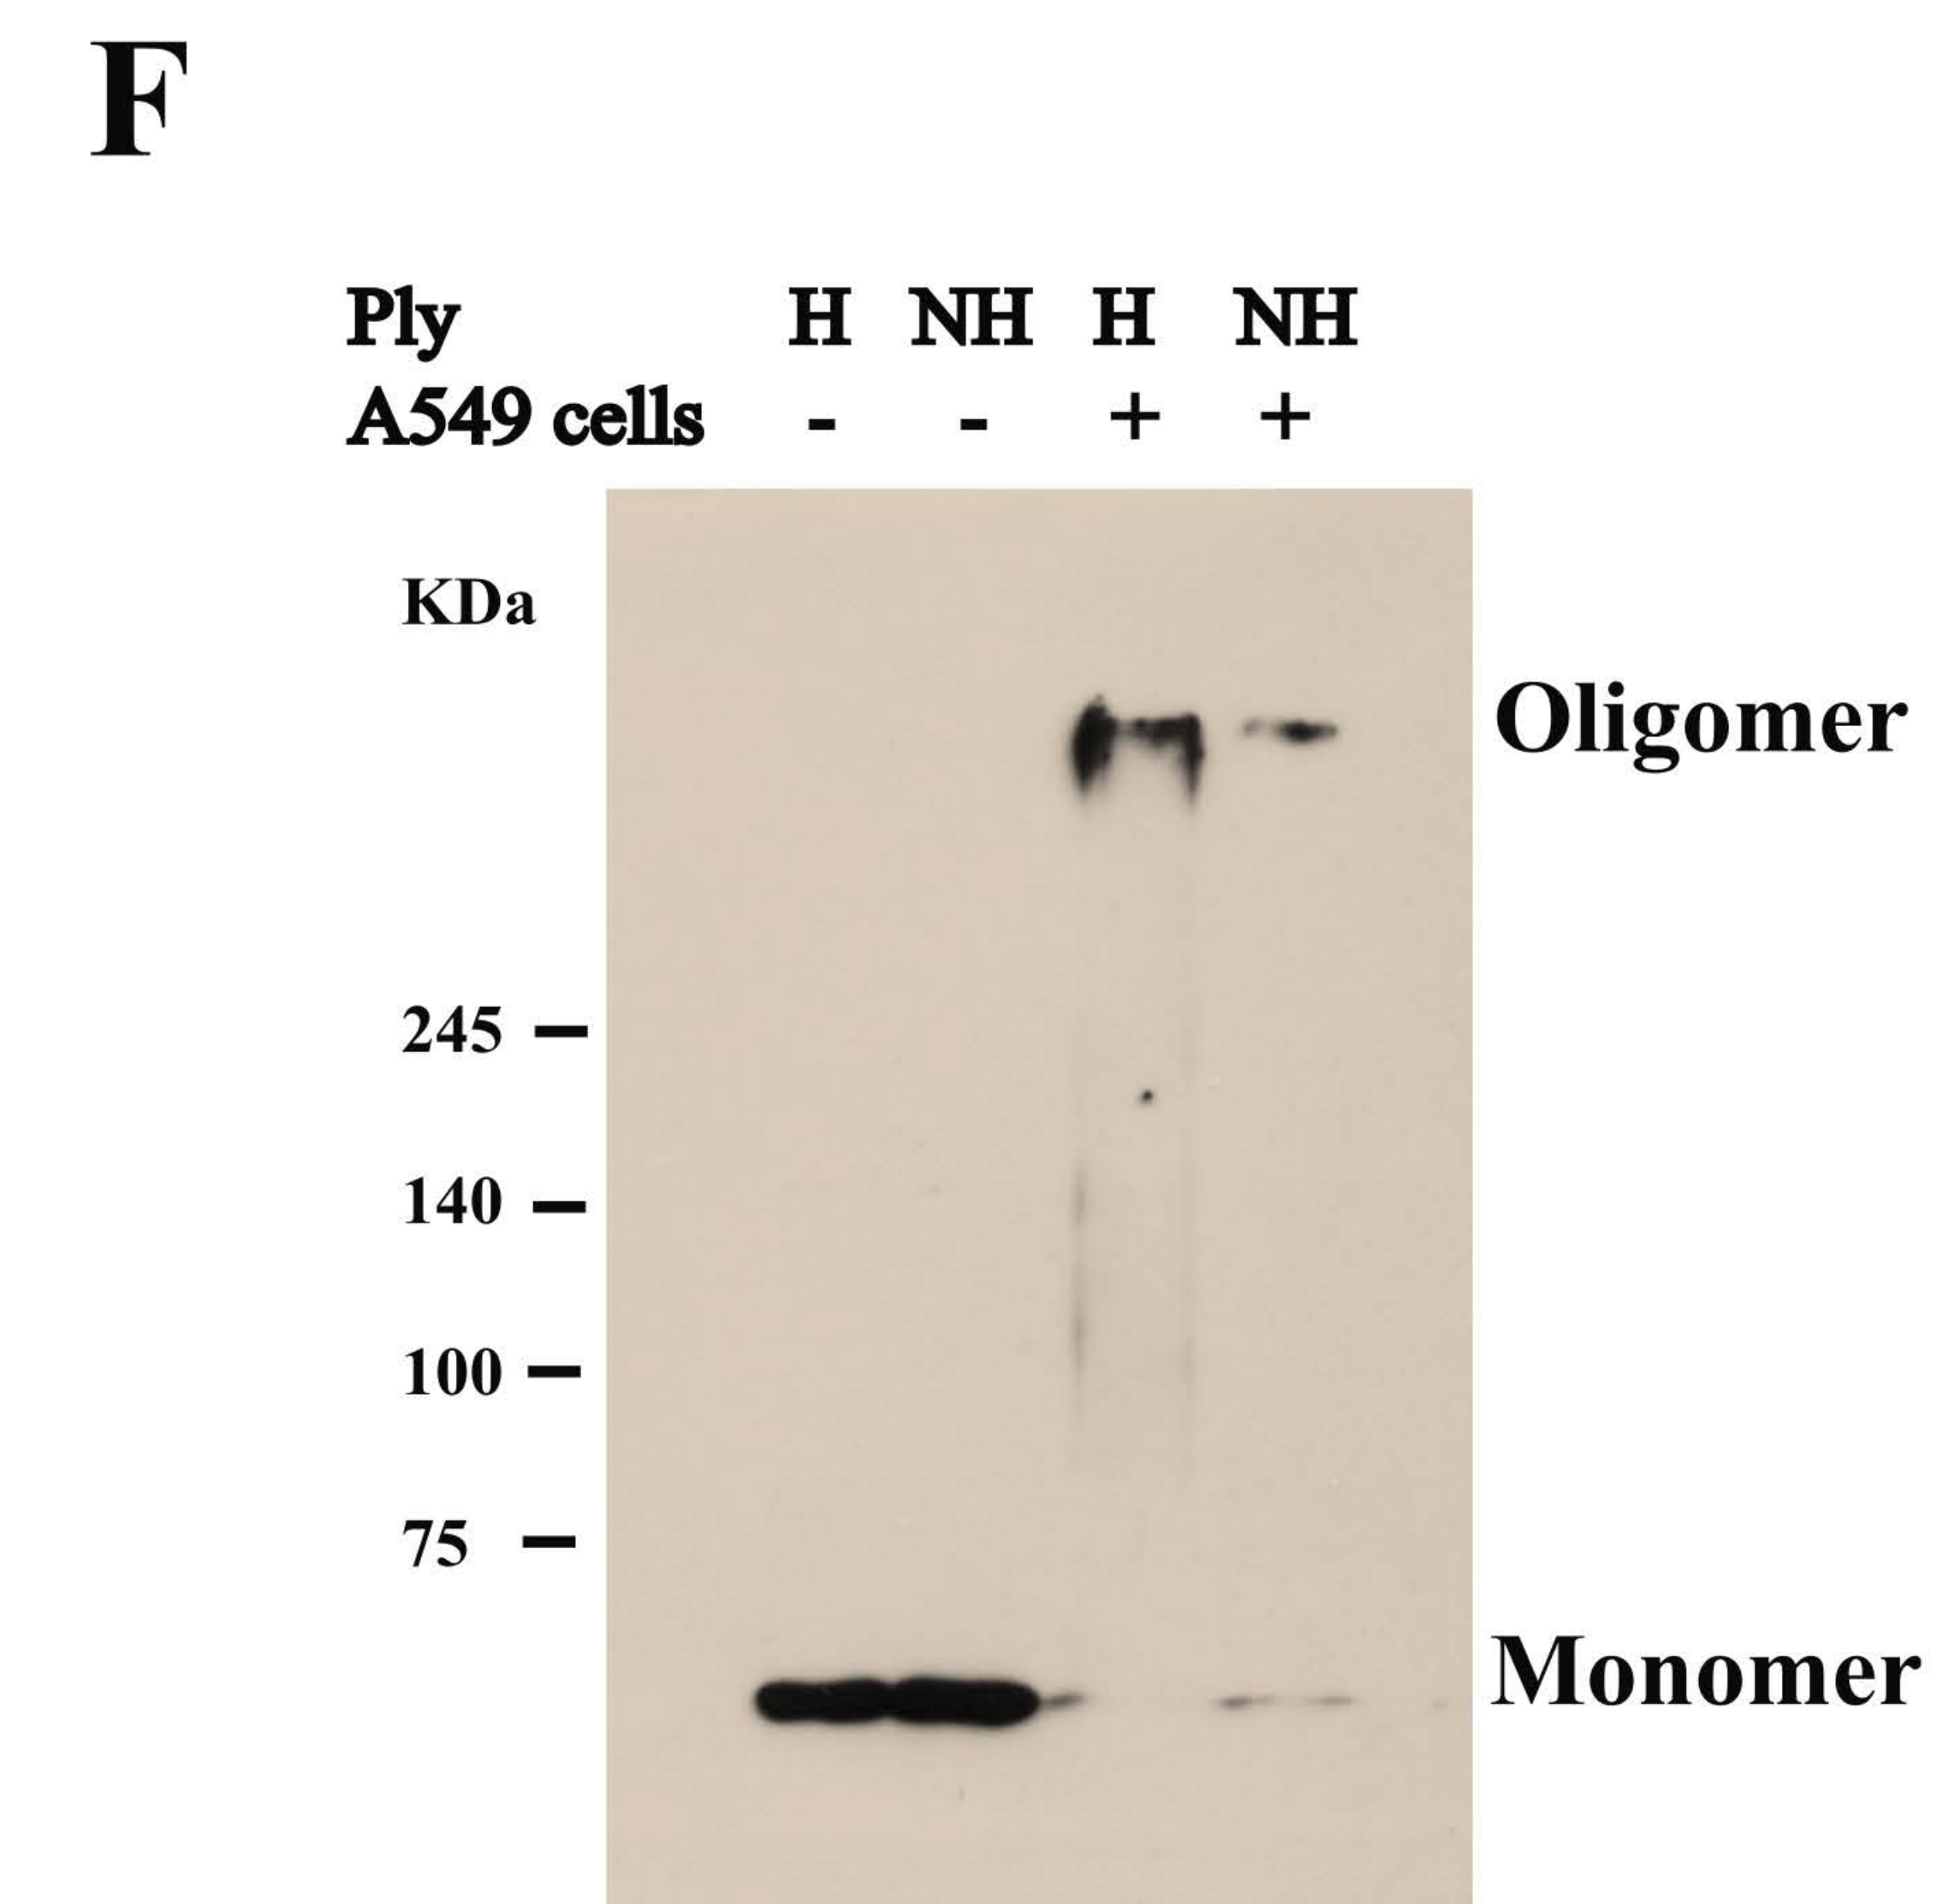

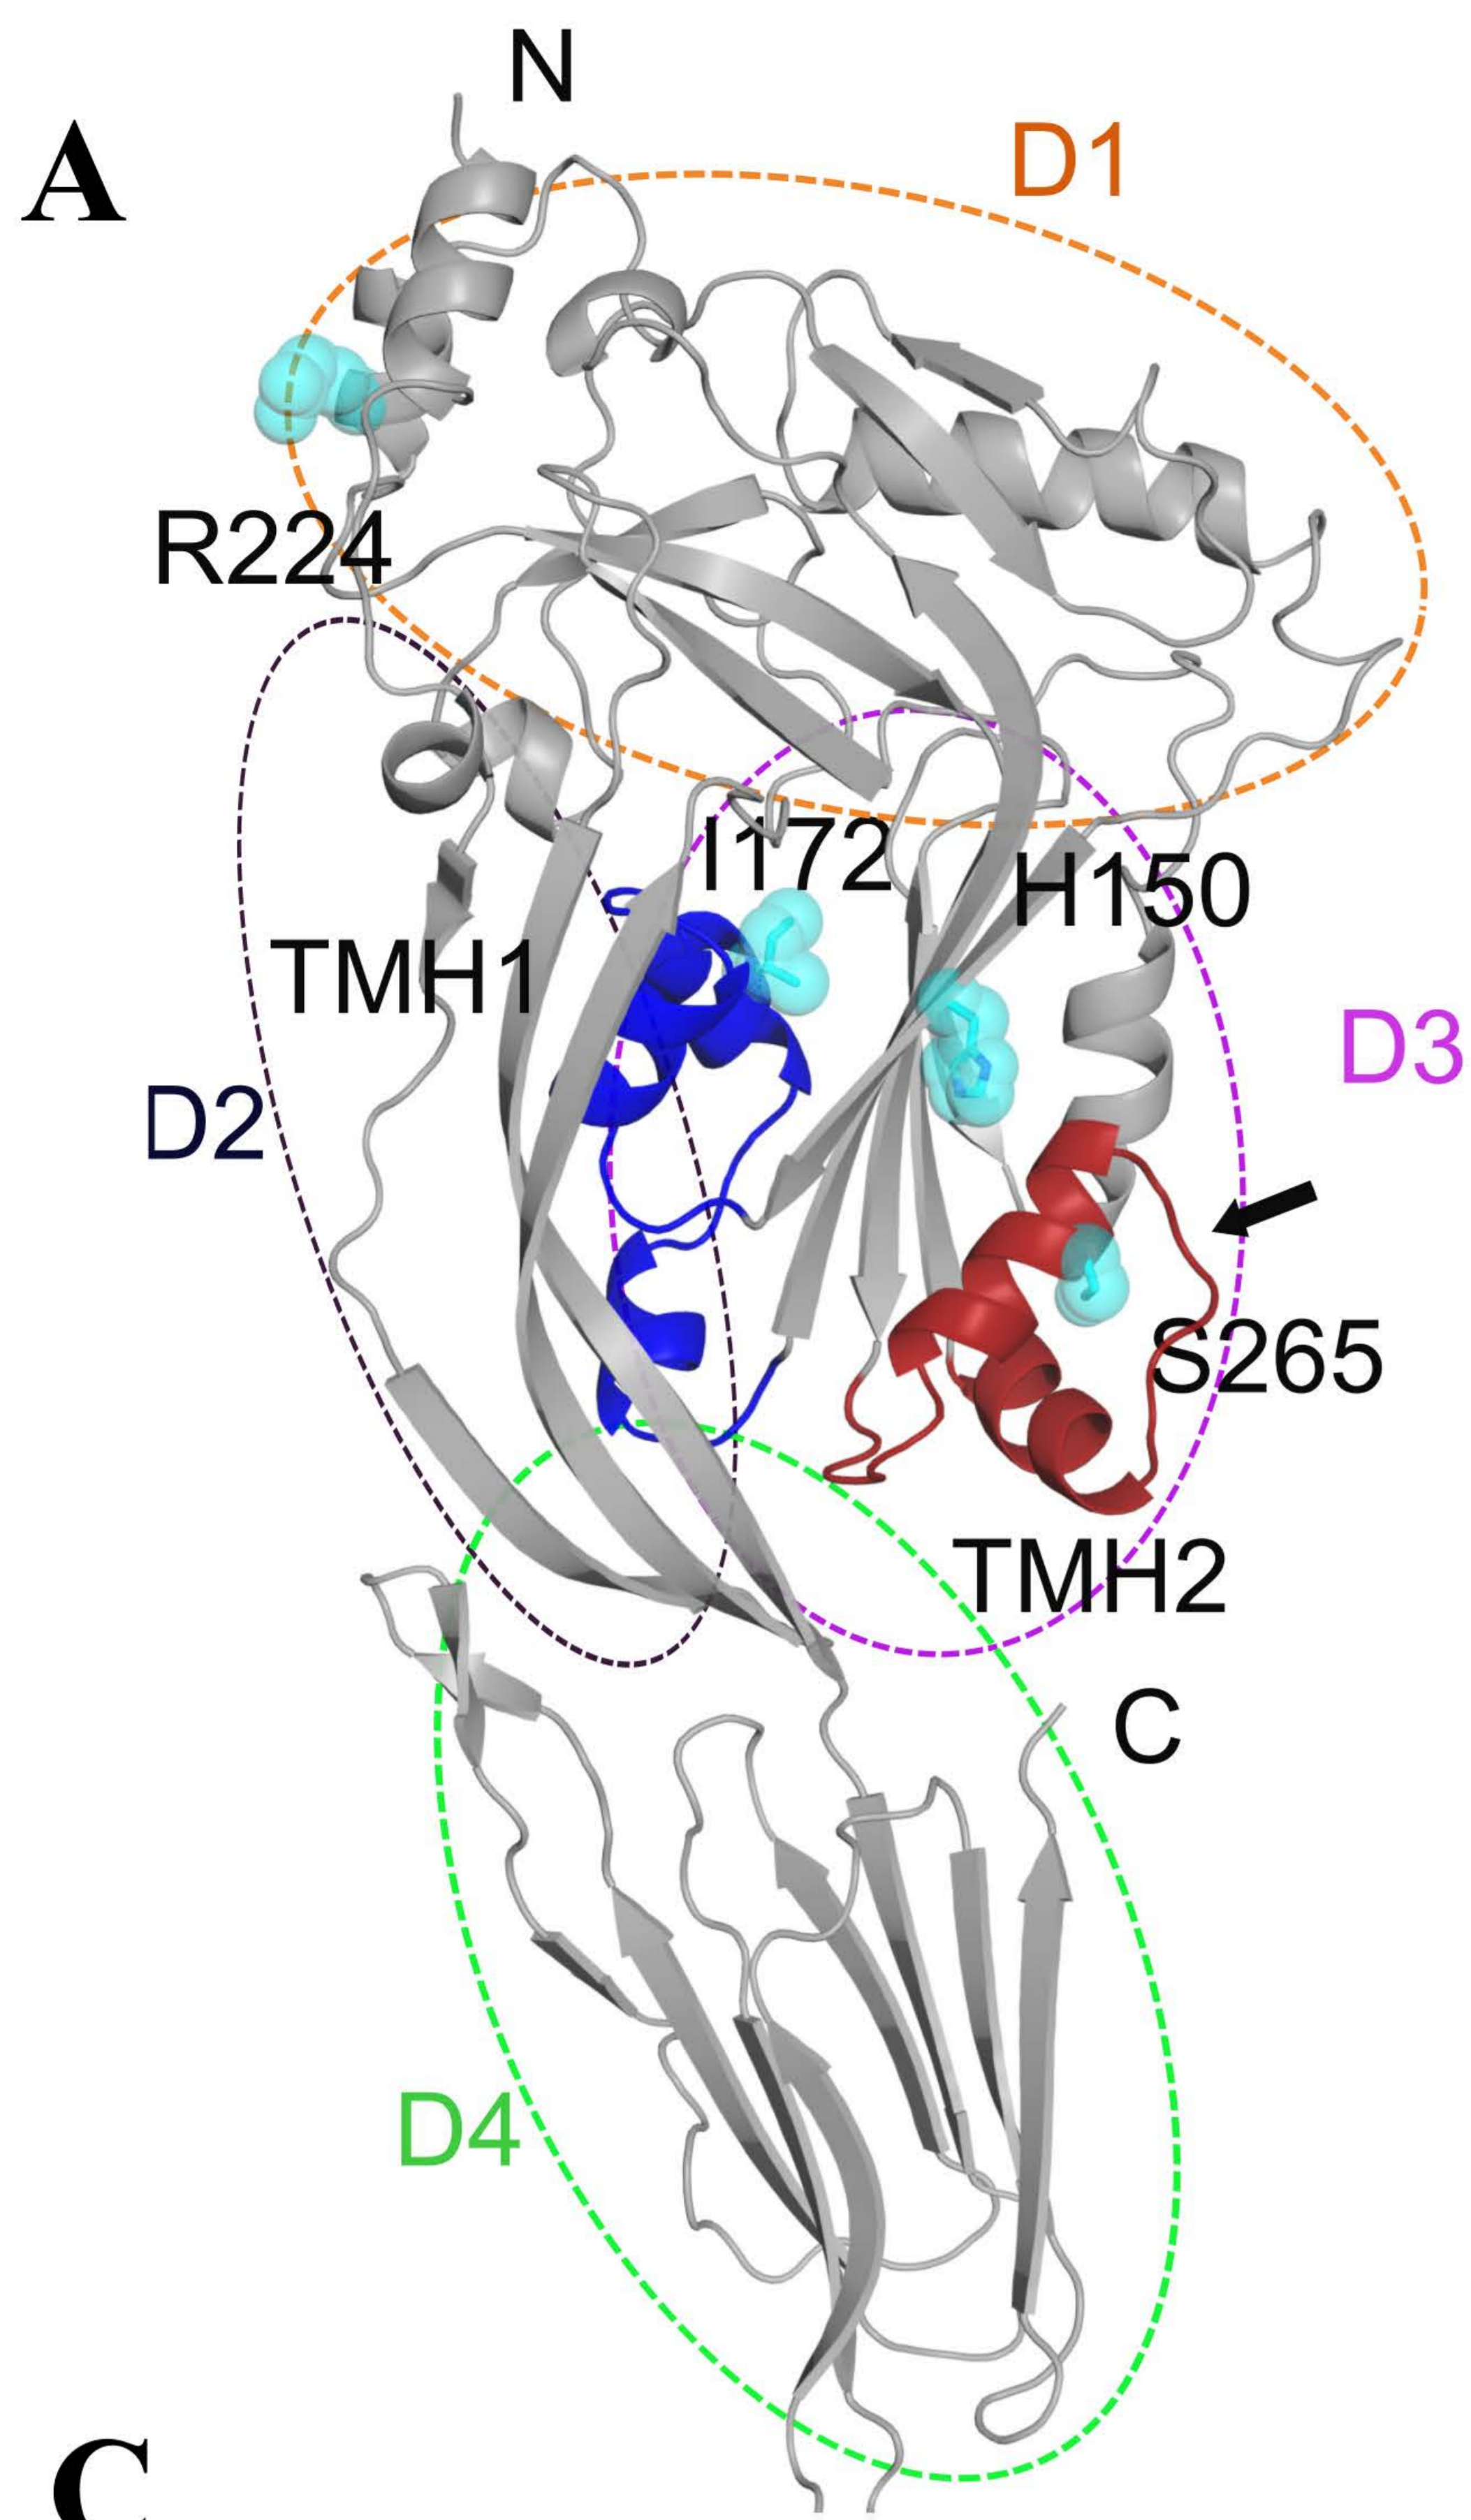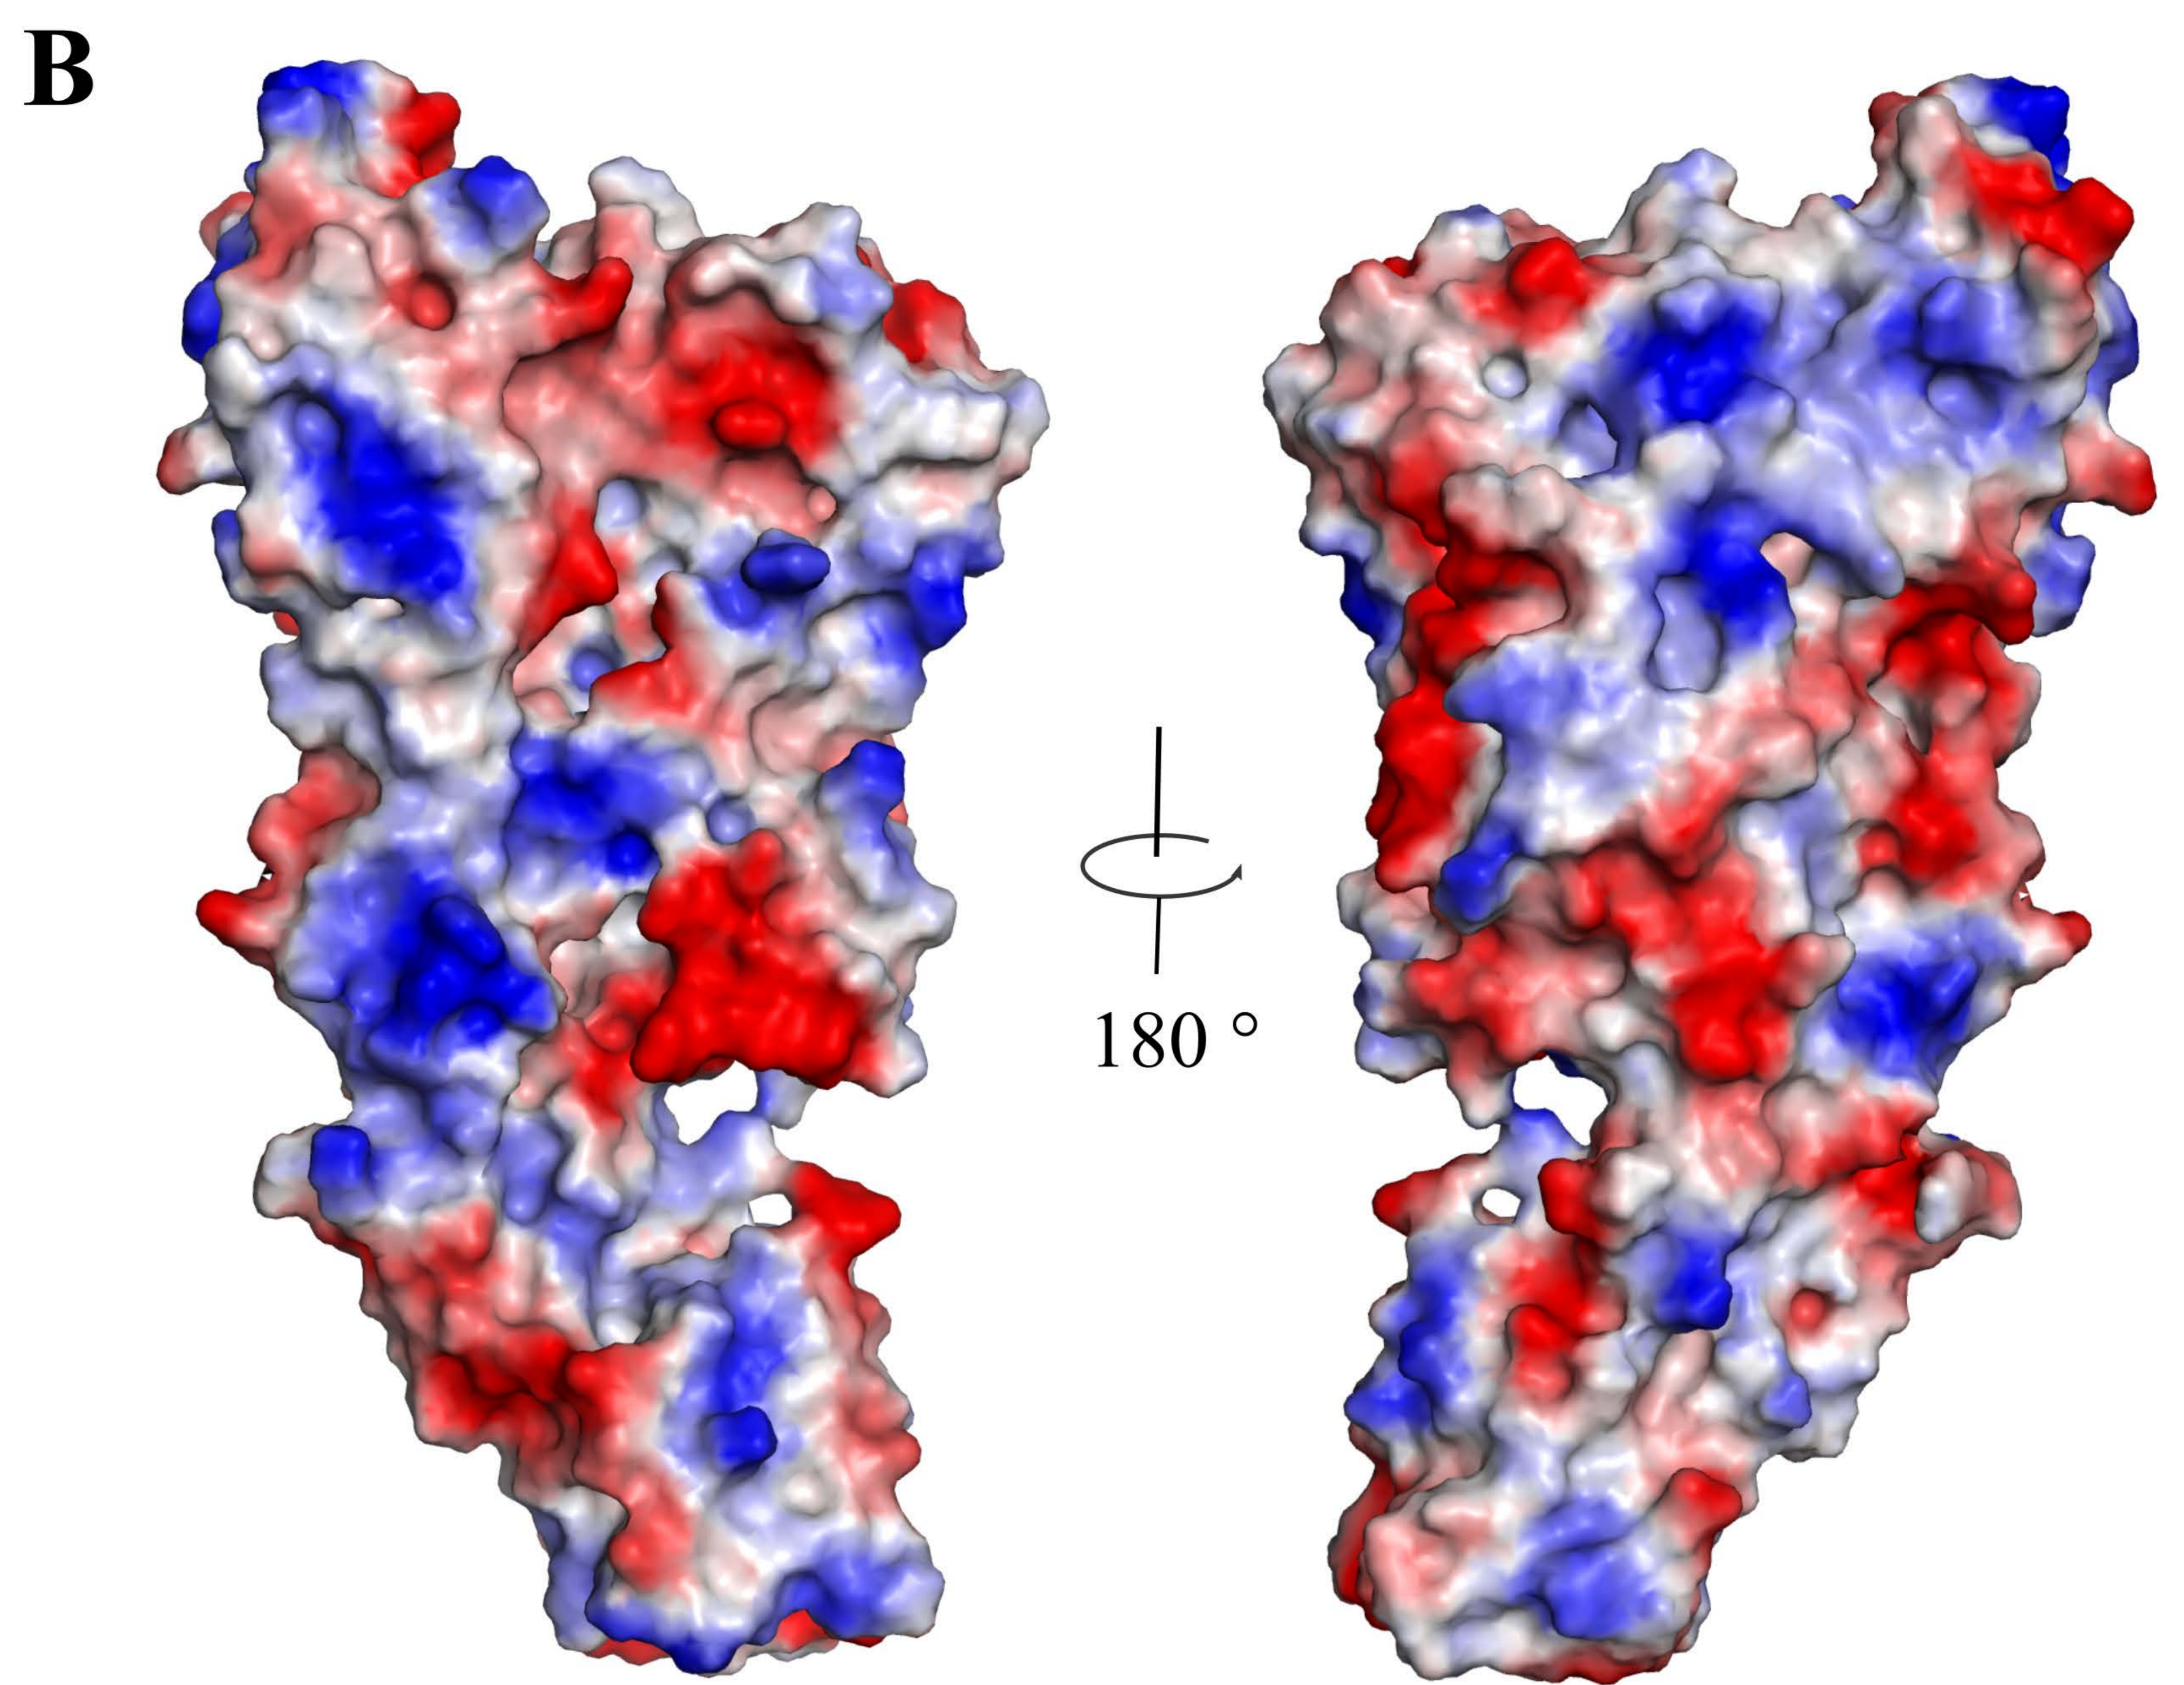

**C**

|                 |     | β8     | α10        | β11         |     |
|-----------------|-----|--------|------------|-------------|-----|
| PLY-NH          | 140 | QVNNVP | ARMQHEKITA | LDNTEVKAVIL | 280 |
| PLY-H           | 140 | QVNNVP | ARMQYEKITA | LDNTEVKAVIL | 282 |
| Mitilysin       | 140 | QVNNVP | ARMQYEKITA | LDNTEVKAVIL | 282 |
| Vaginolysin     | 185 | ASHHVA | ARMQYDSASA | LQNTSVAVIL  | 327 |
| Intermedilysin  | 191 | KTHAVP | ARMQYESISA | LKNTKITAVVL | 333 |
| Suilysin        | 172 | EYGNLQ | AELQYDETMA | LKNTSFSAYIF | 314 |
| Anthrolysin     | 155 | THT.LP | ARMQYTESMV | FEESTFTAVVL | 296 |
| Perfringolysin  | 172 | THT.LP | ARTQYSESMV | YENSSFTAVVL | 313 |
| Tetanolysin     | 313 | KYT.IP | ARVSYTDSMV | LNQSSFTATVL | 454 |
| Seeligeriolysin | 197 | AYPNIN | AKIDYSDEMA | IKNSSFKAVIY | 339 |
| Listeriolysin   | 196 | AYPNVS | AKIDYDDEMA | IKNSSFKAVIY | 338 |

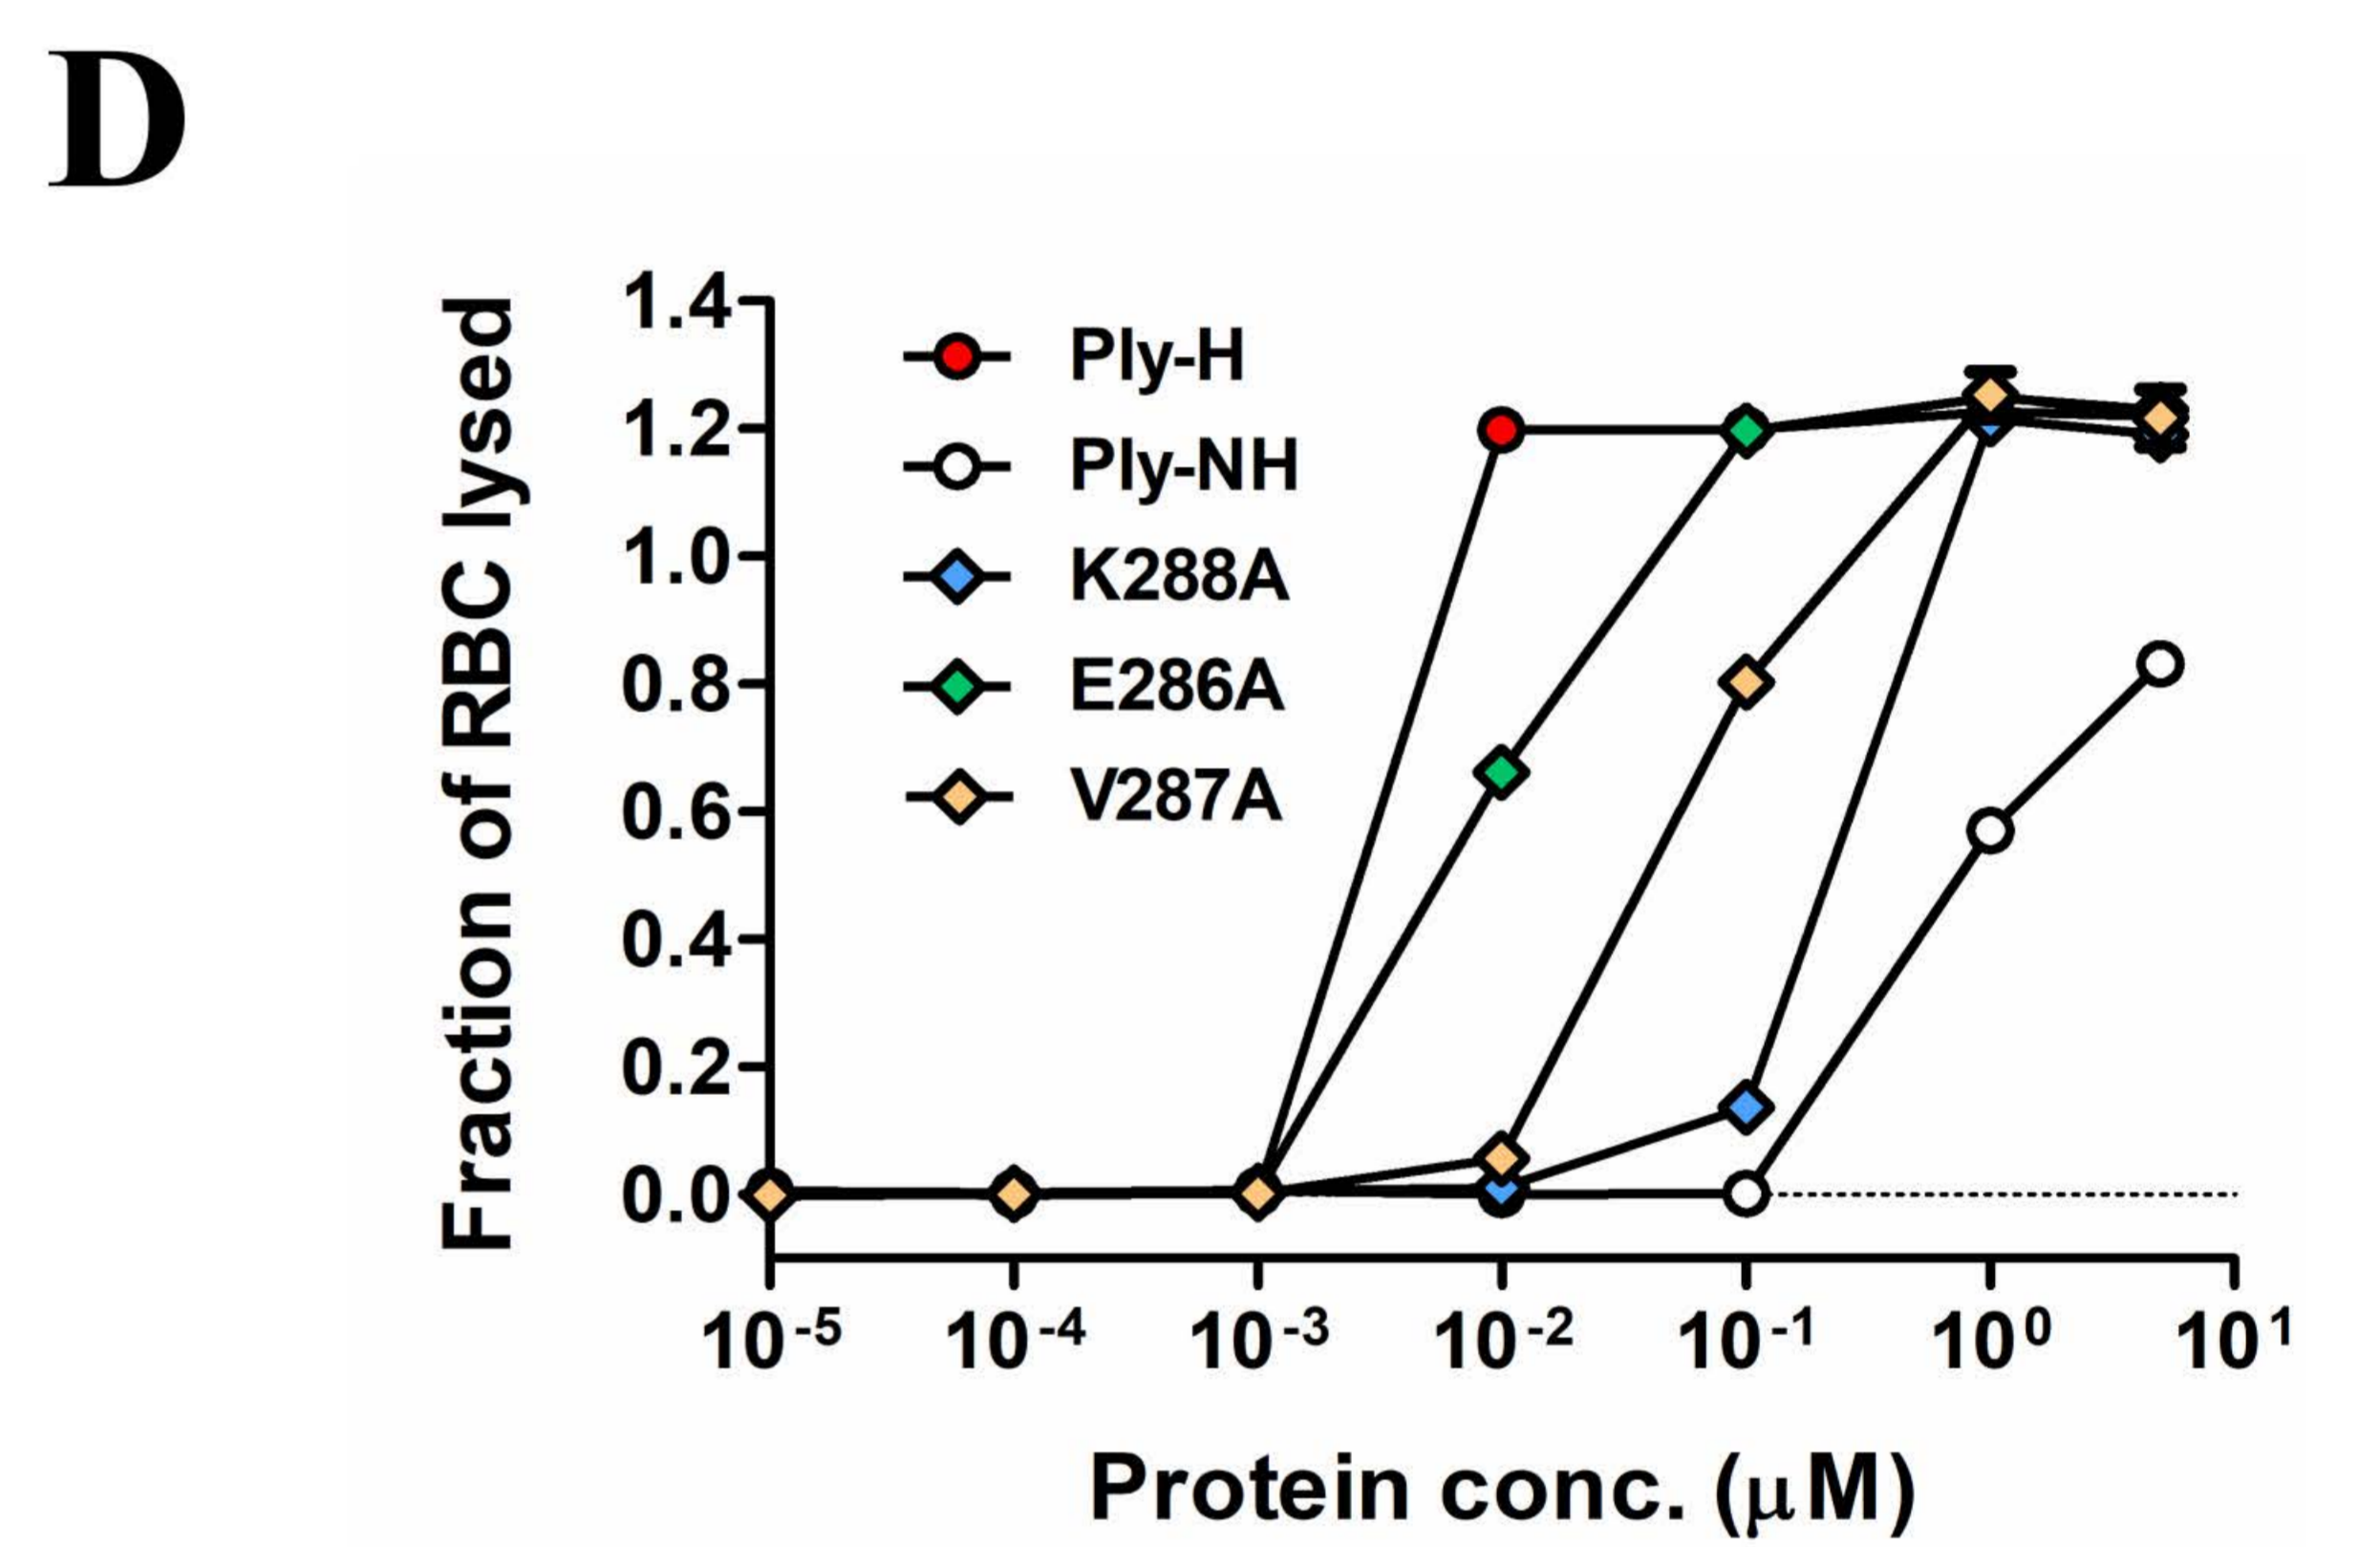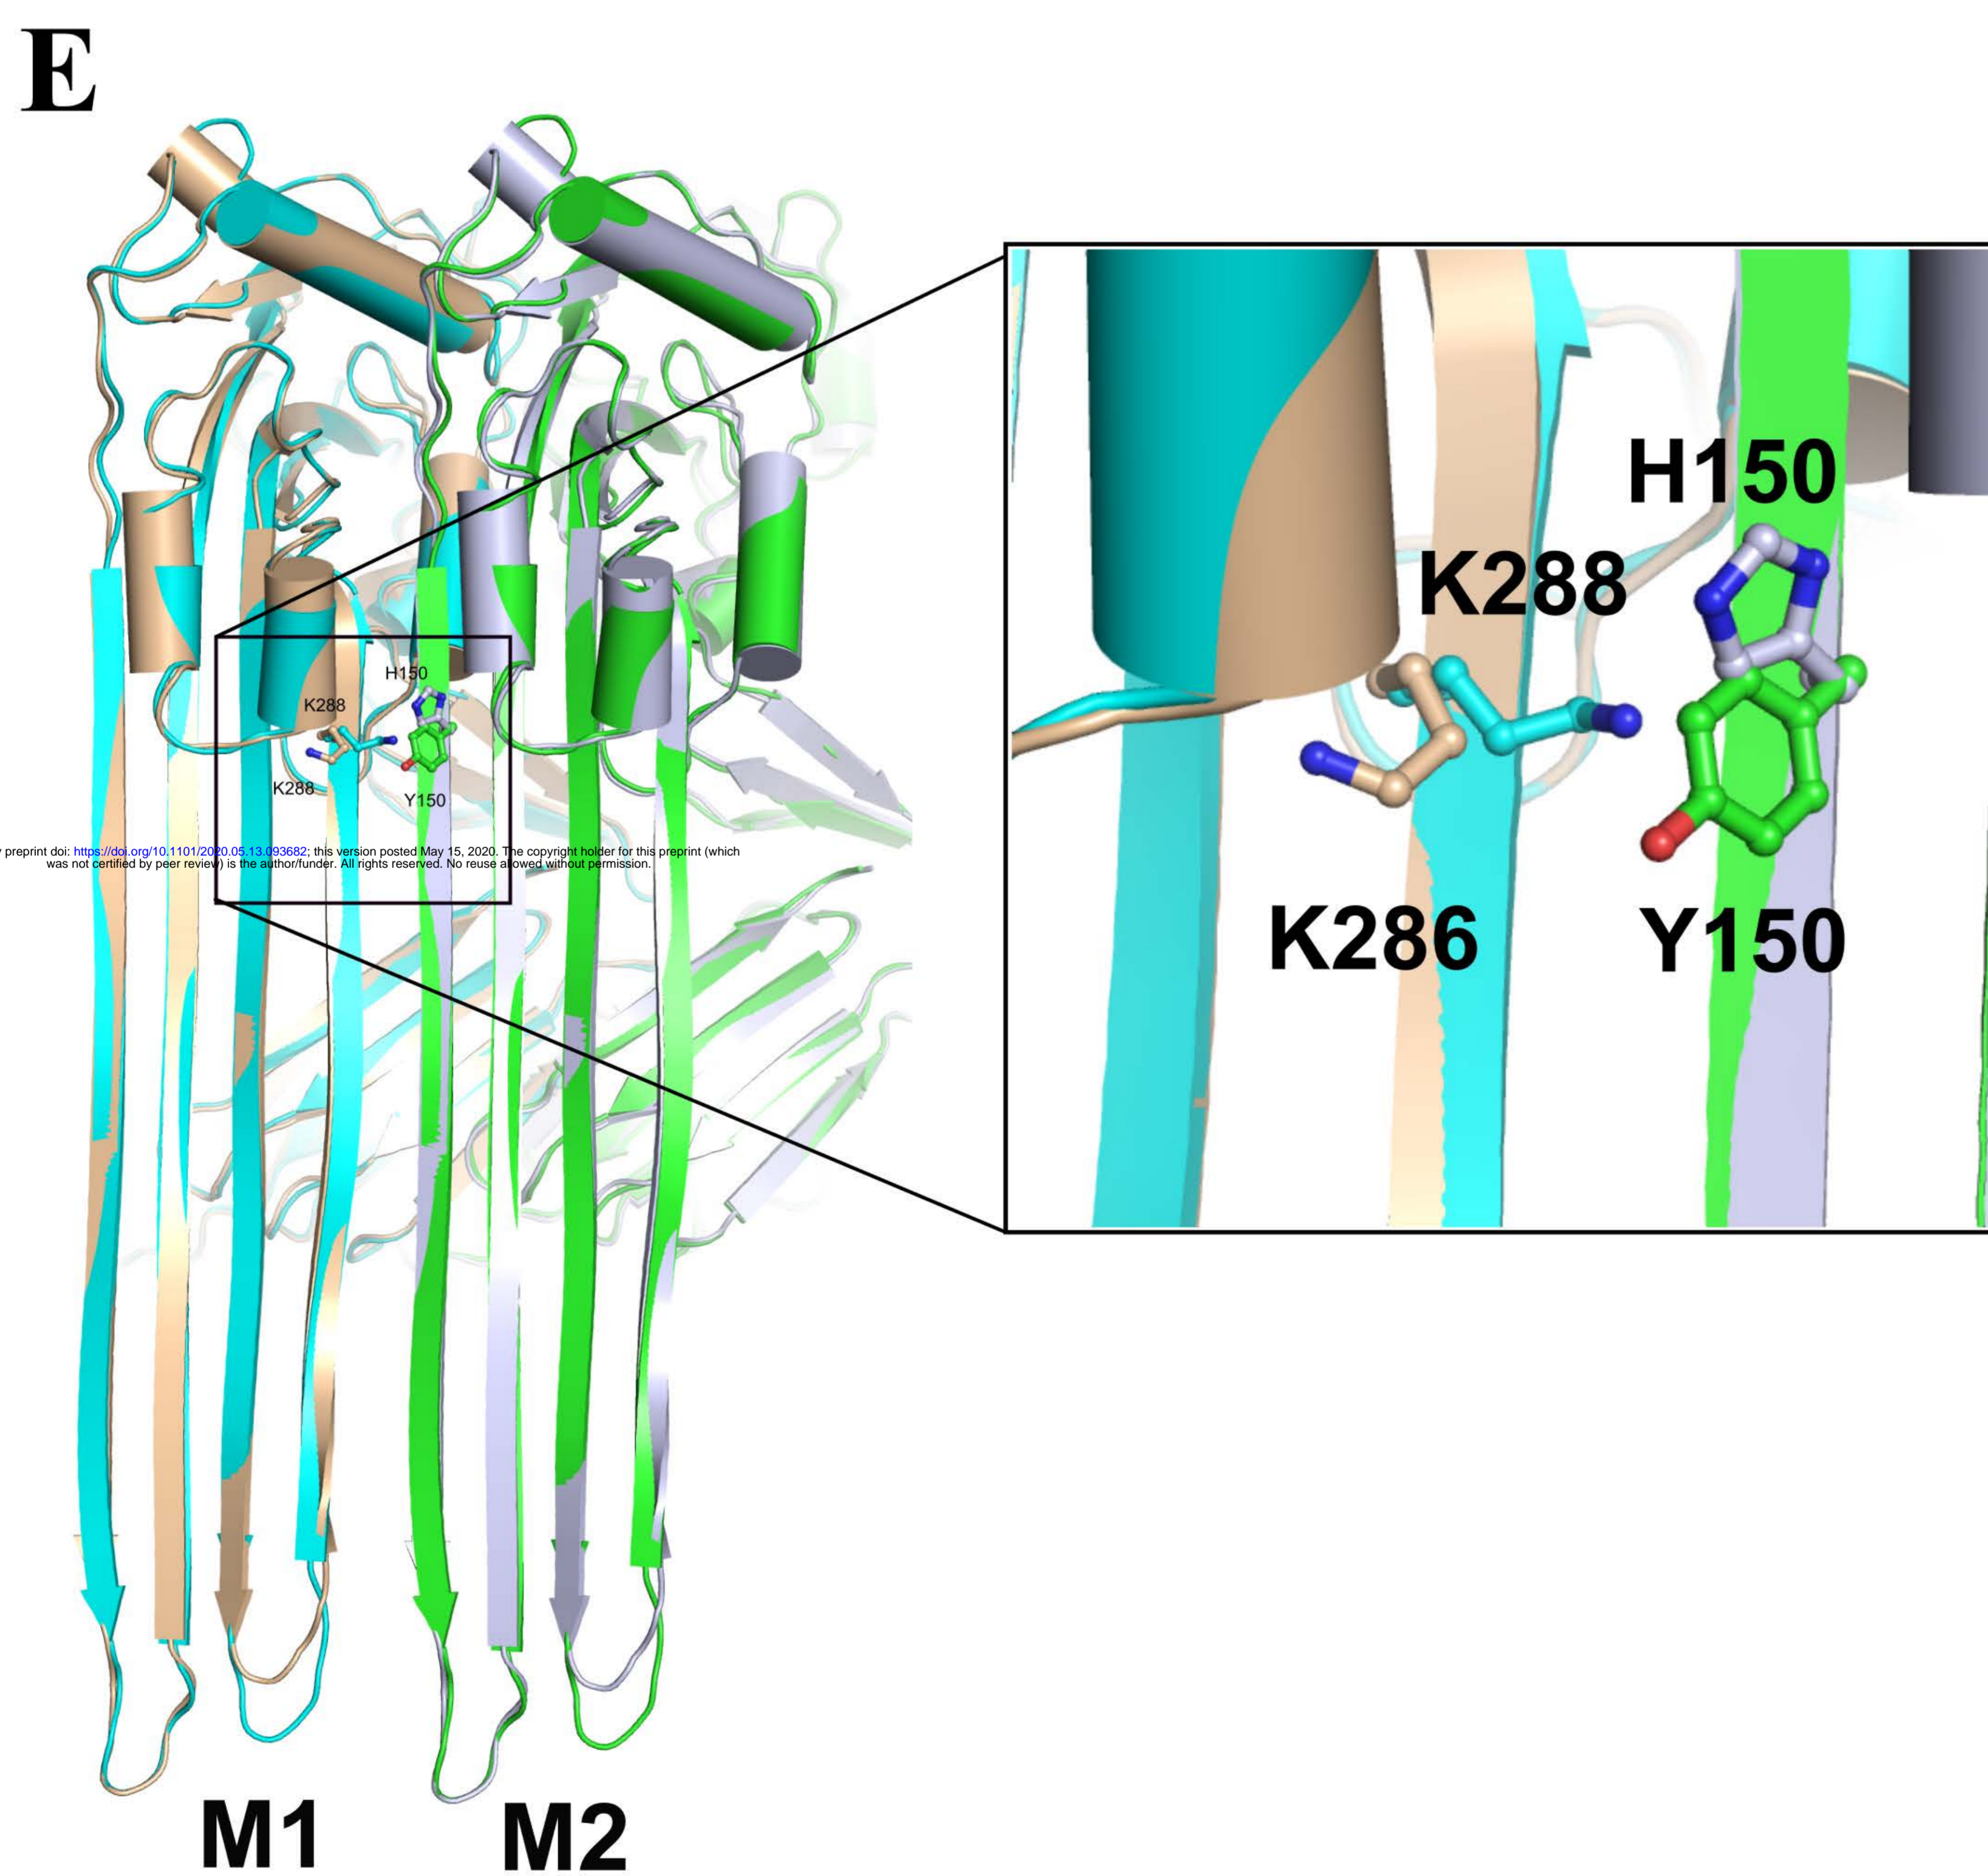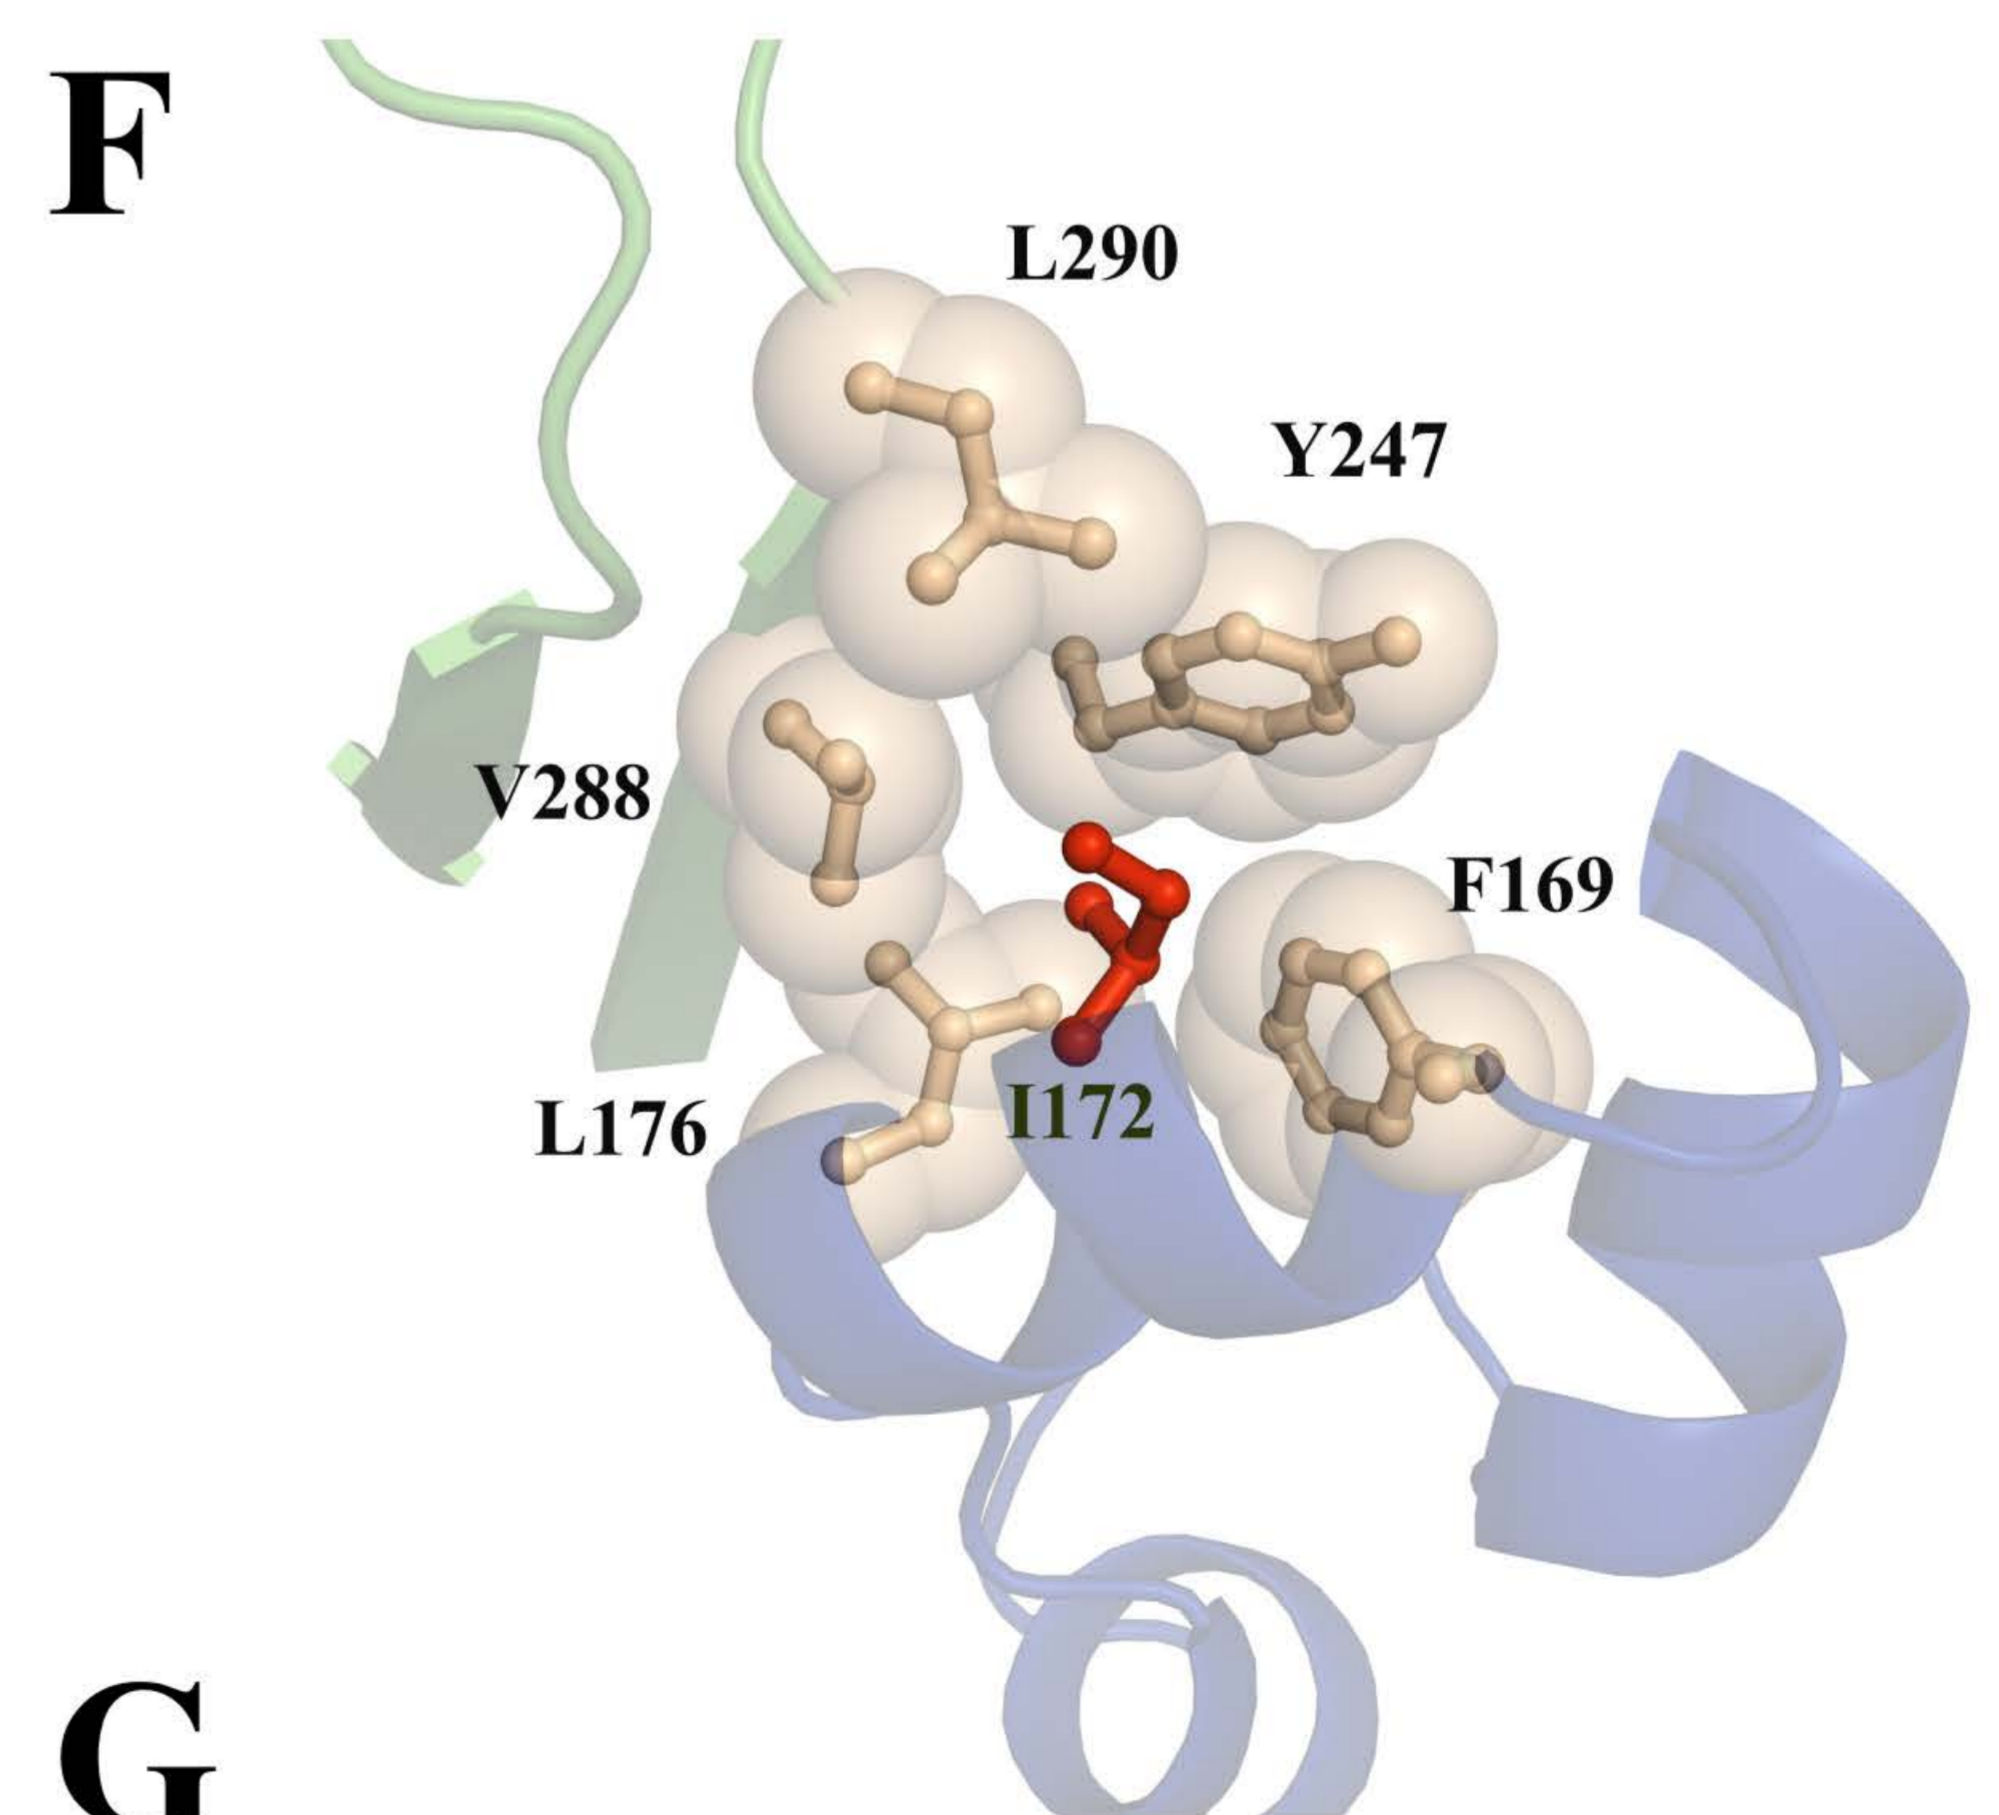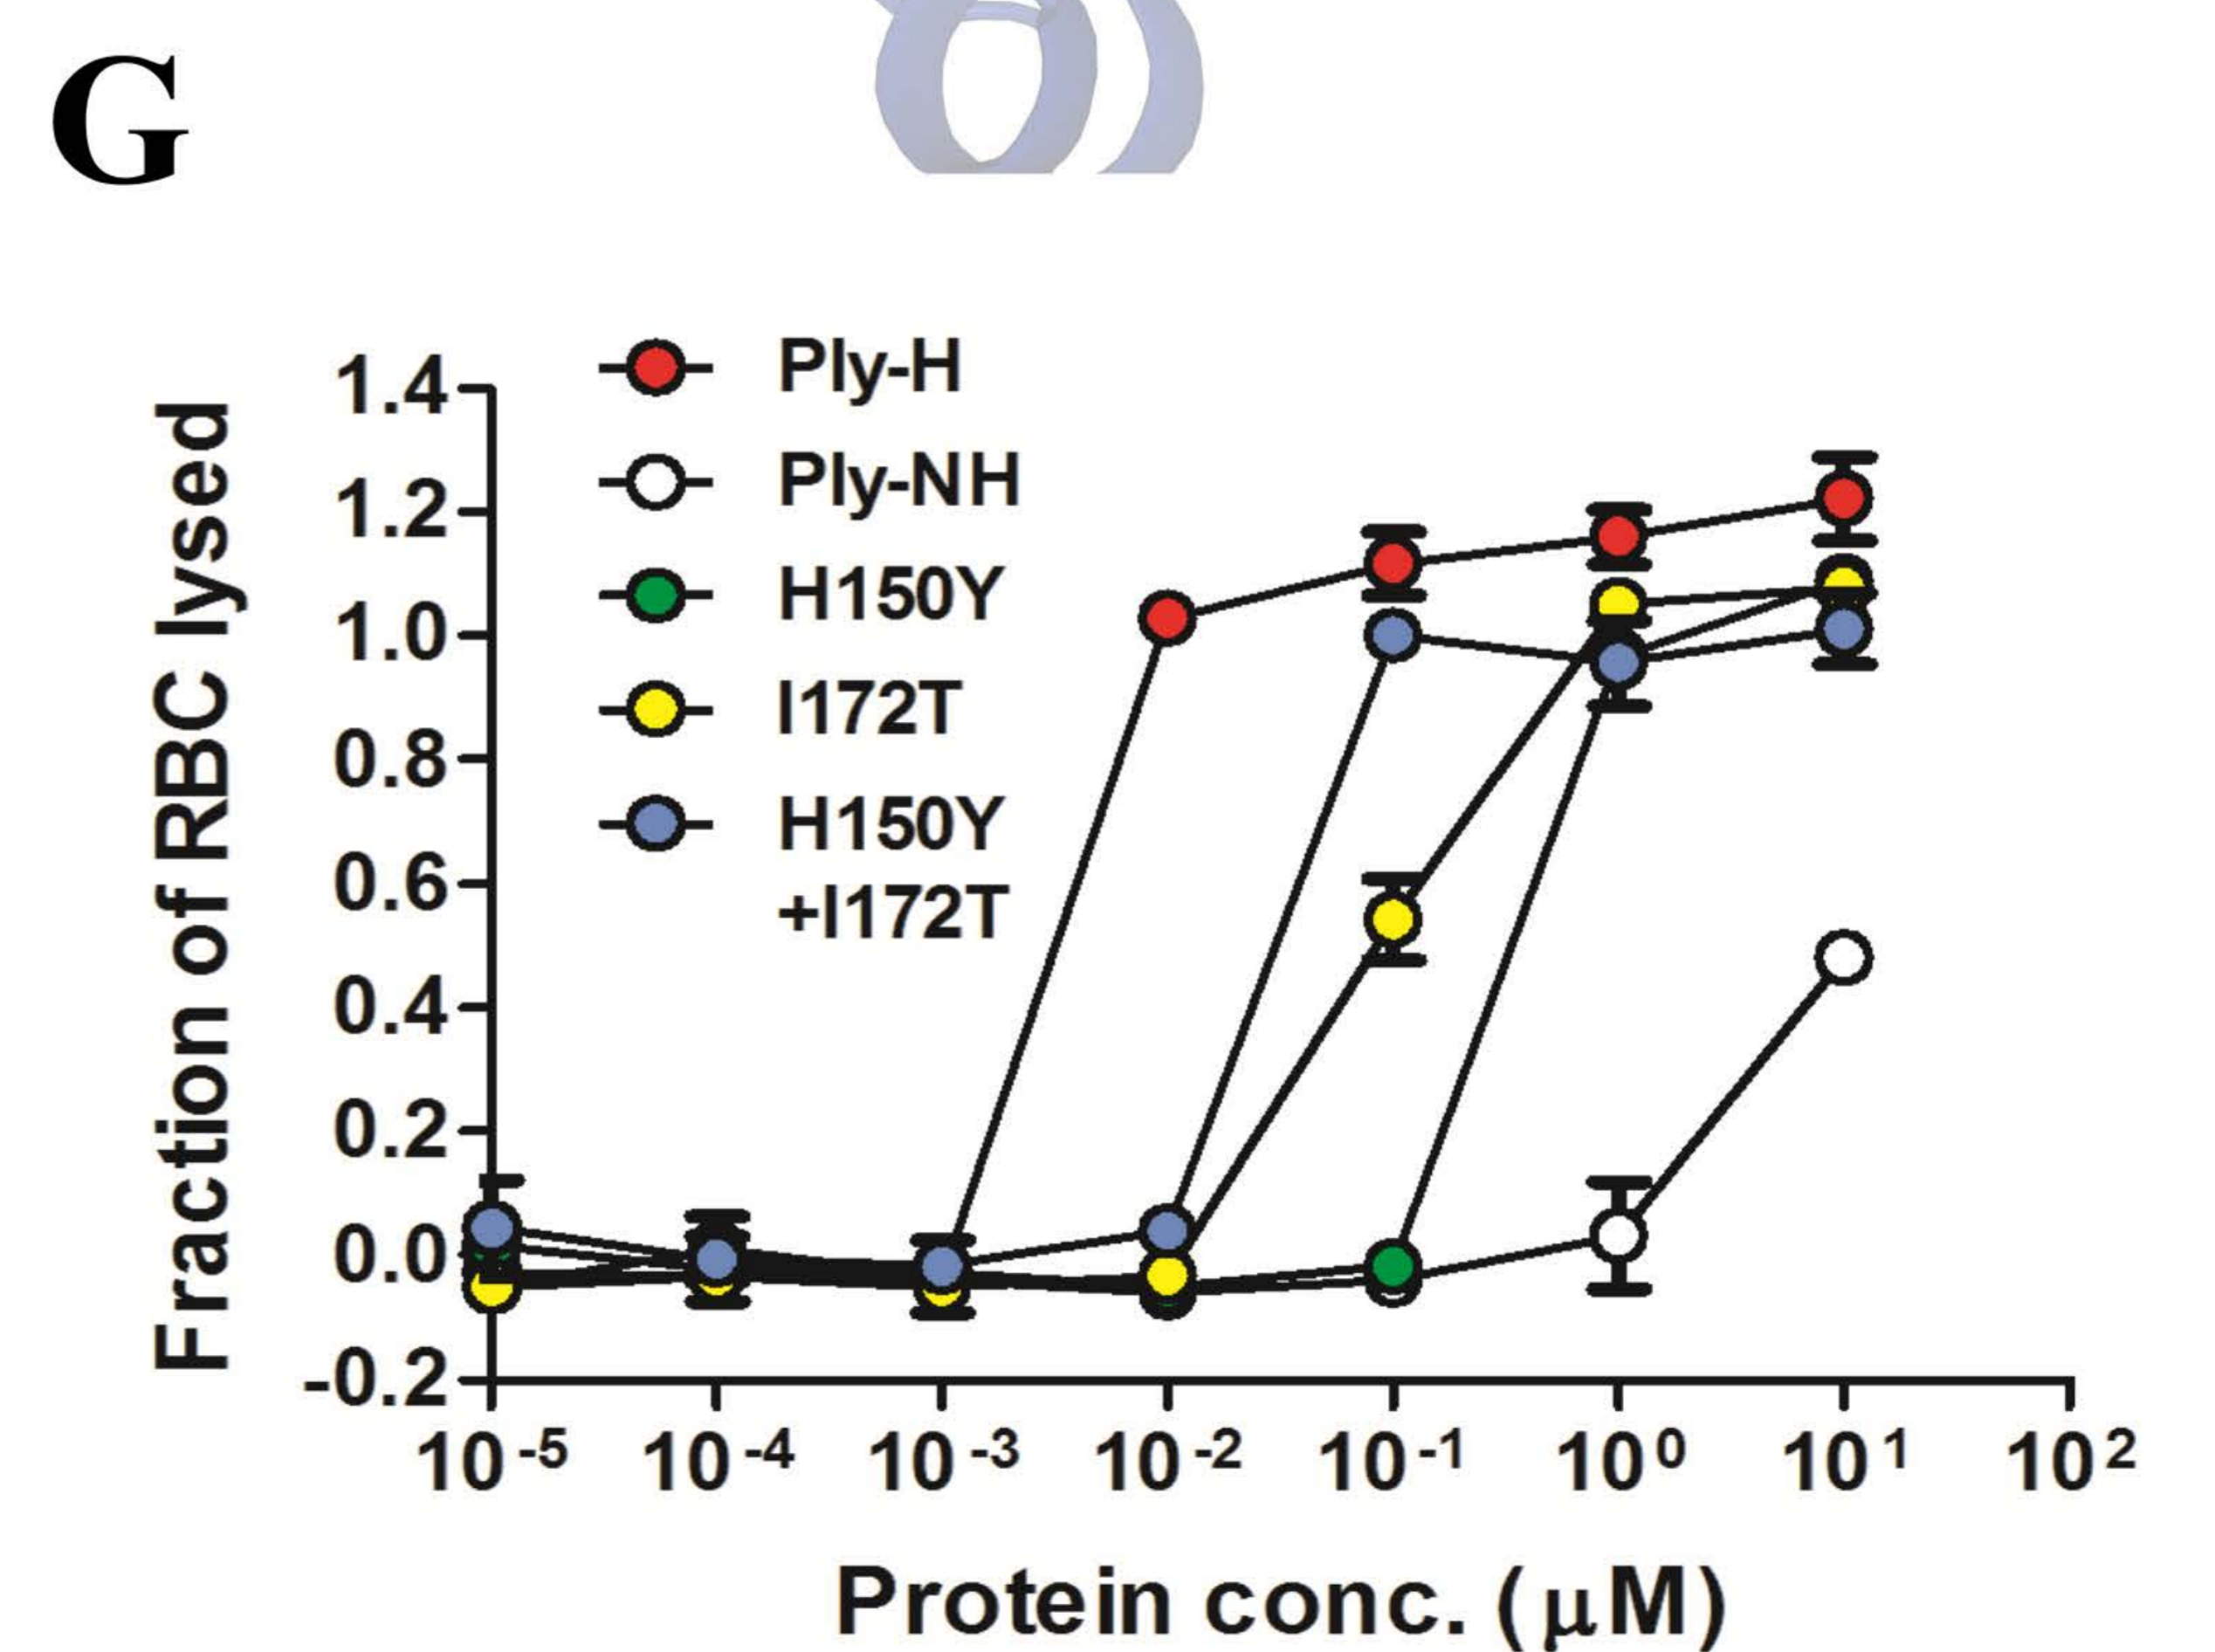

**A**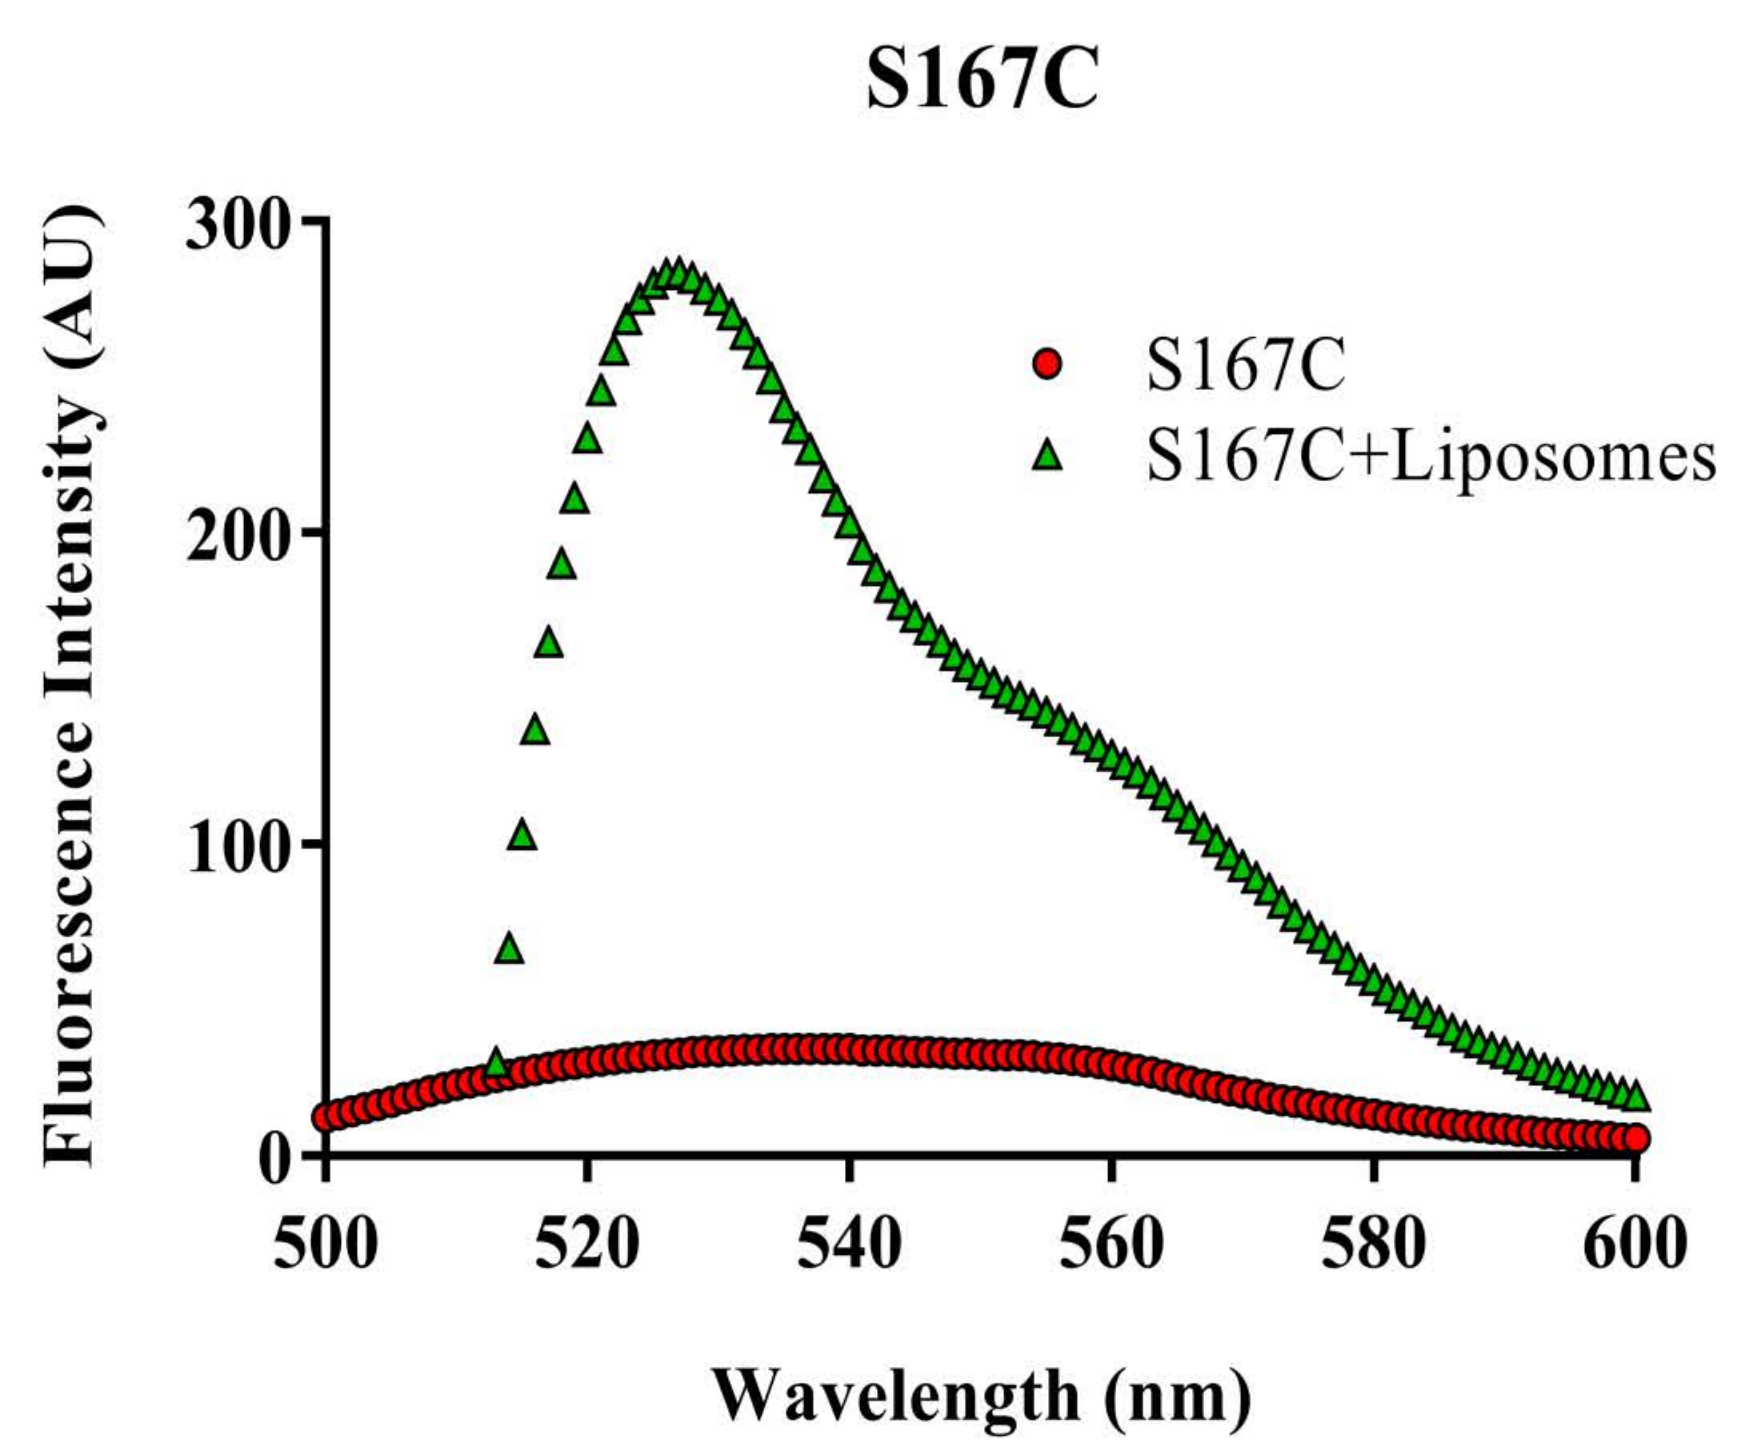**C**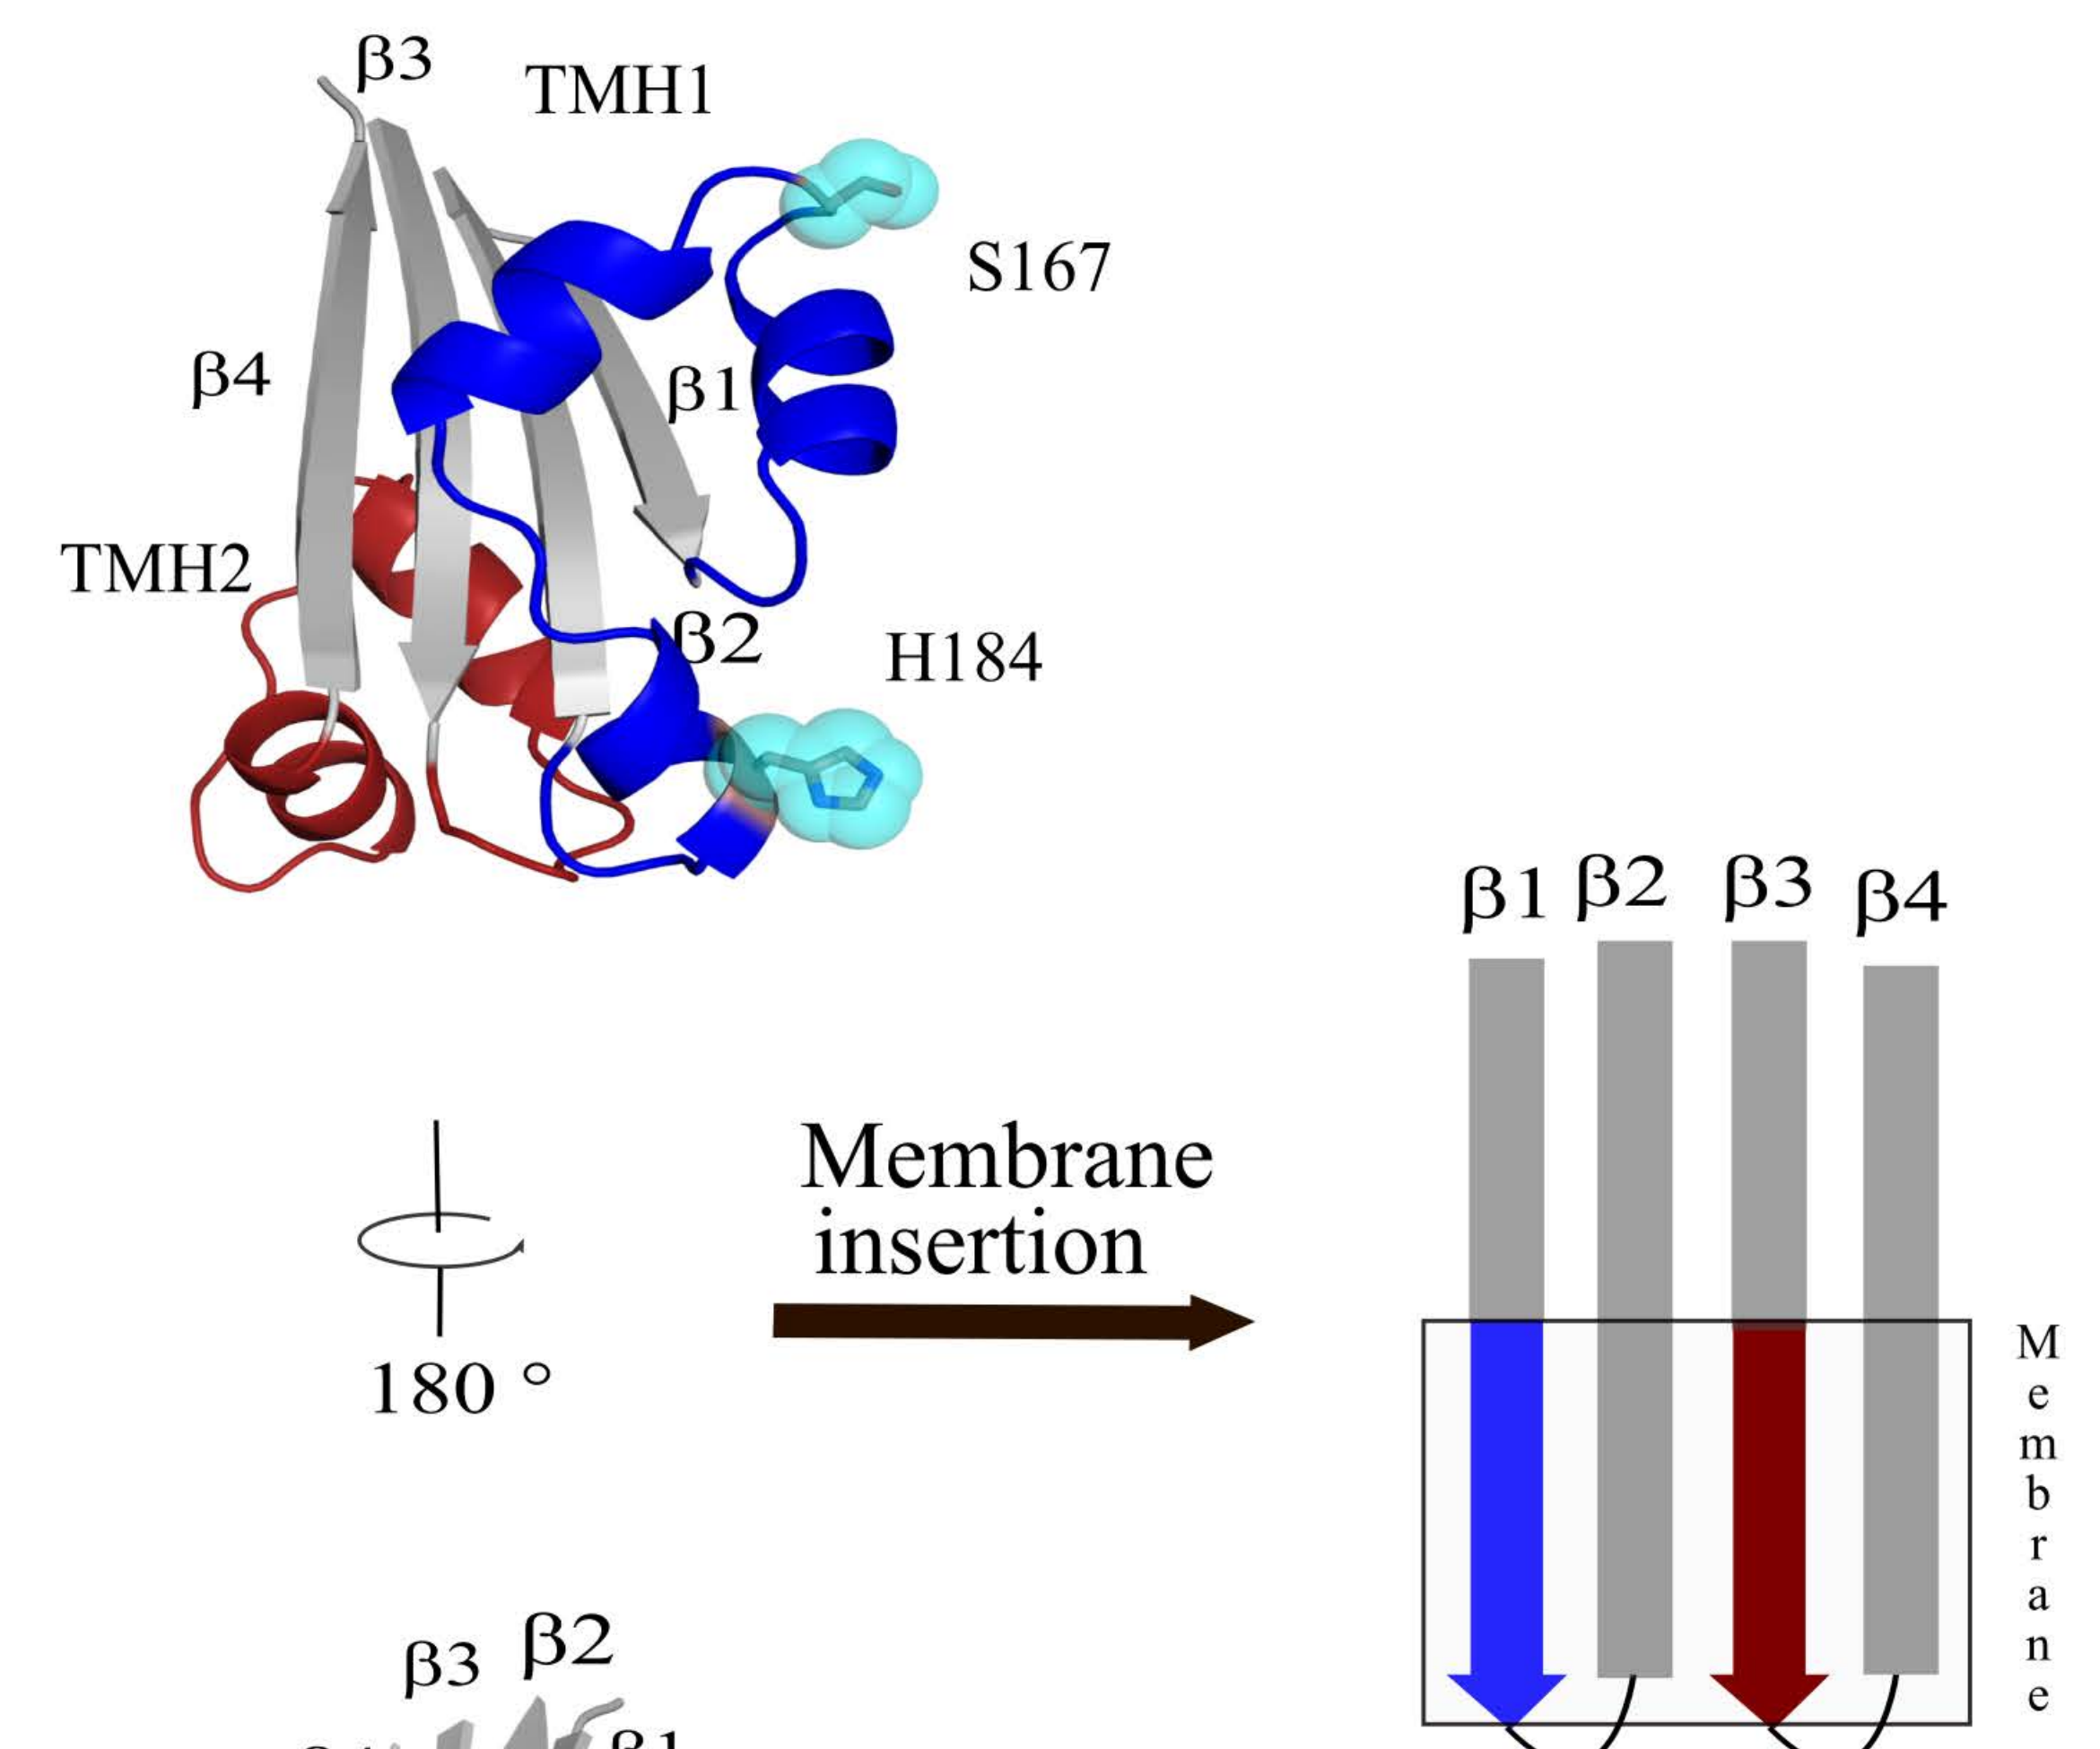**B**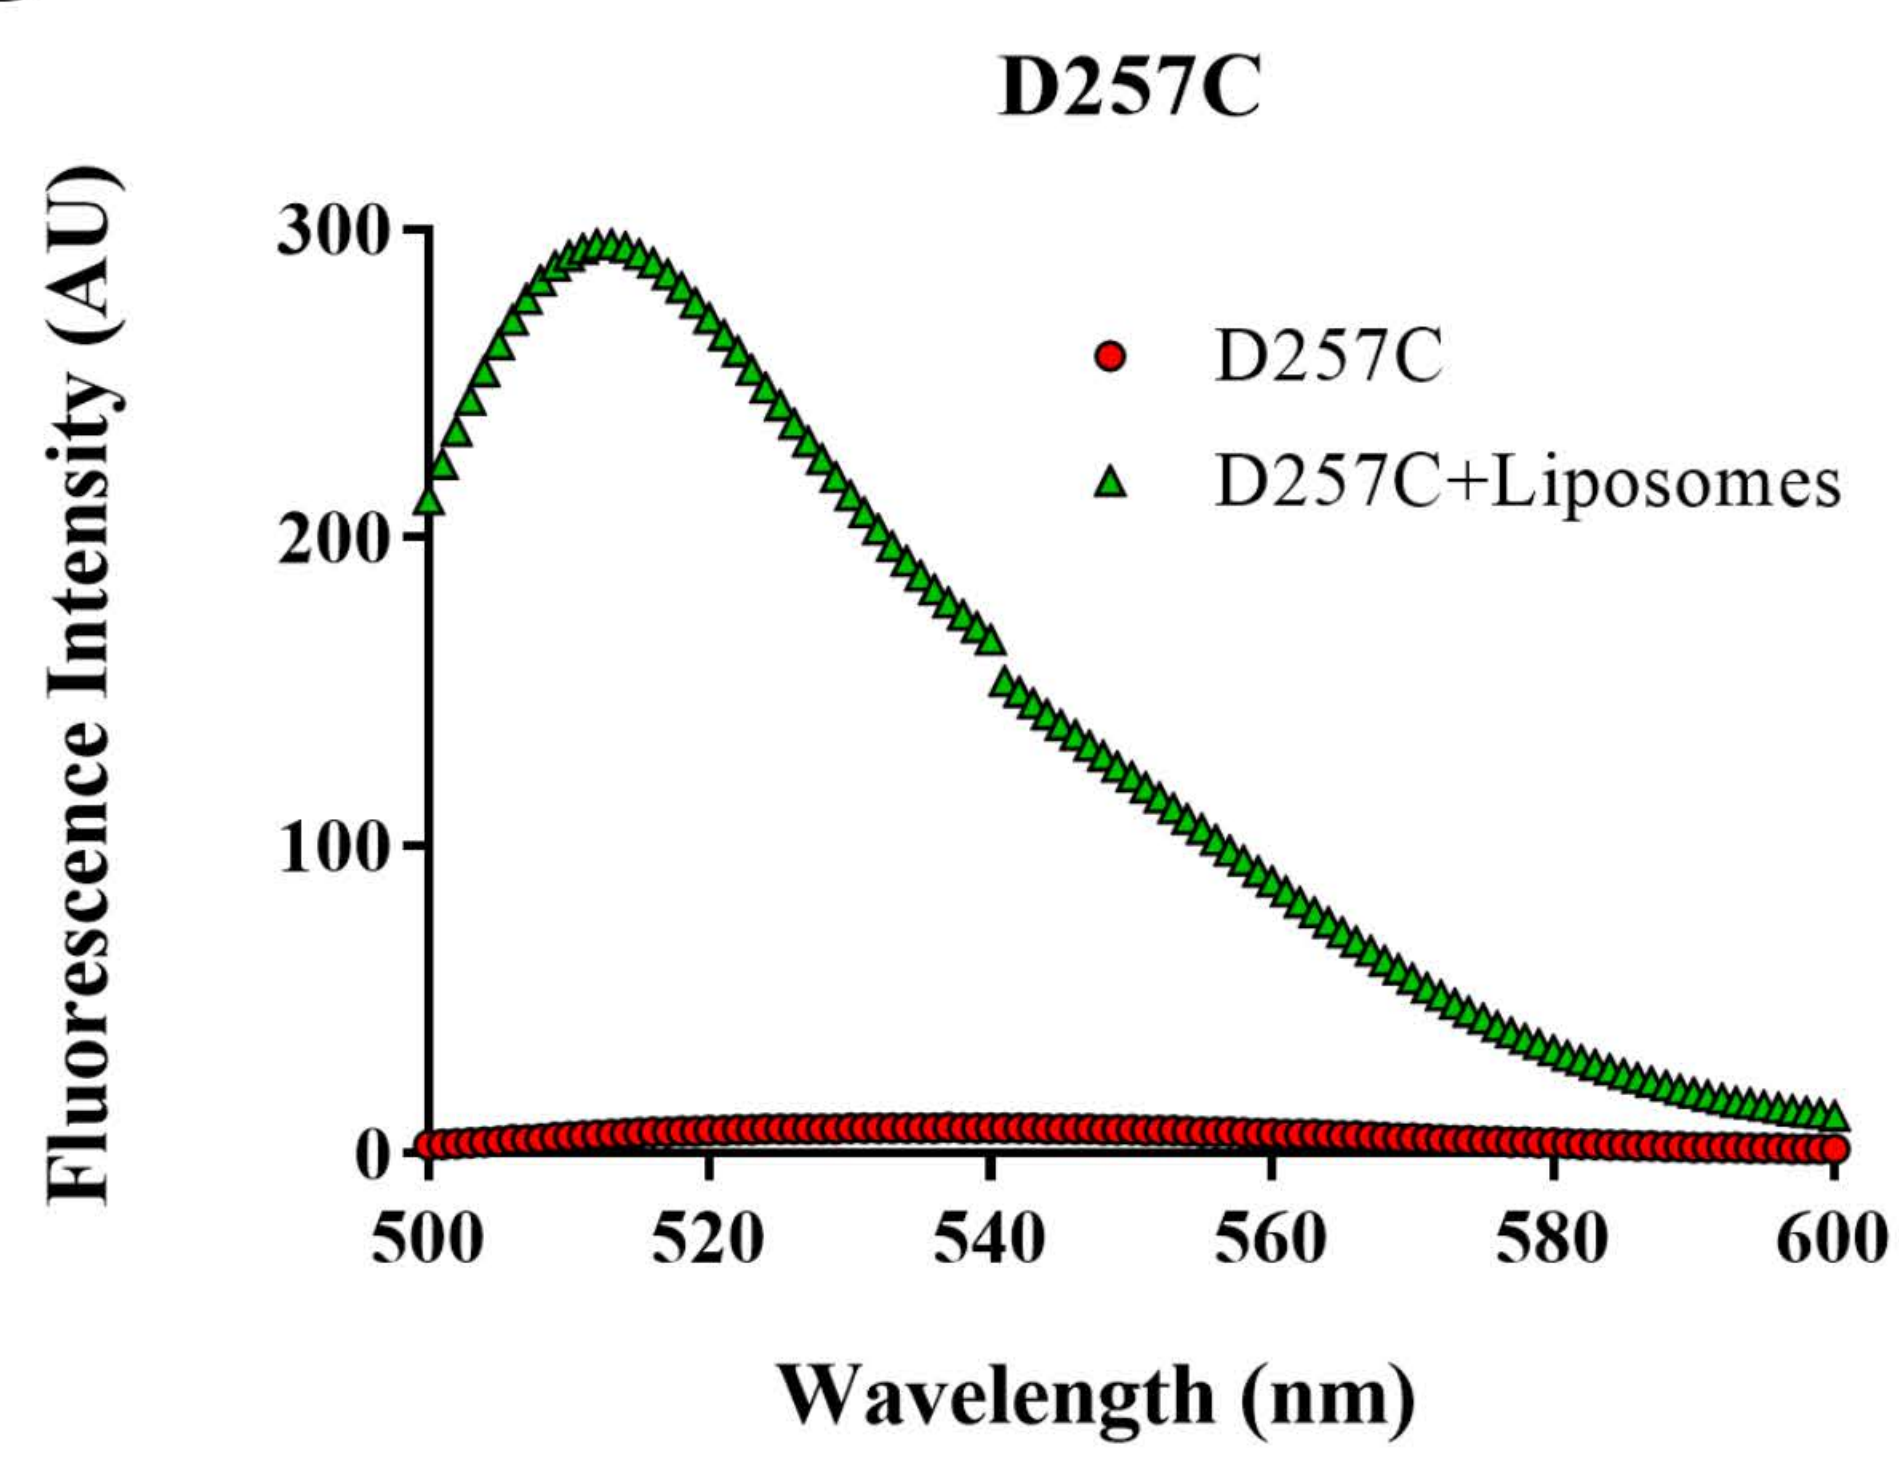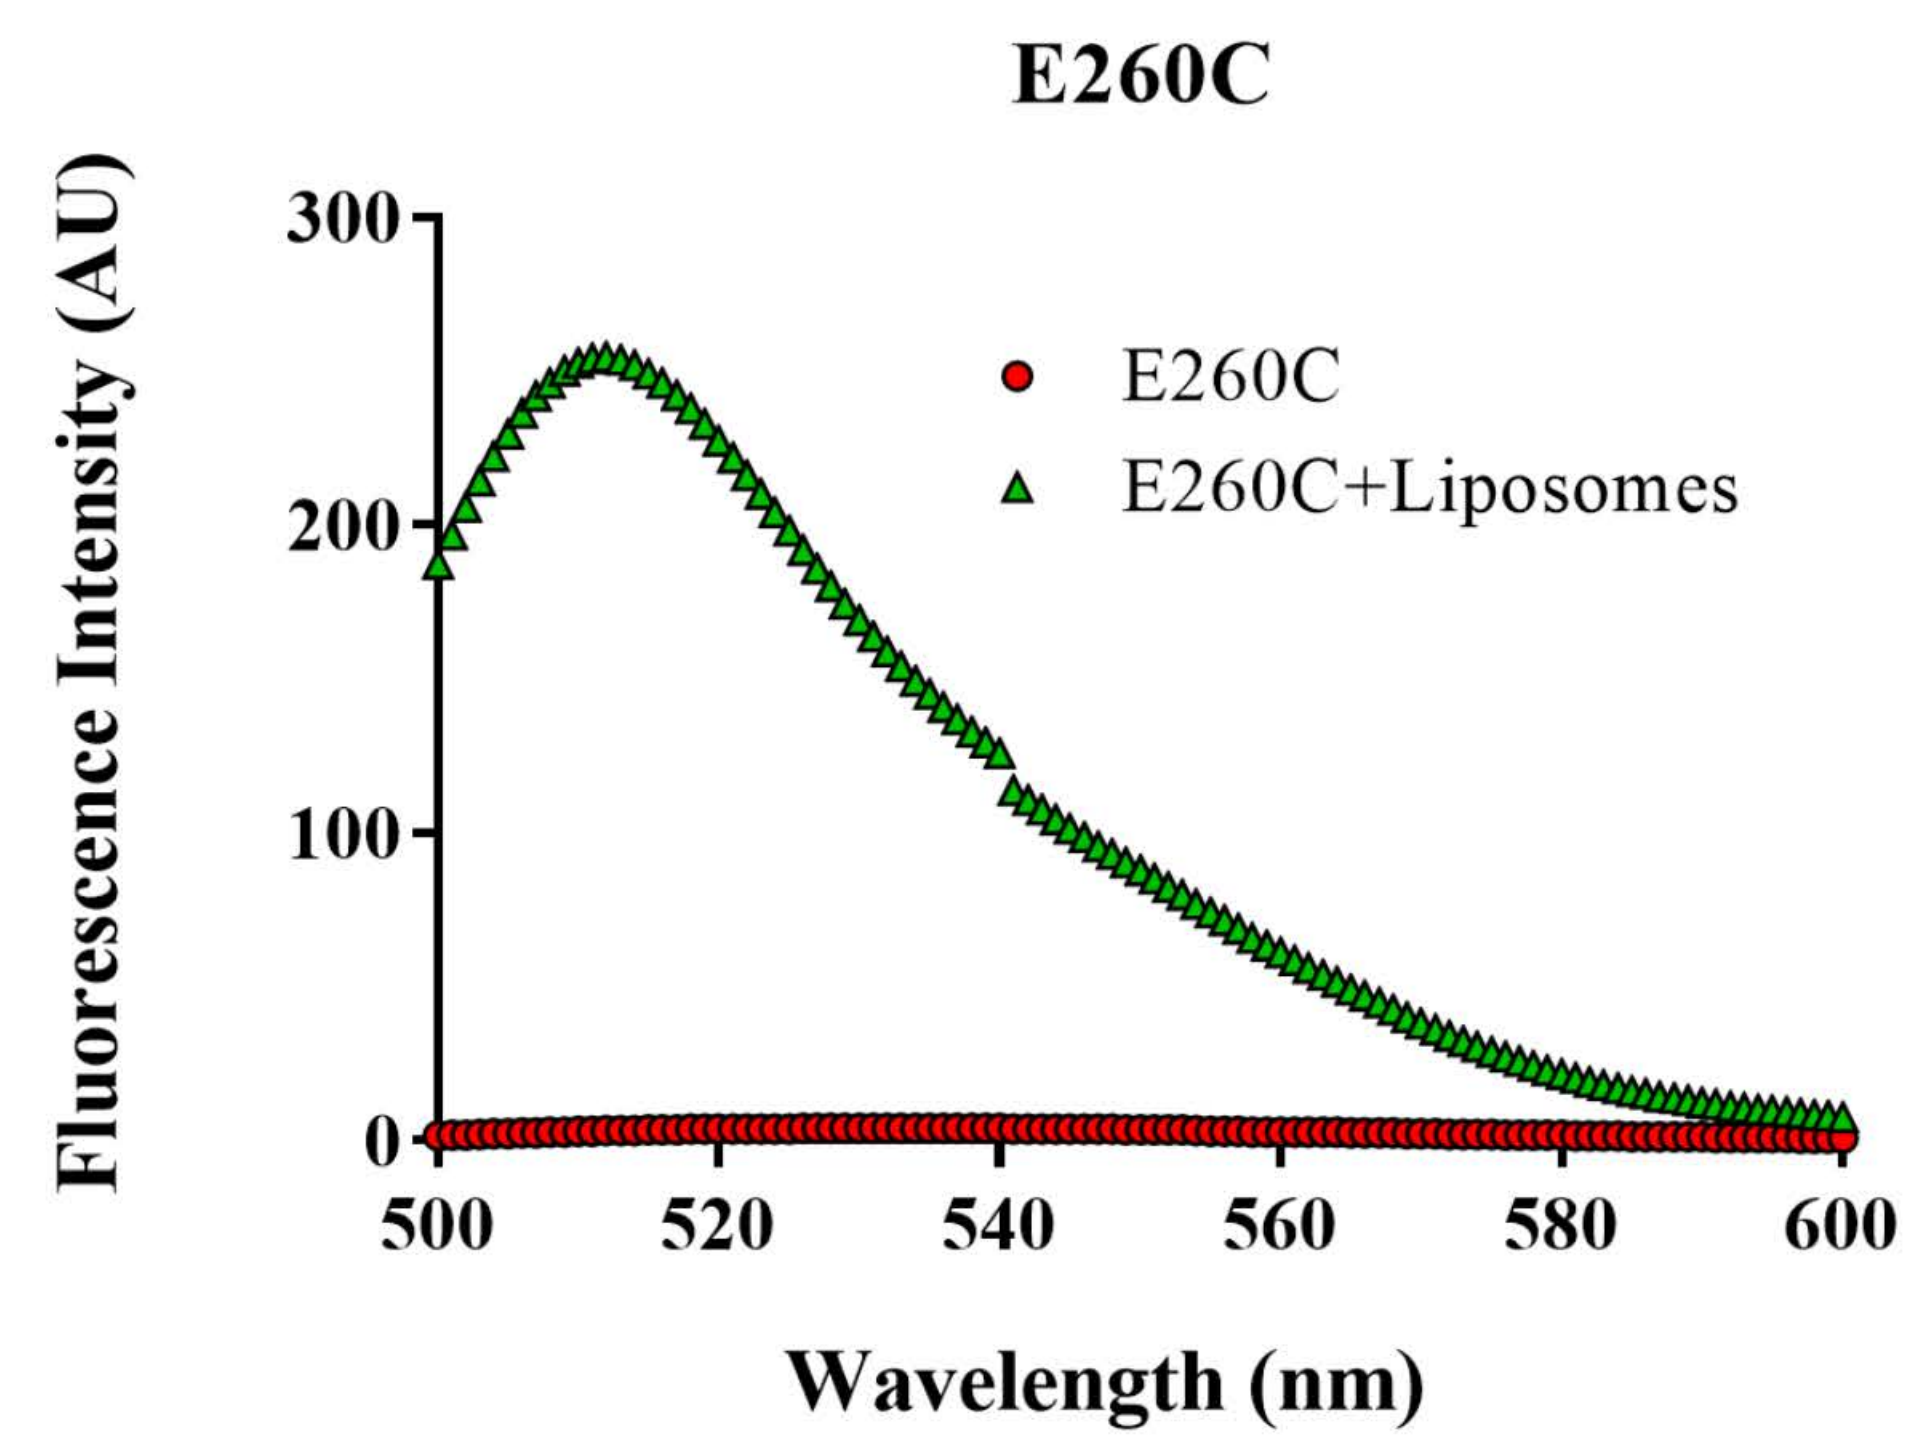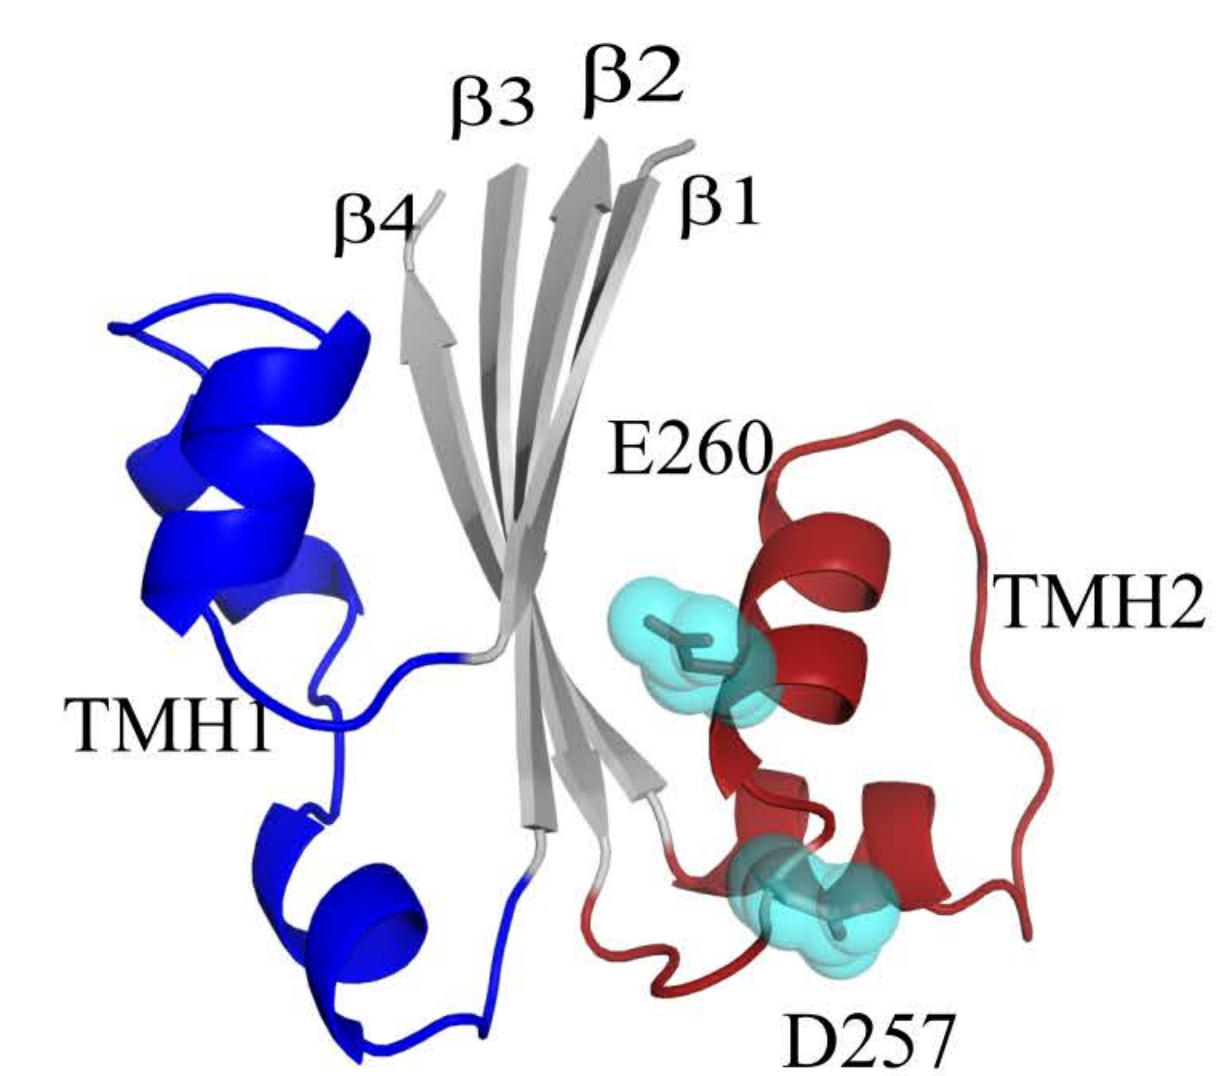**D**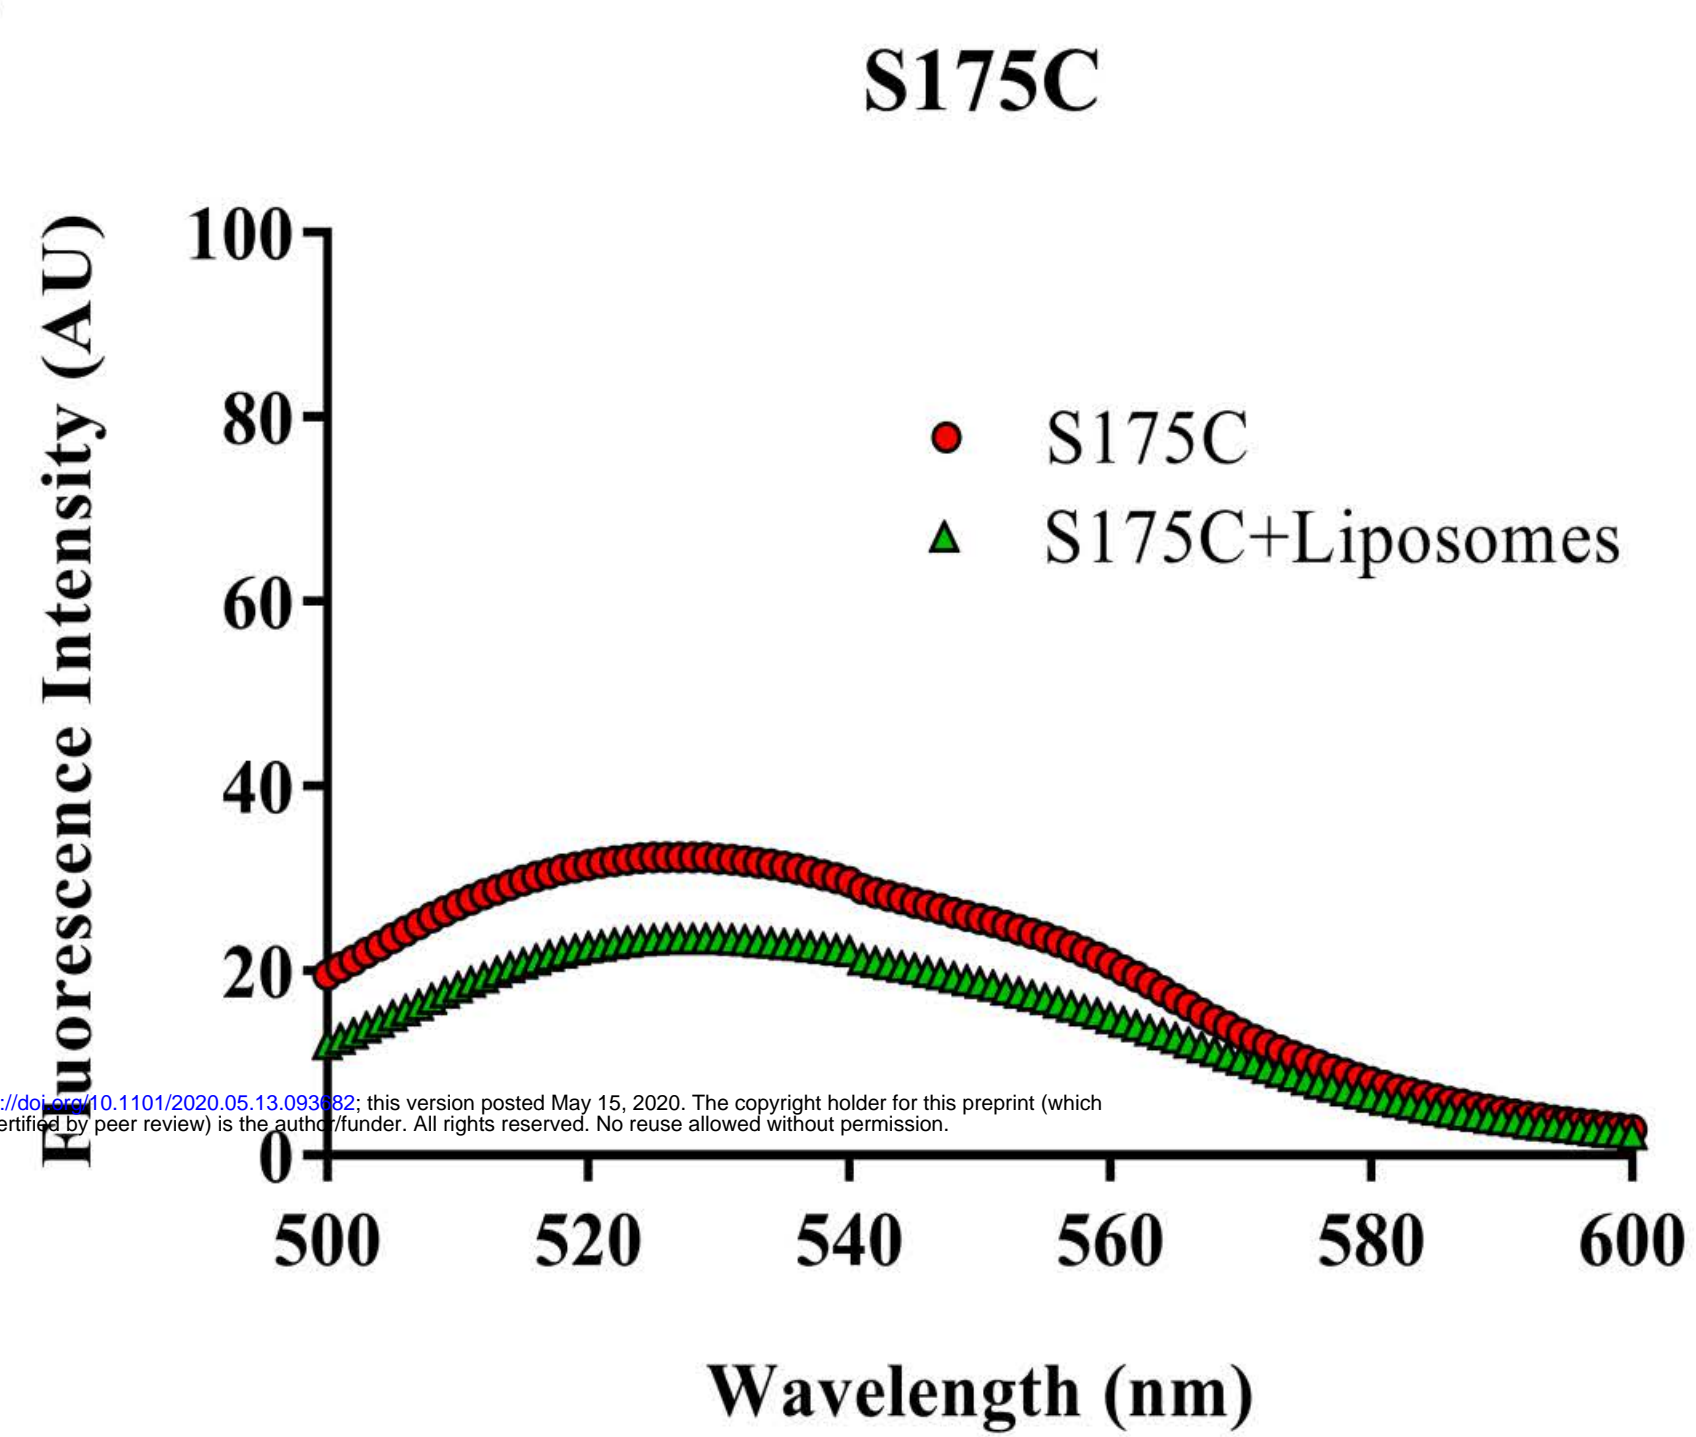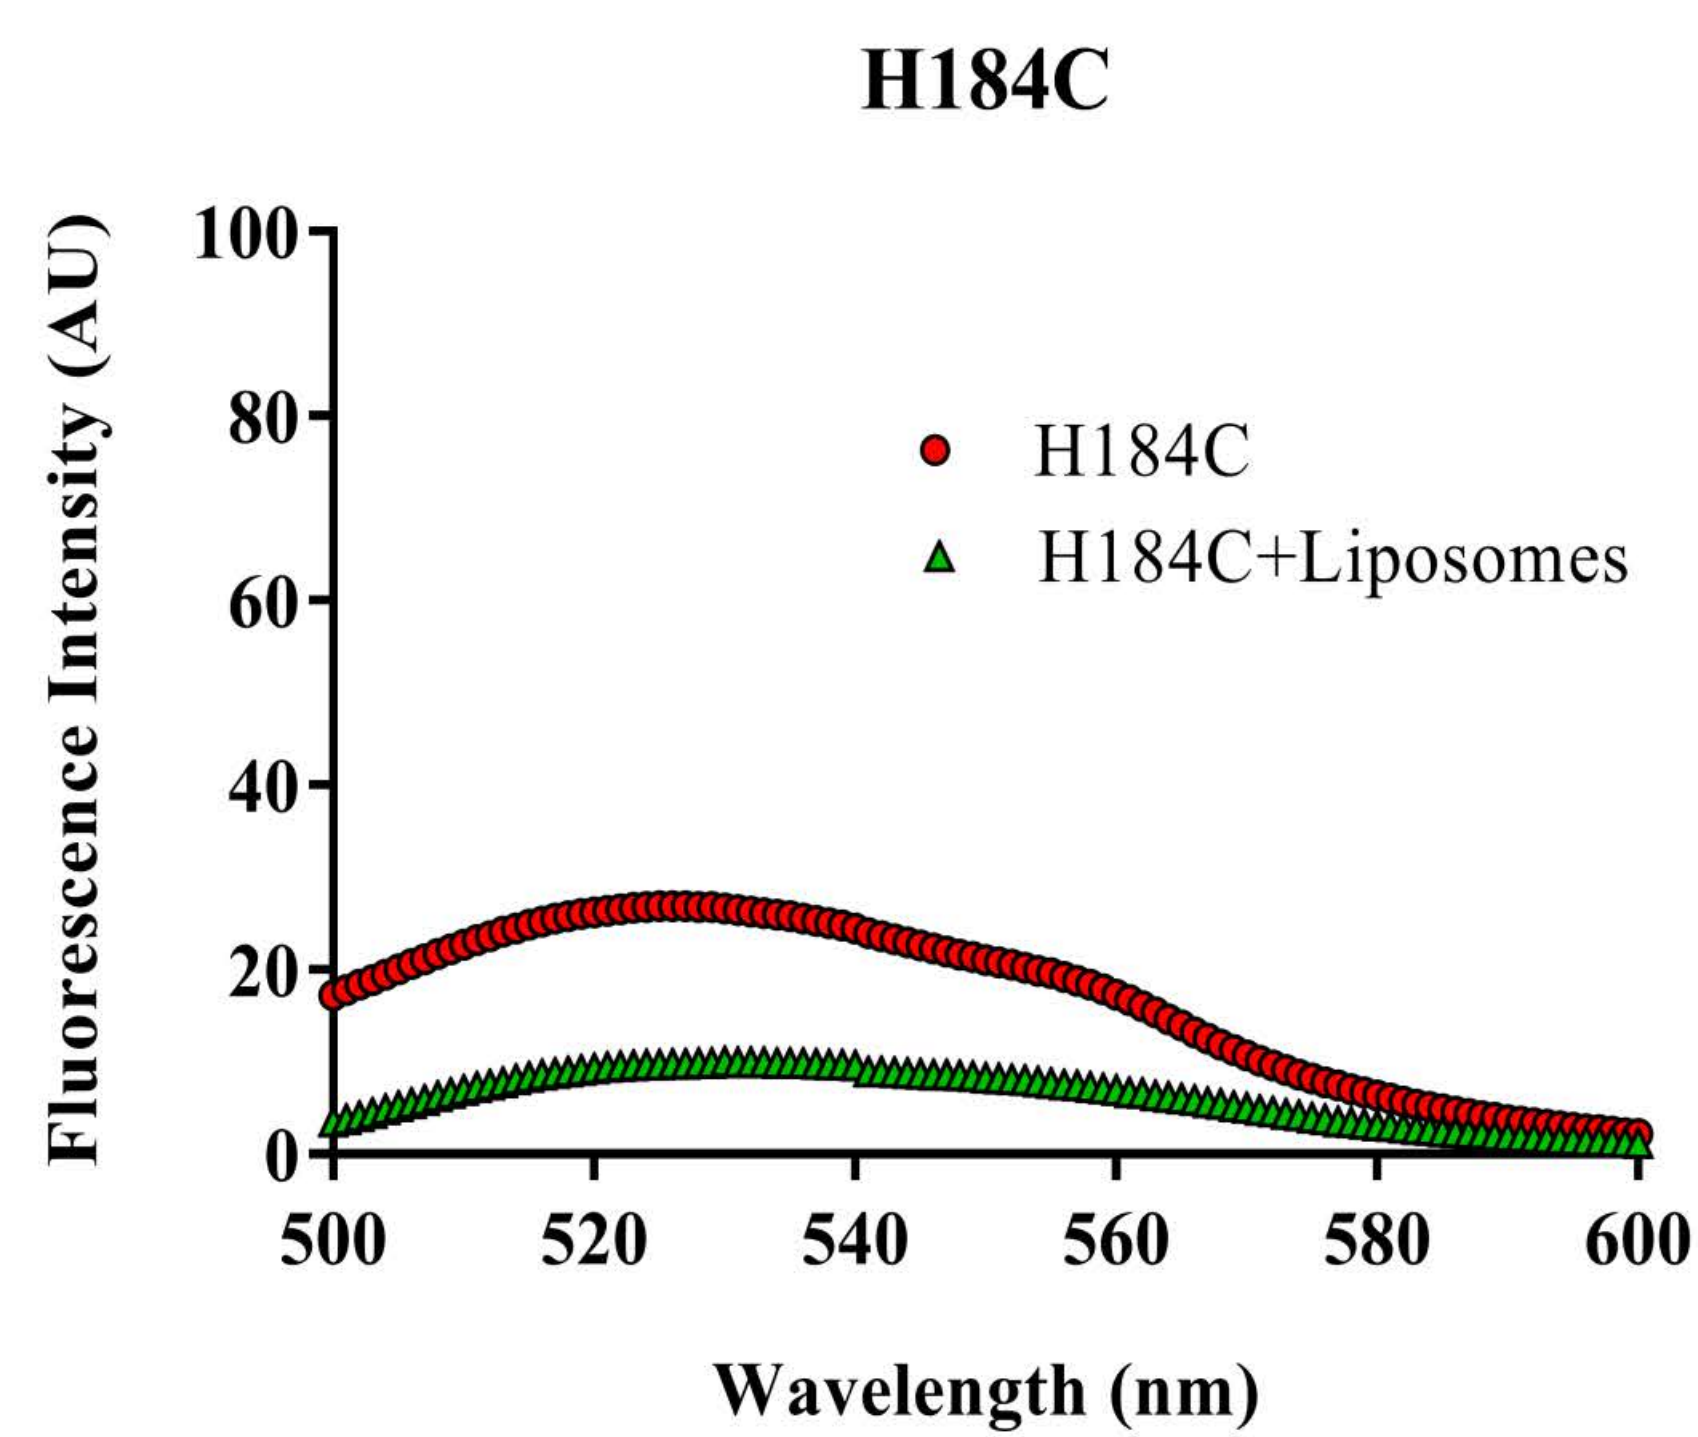**F**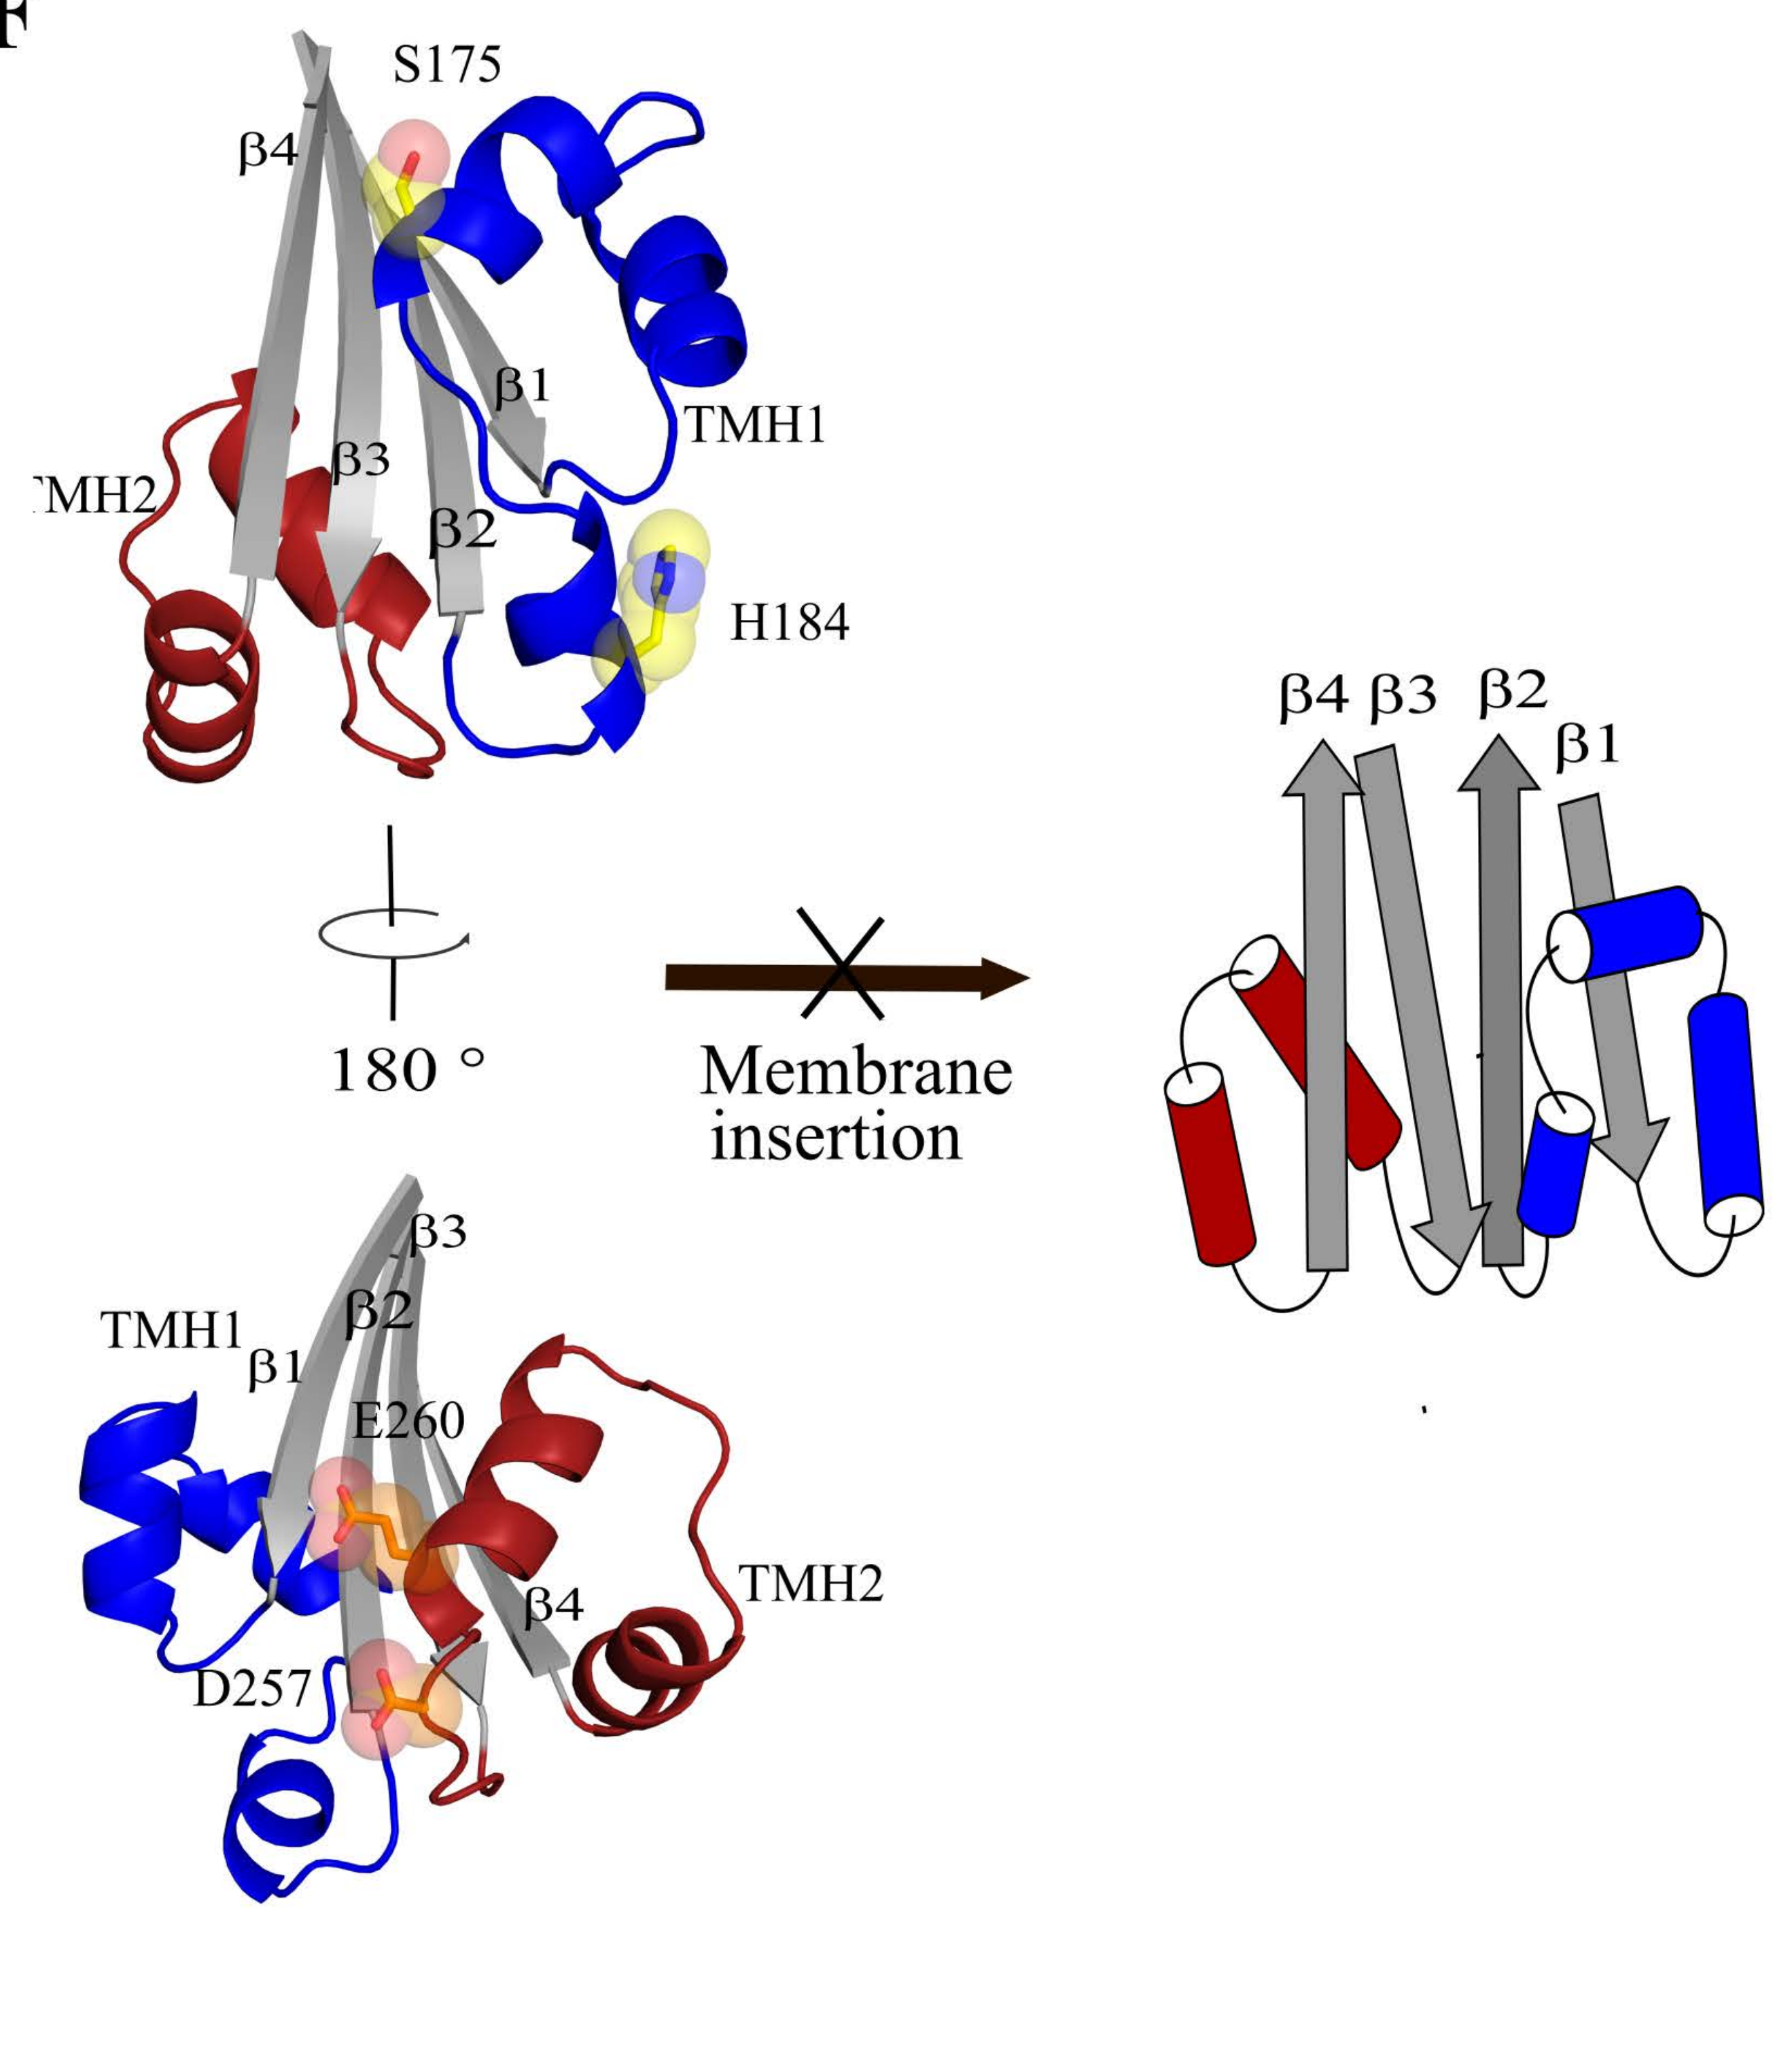**E**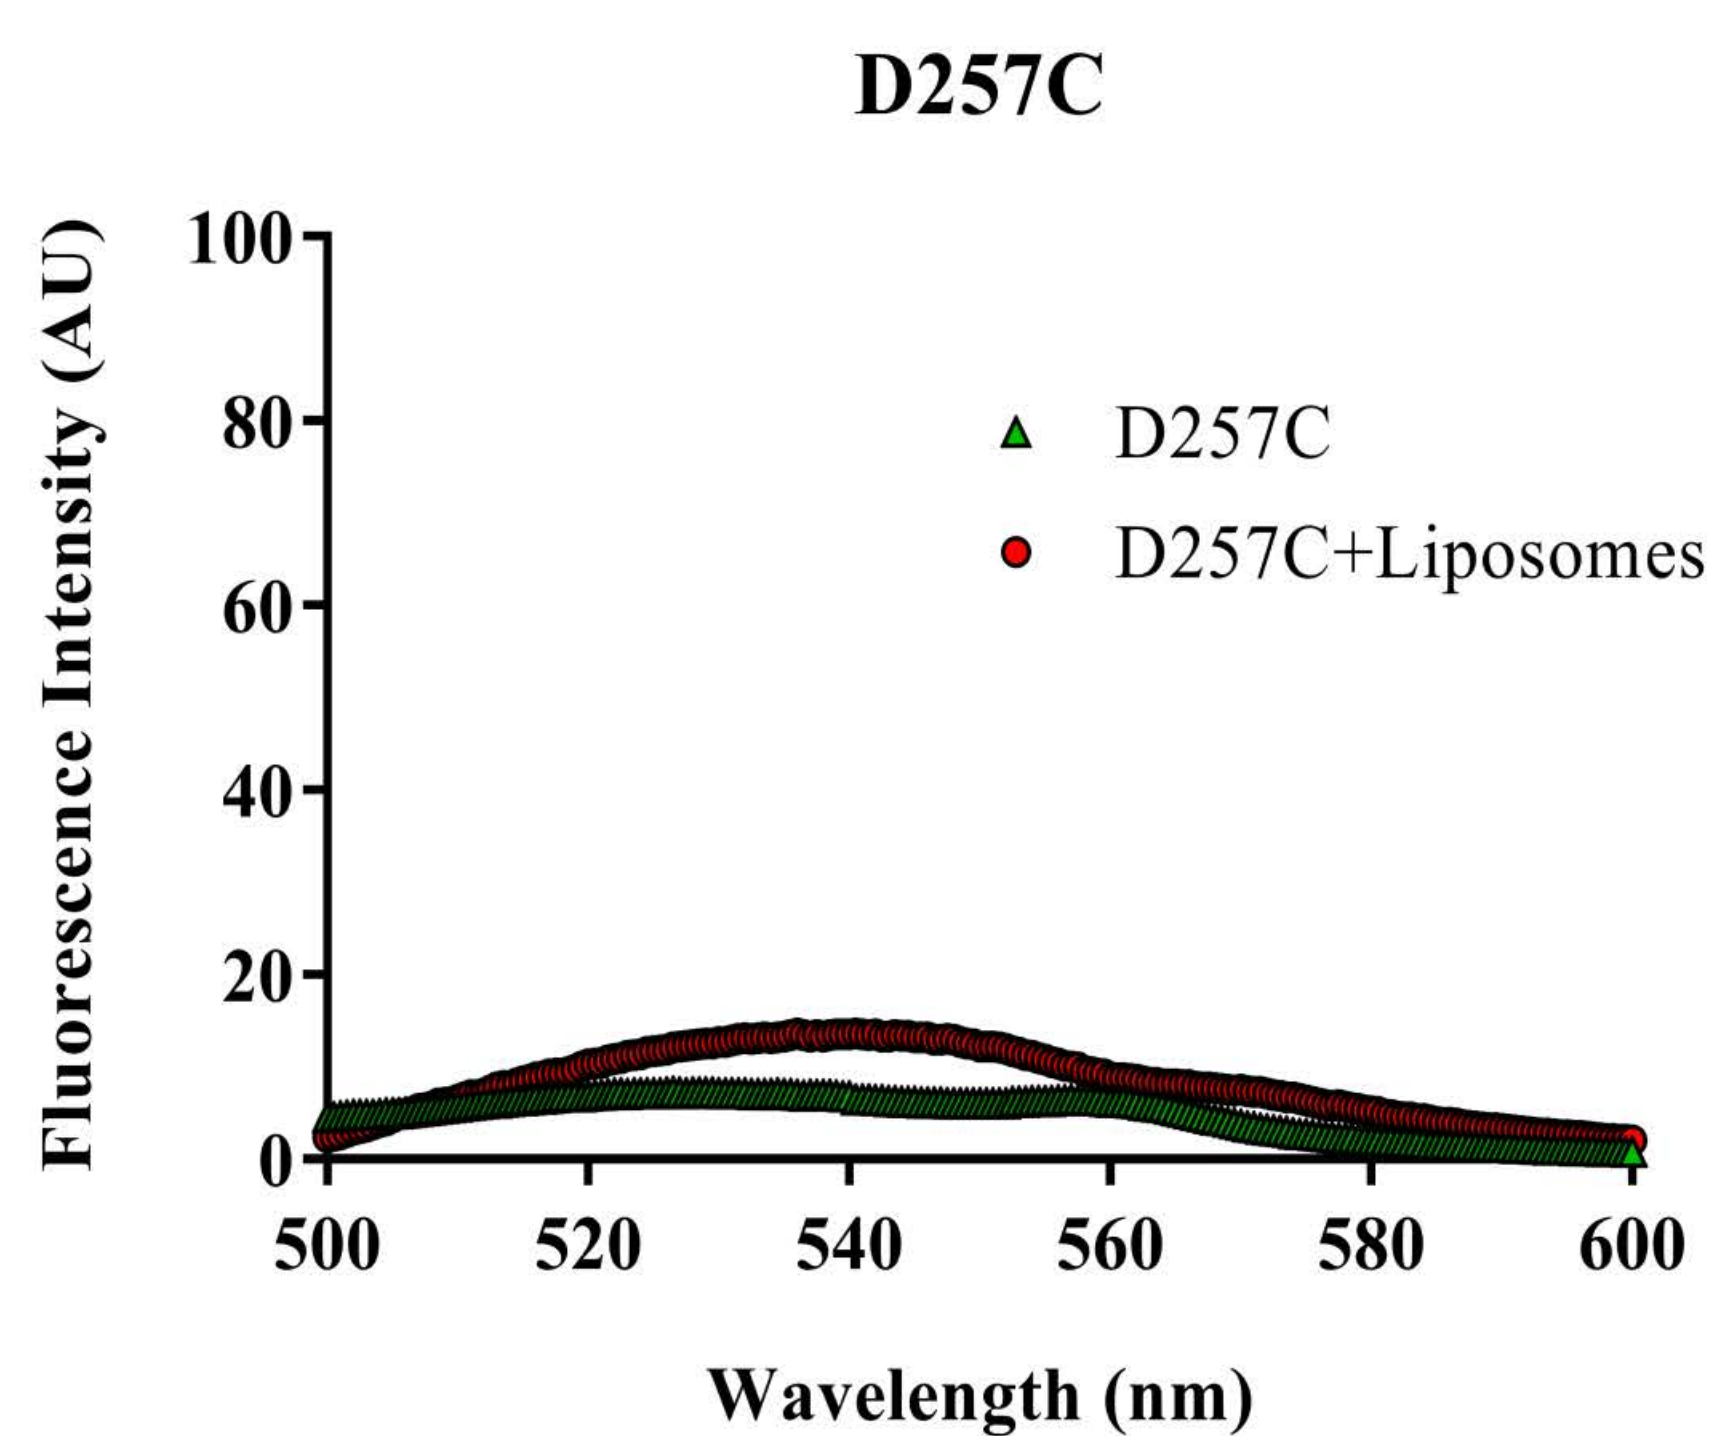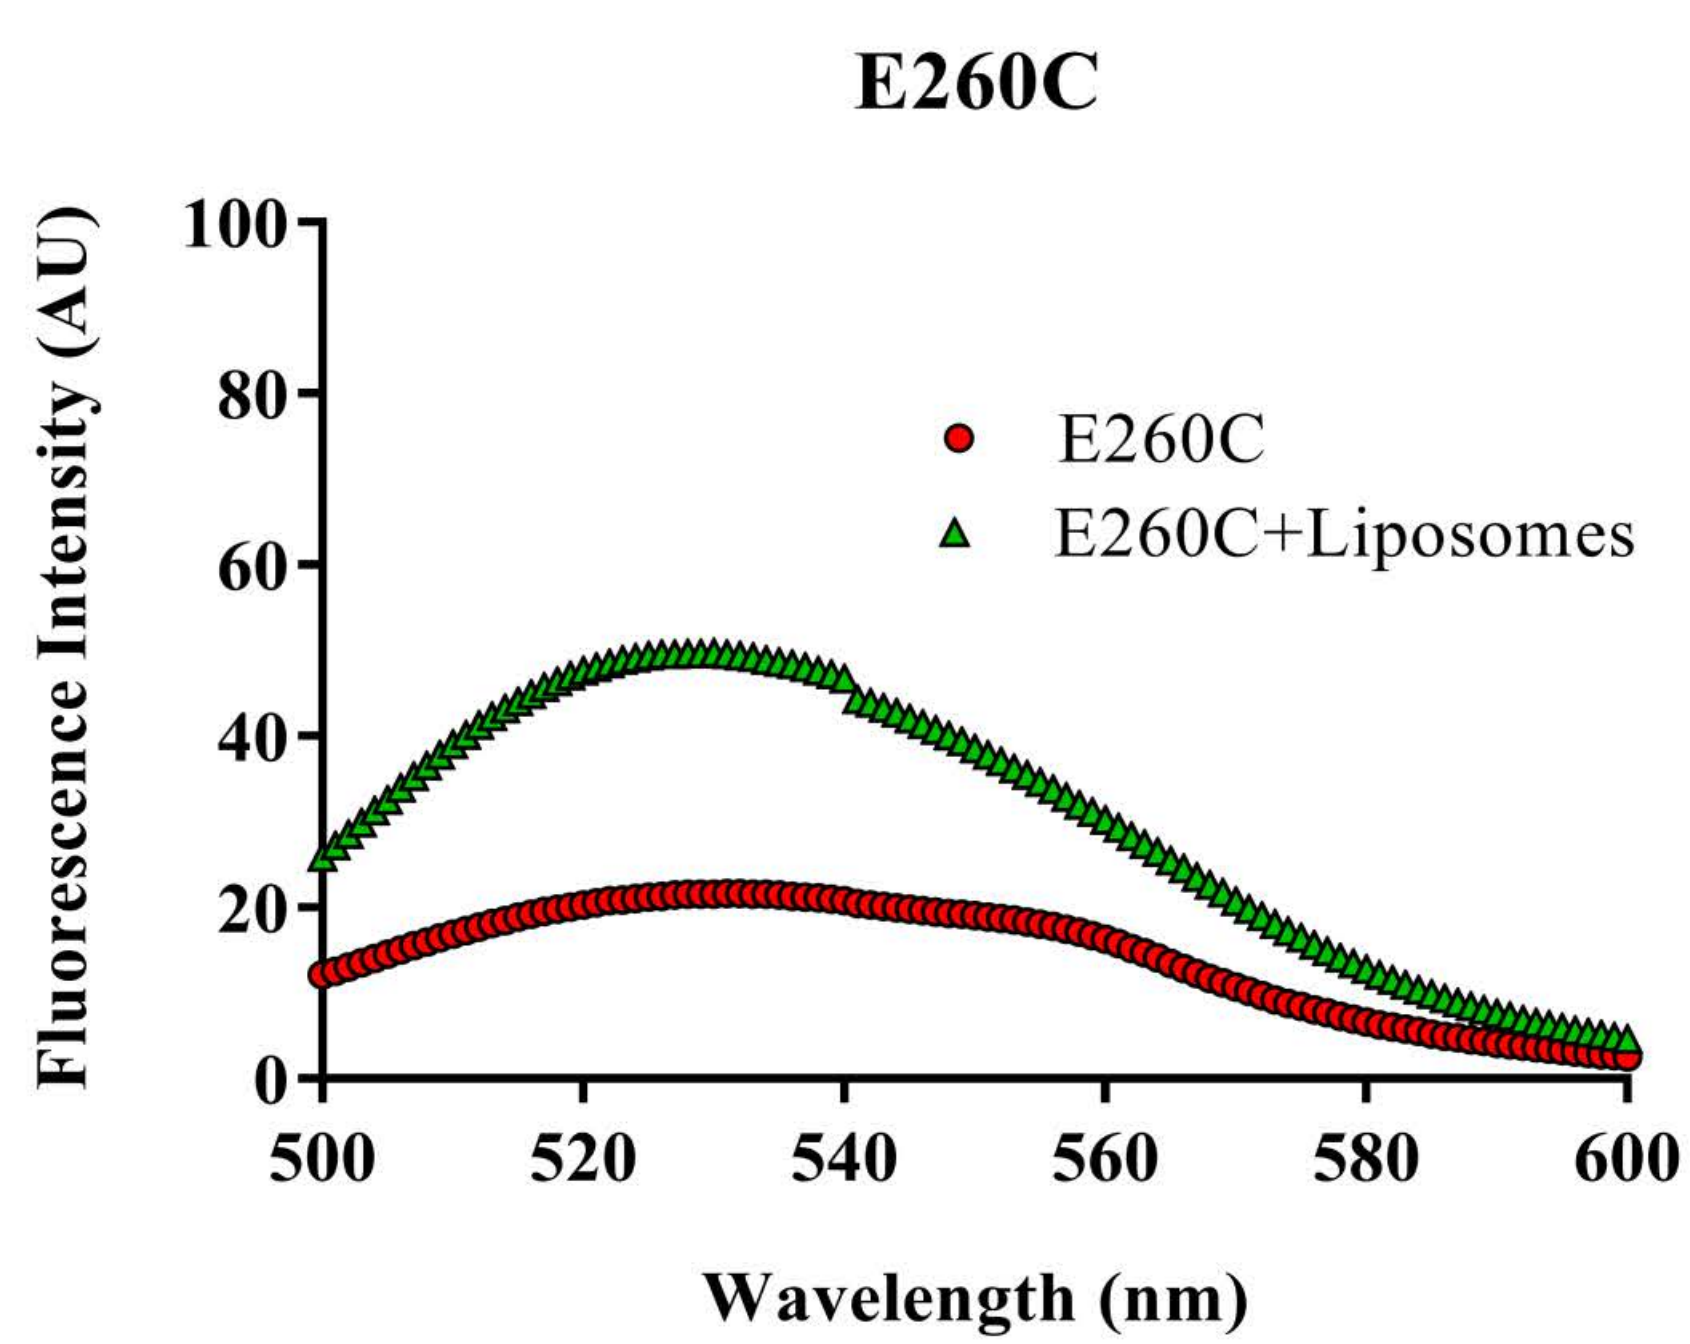

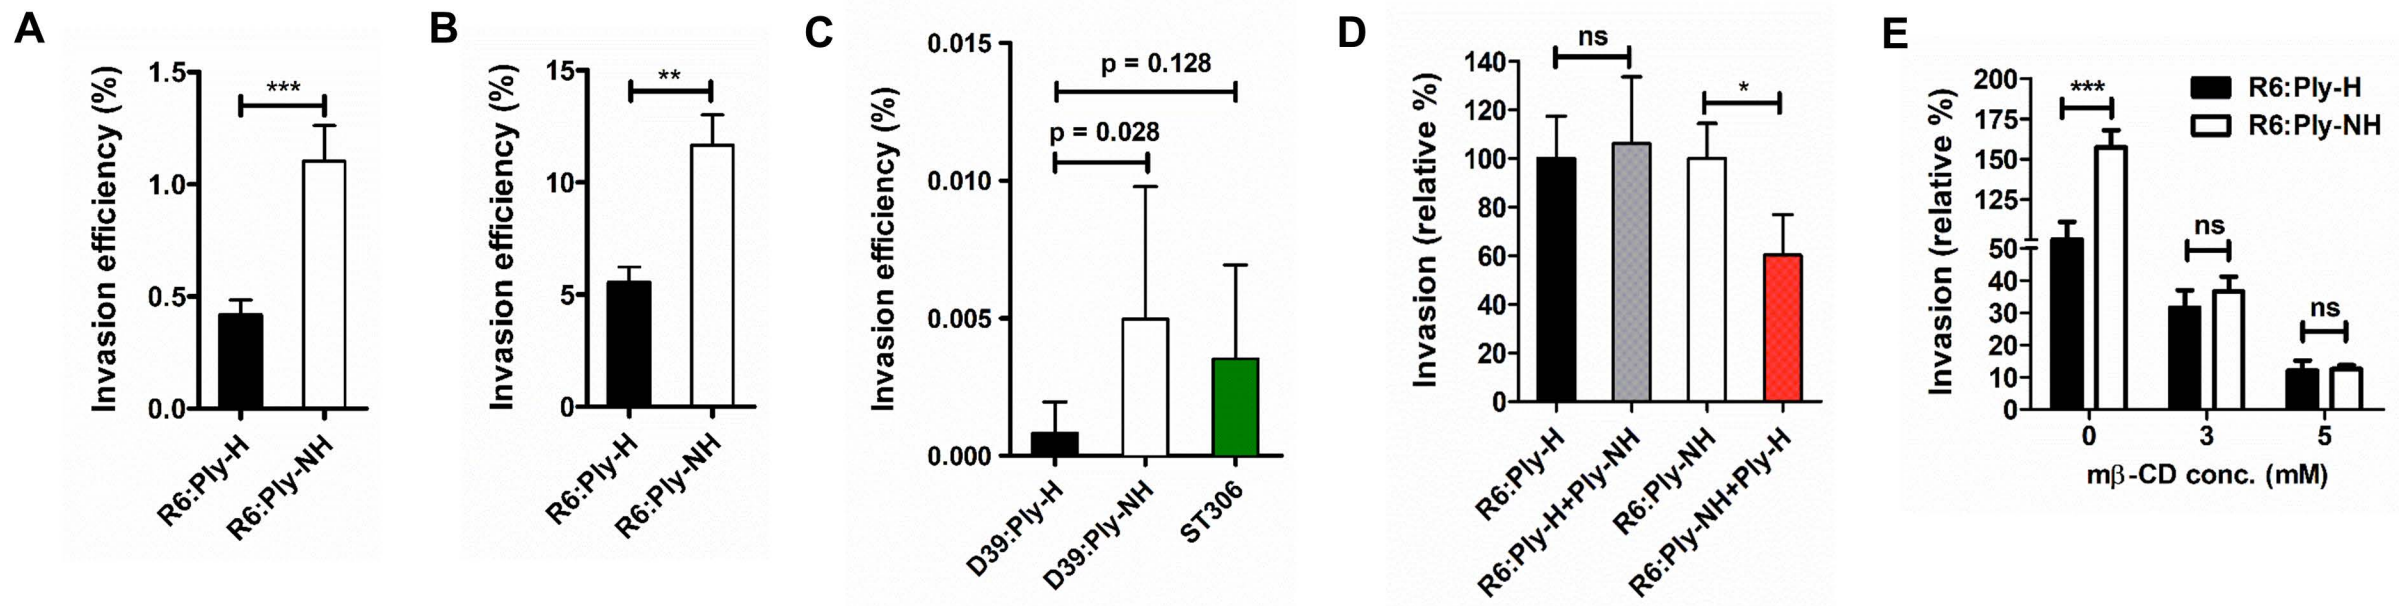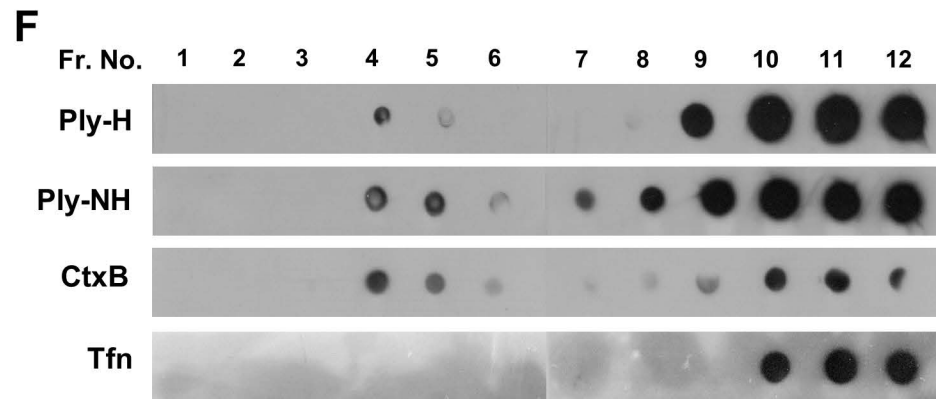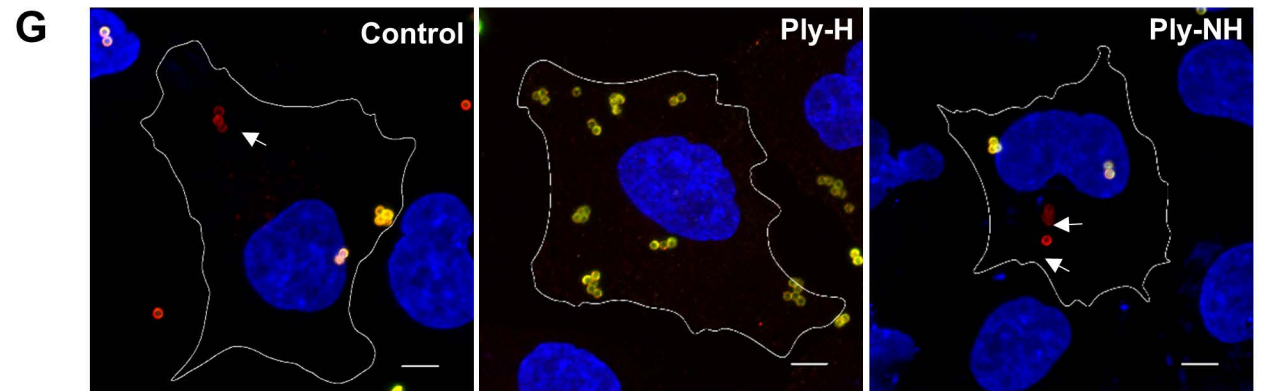

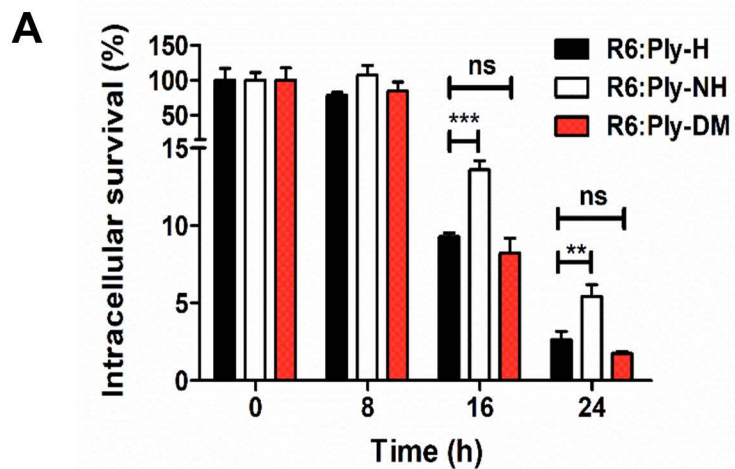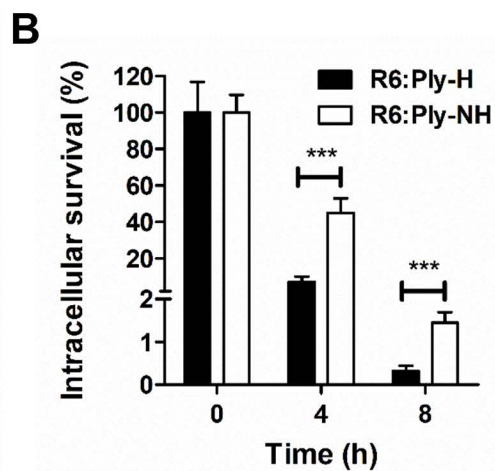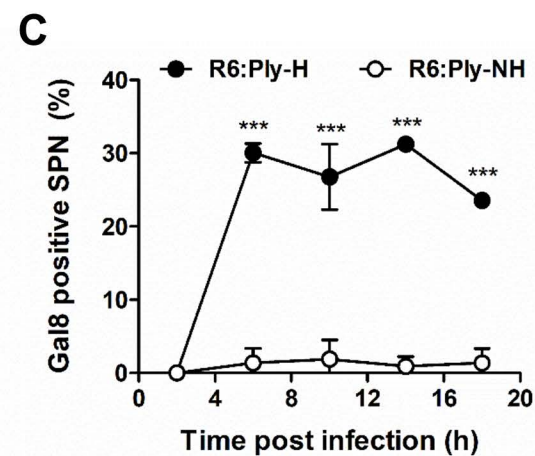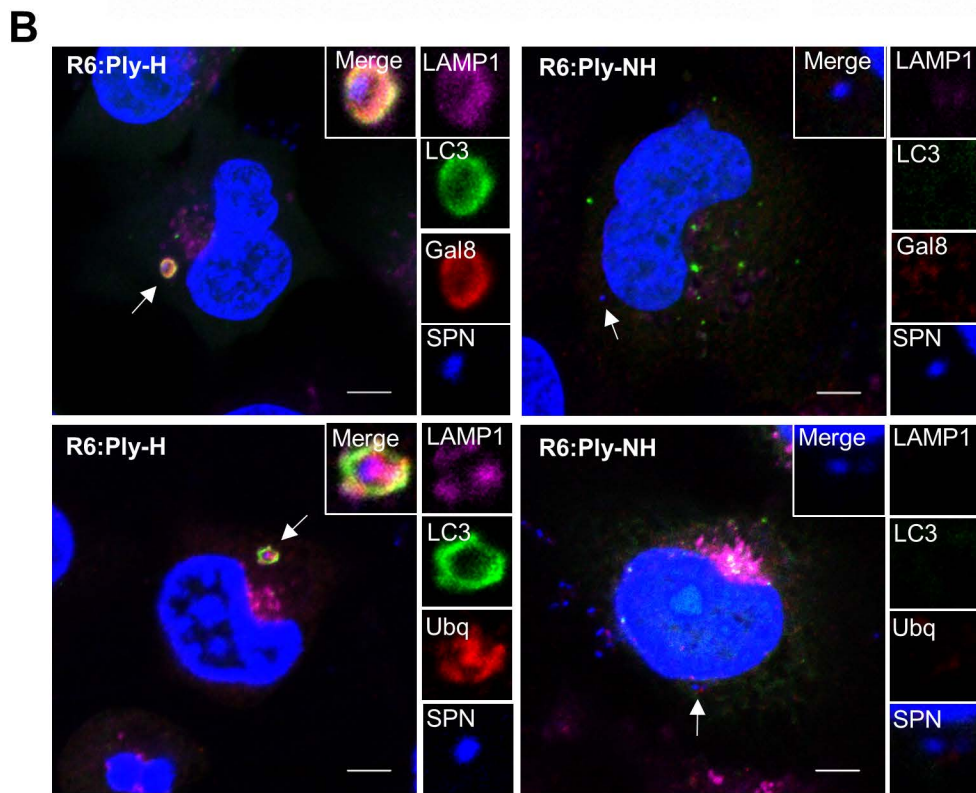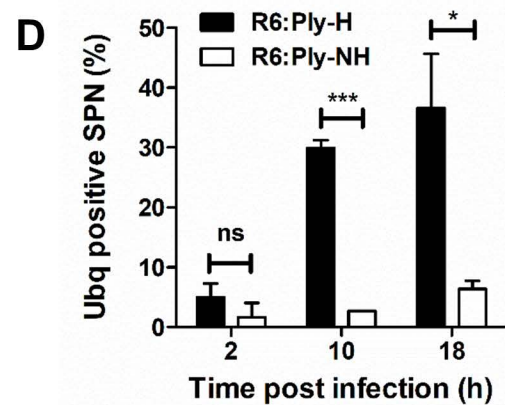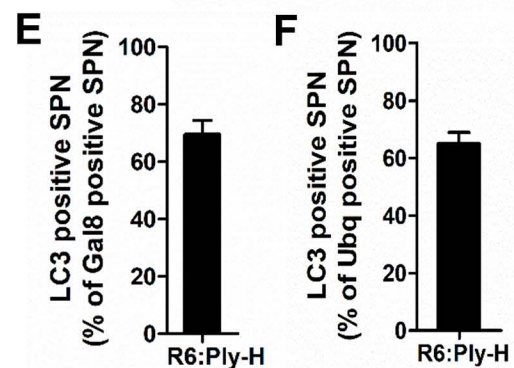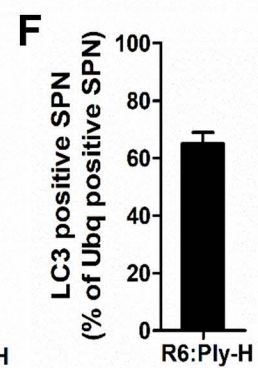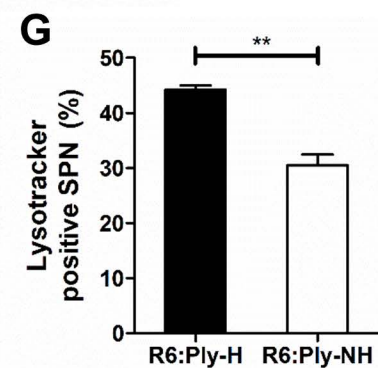

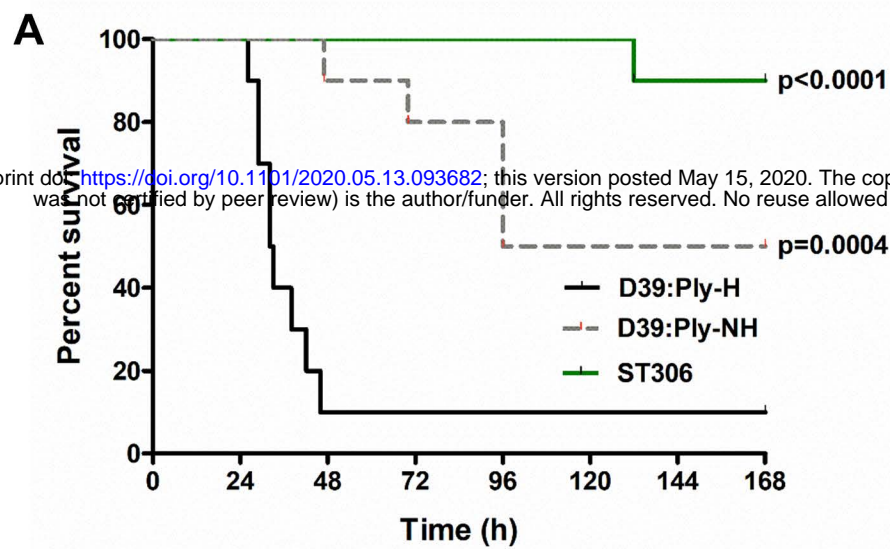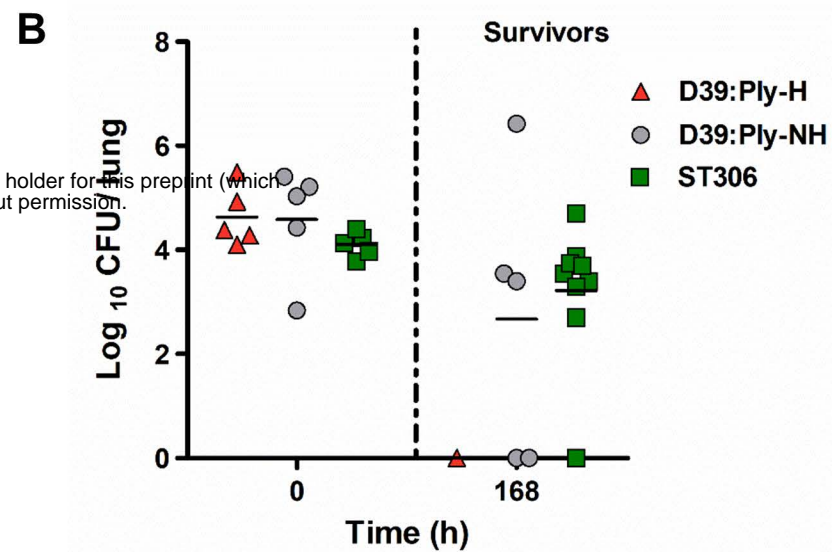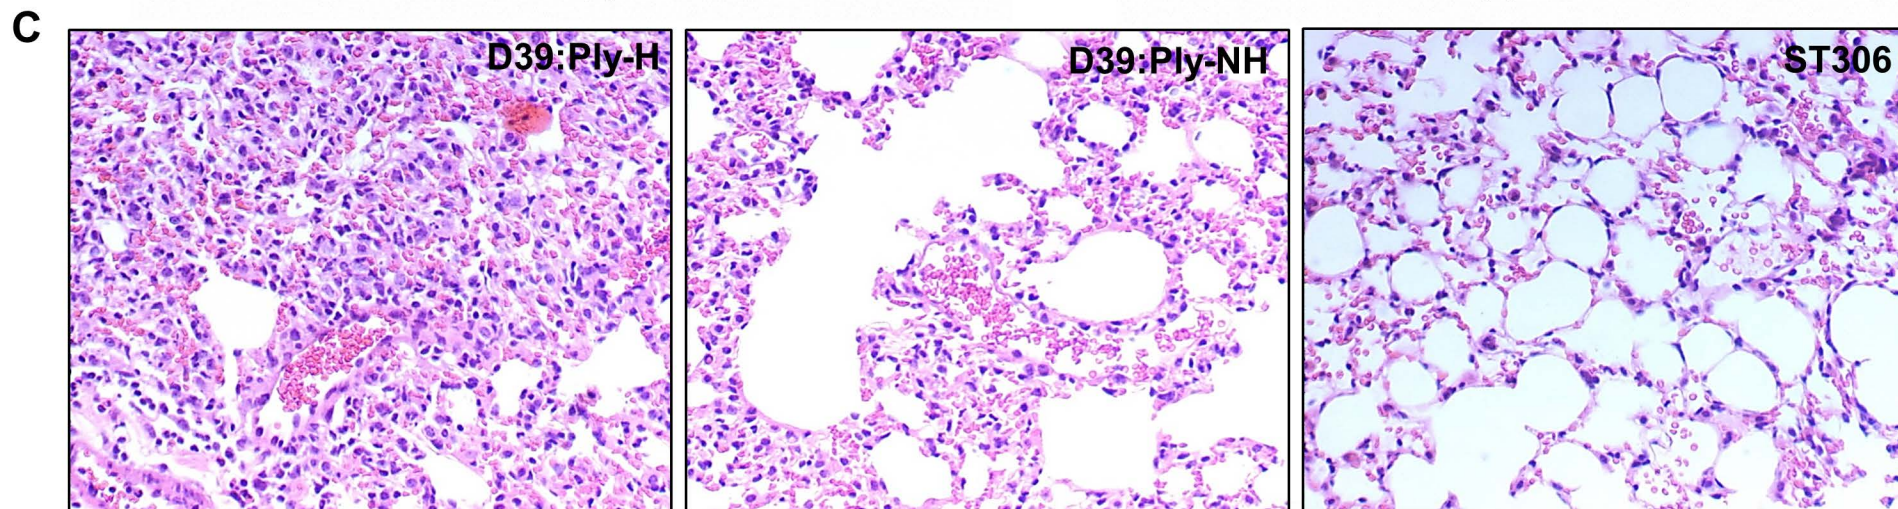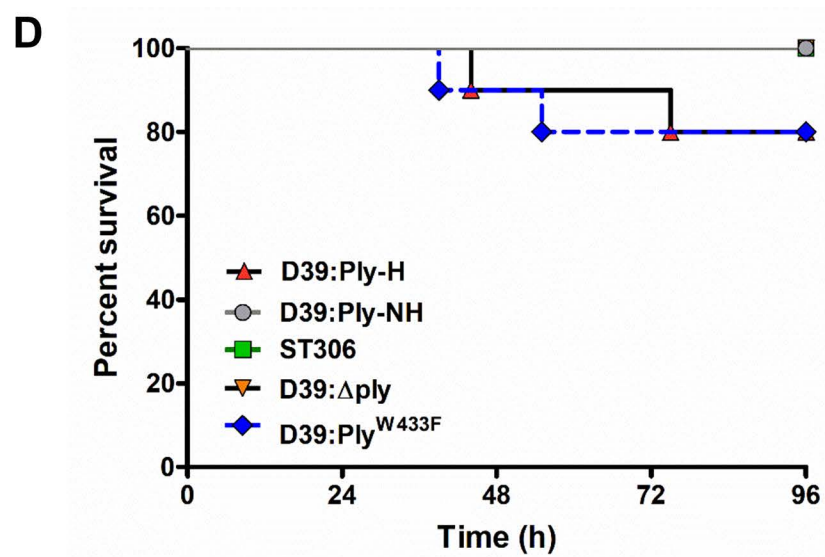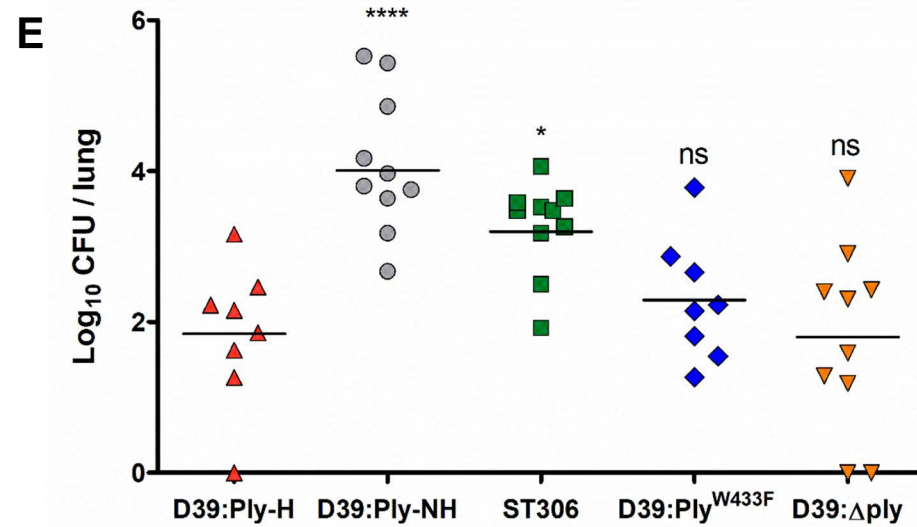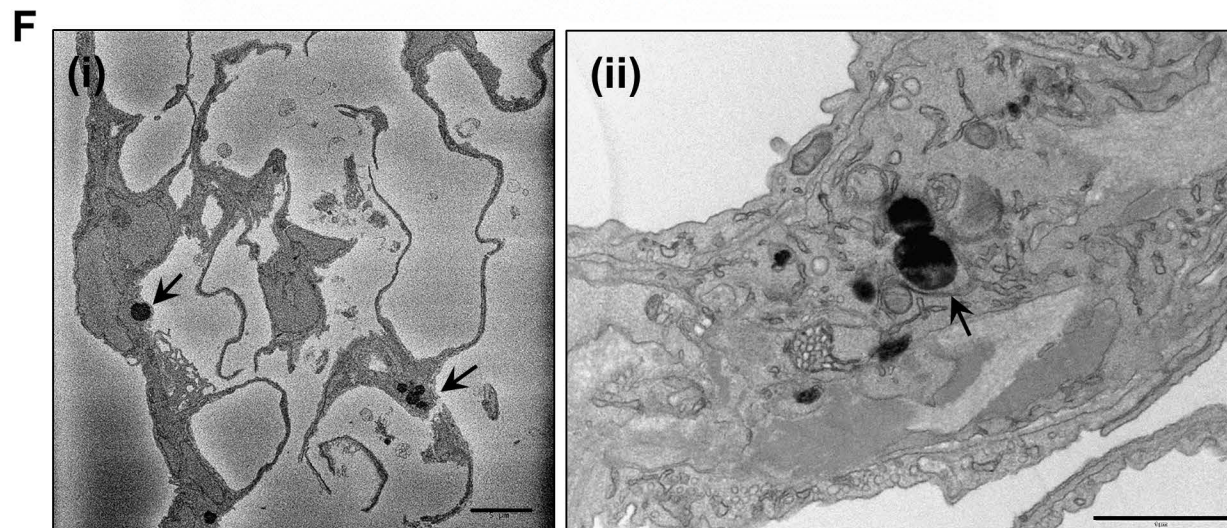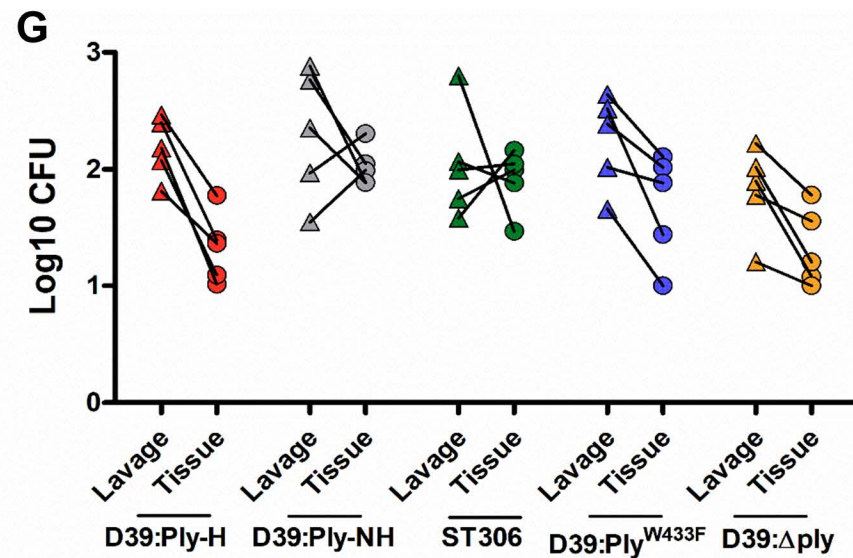

### Pore-forming toxin (Ply-H)

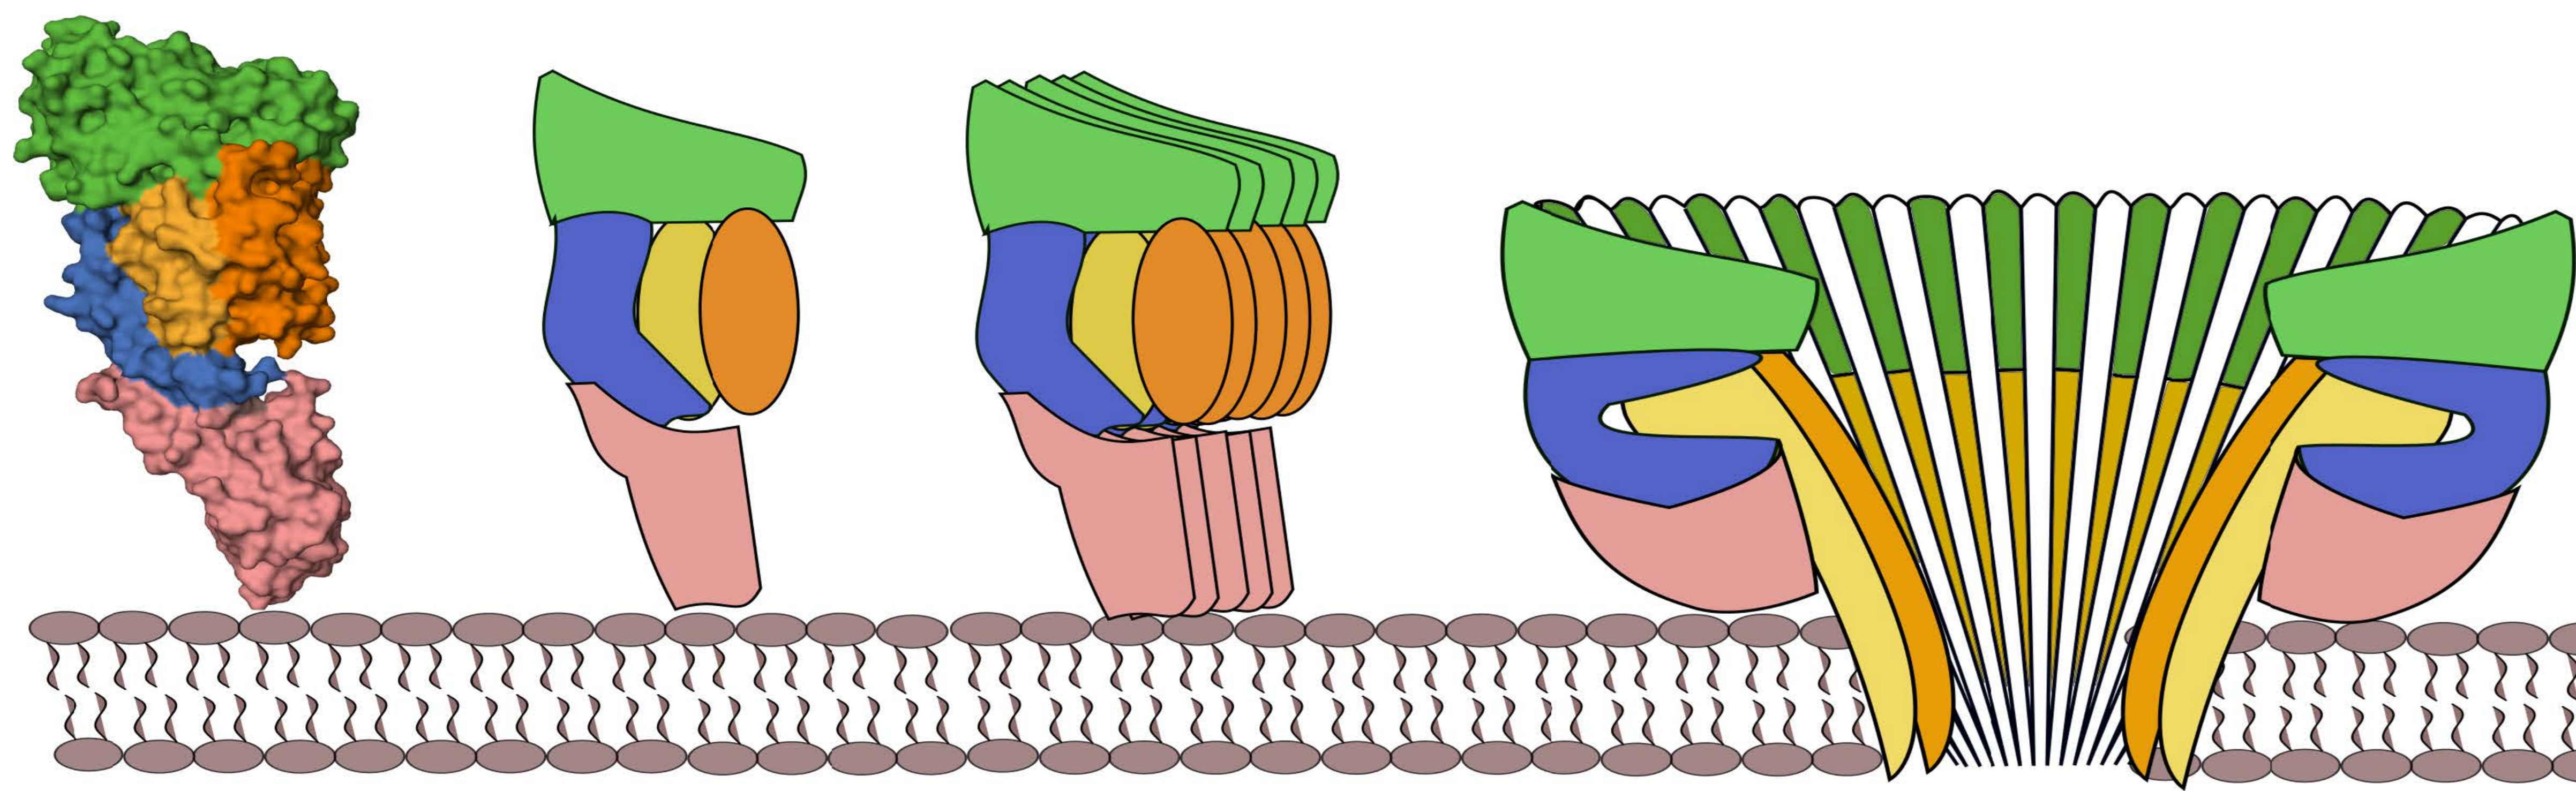

Soluble monomer of Ply-H

Prepore oligomers

Ply-H pore

### Non Pore-forming toxin (Ply-NH)

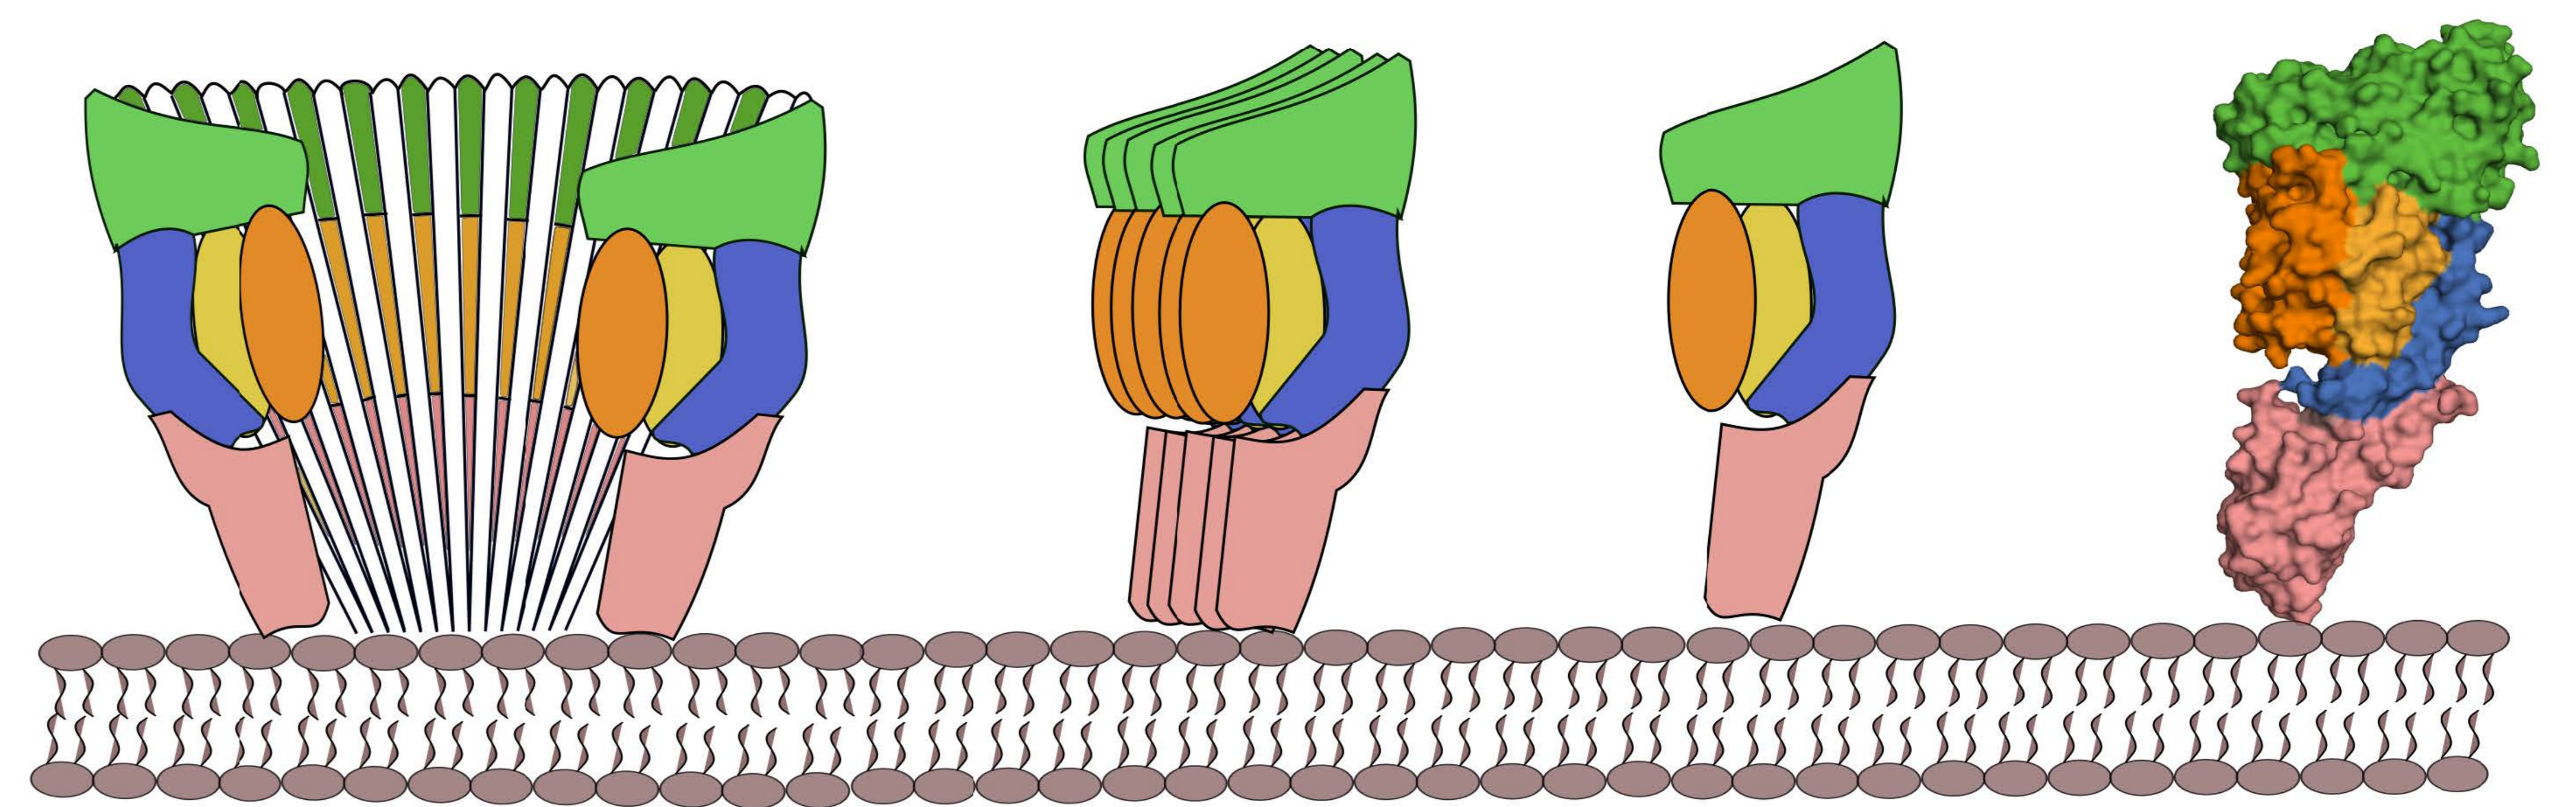

No Prepore to Pore conversion

Prepore oligomers

Soluble monomer of Ply-NH

Expulsion of damaged plasma membrane

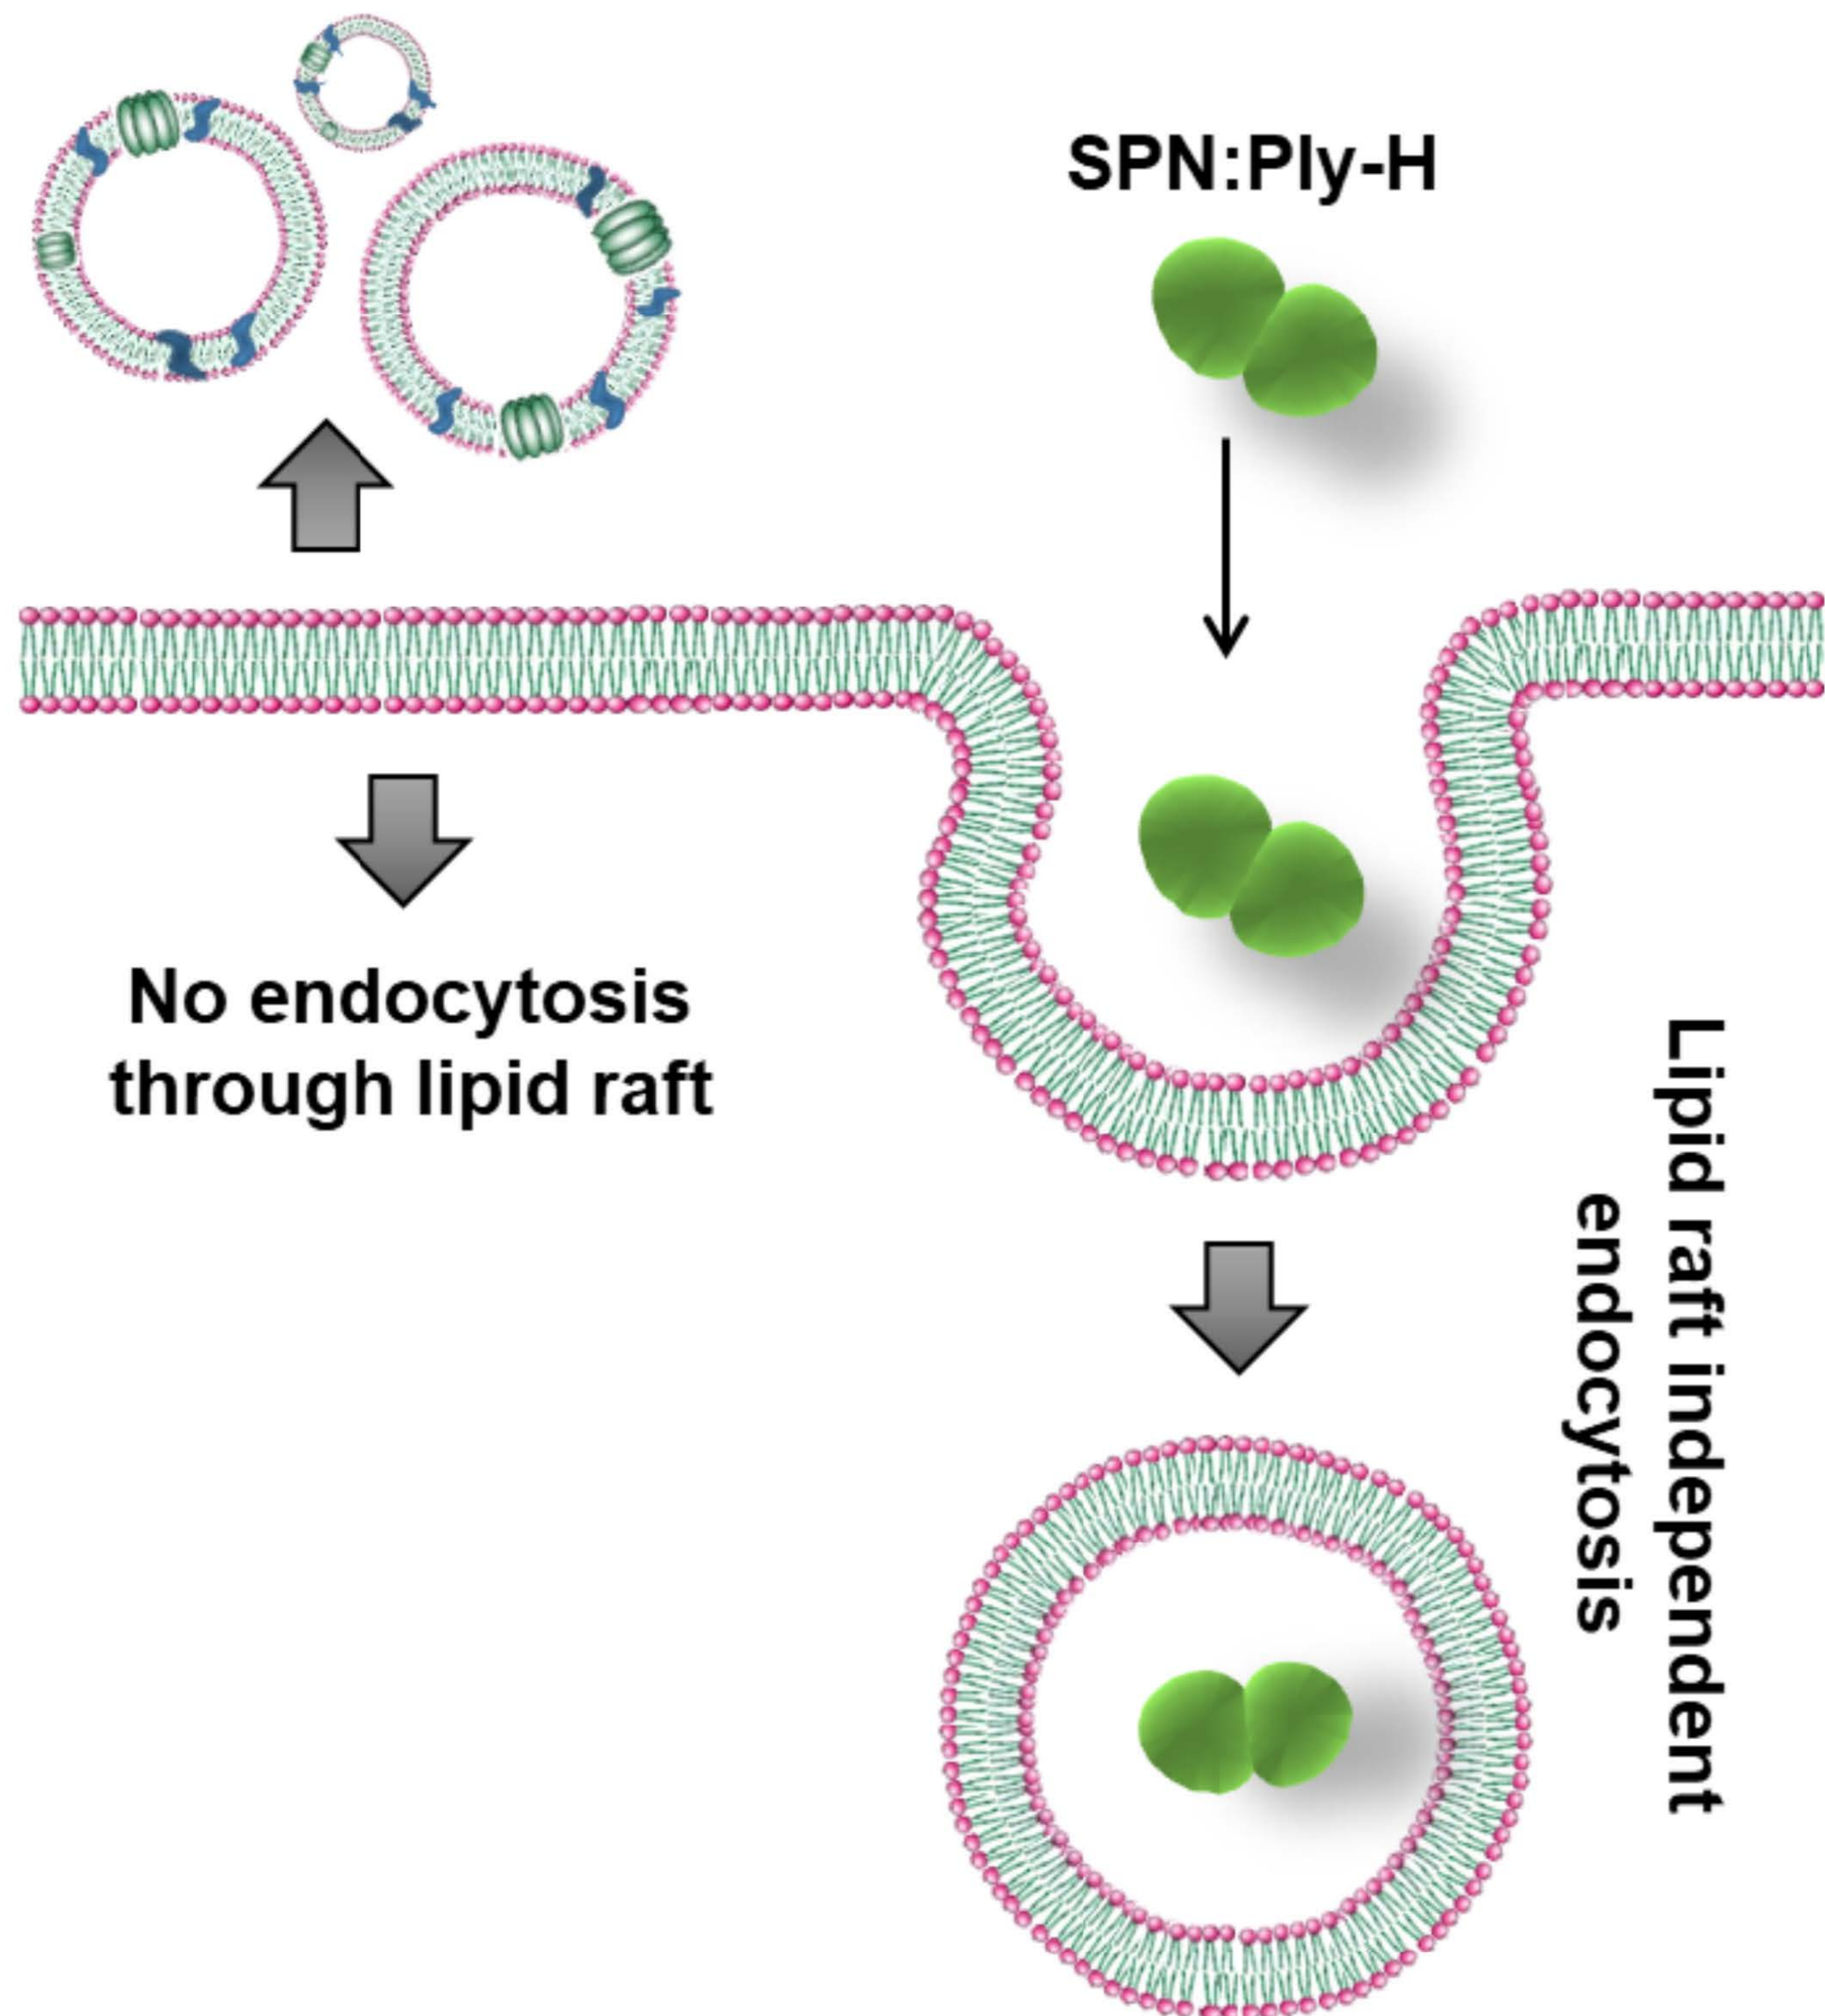

No endocytosis through lipid raft

Lipid raft independent endocytosis

Diminished cellular invasion

SPN:Ply-NH

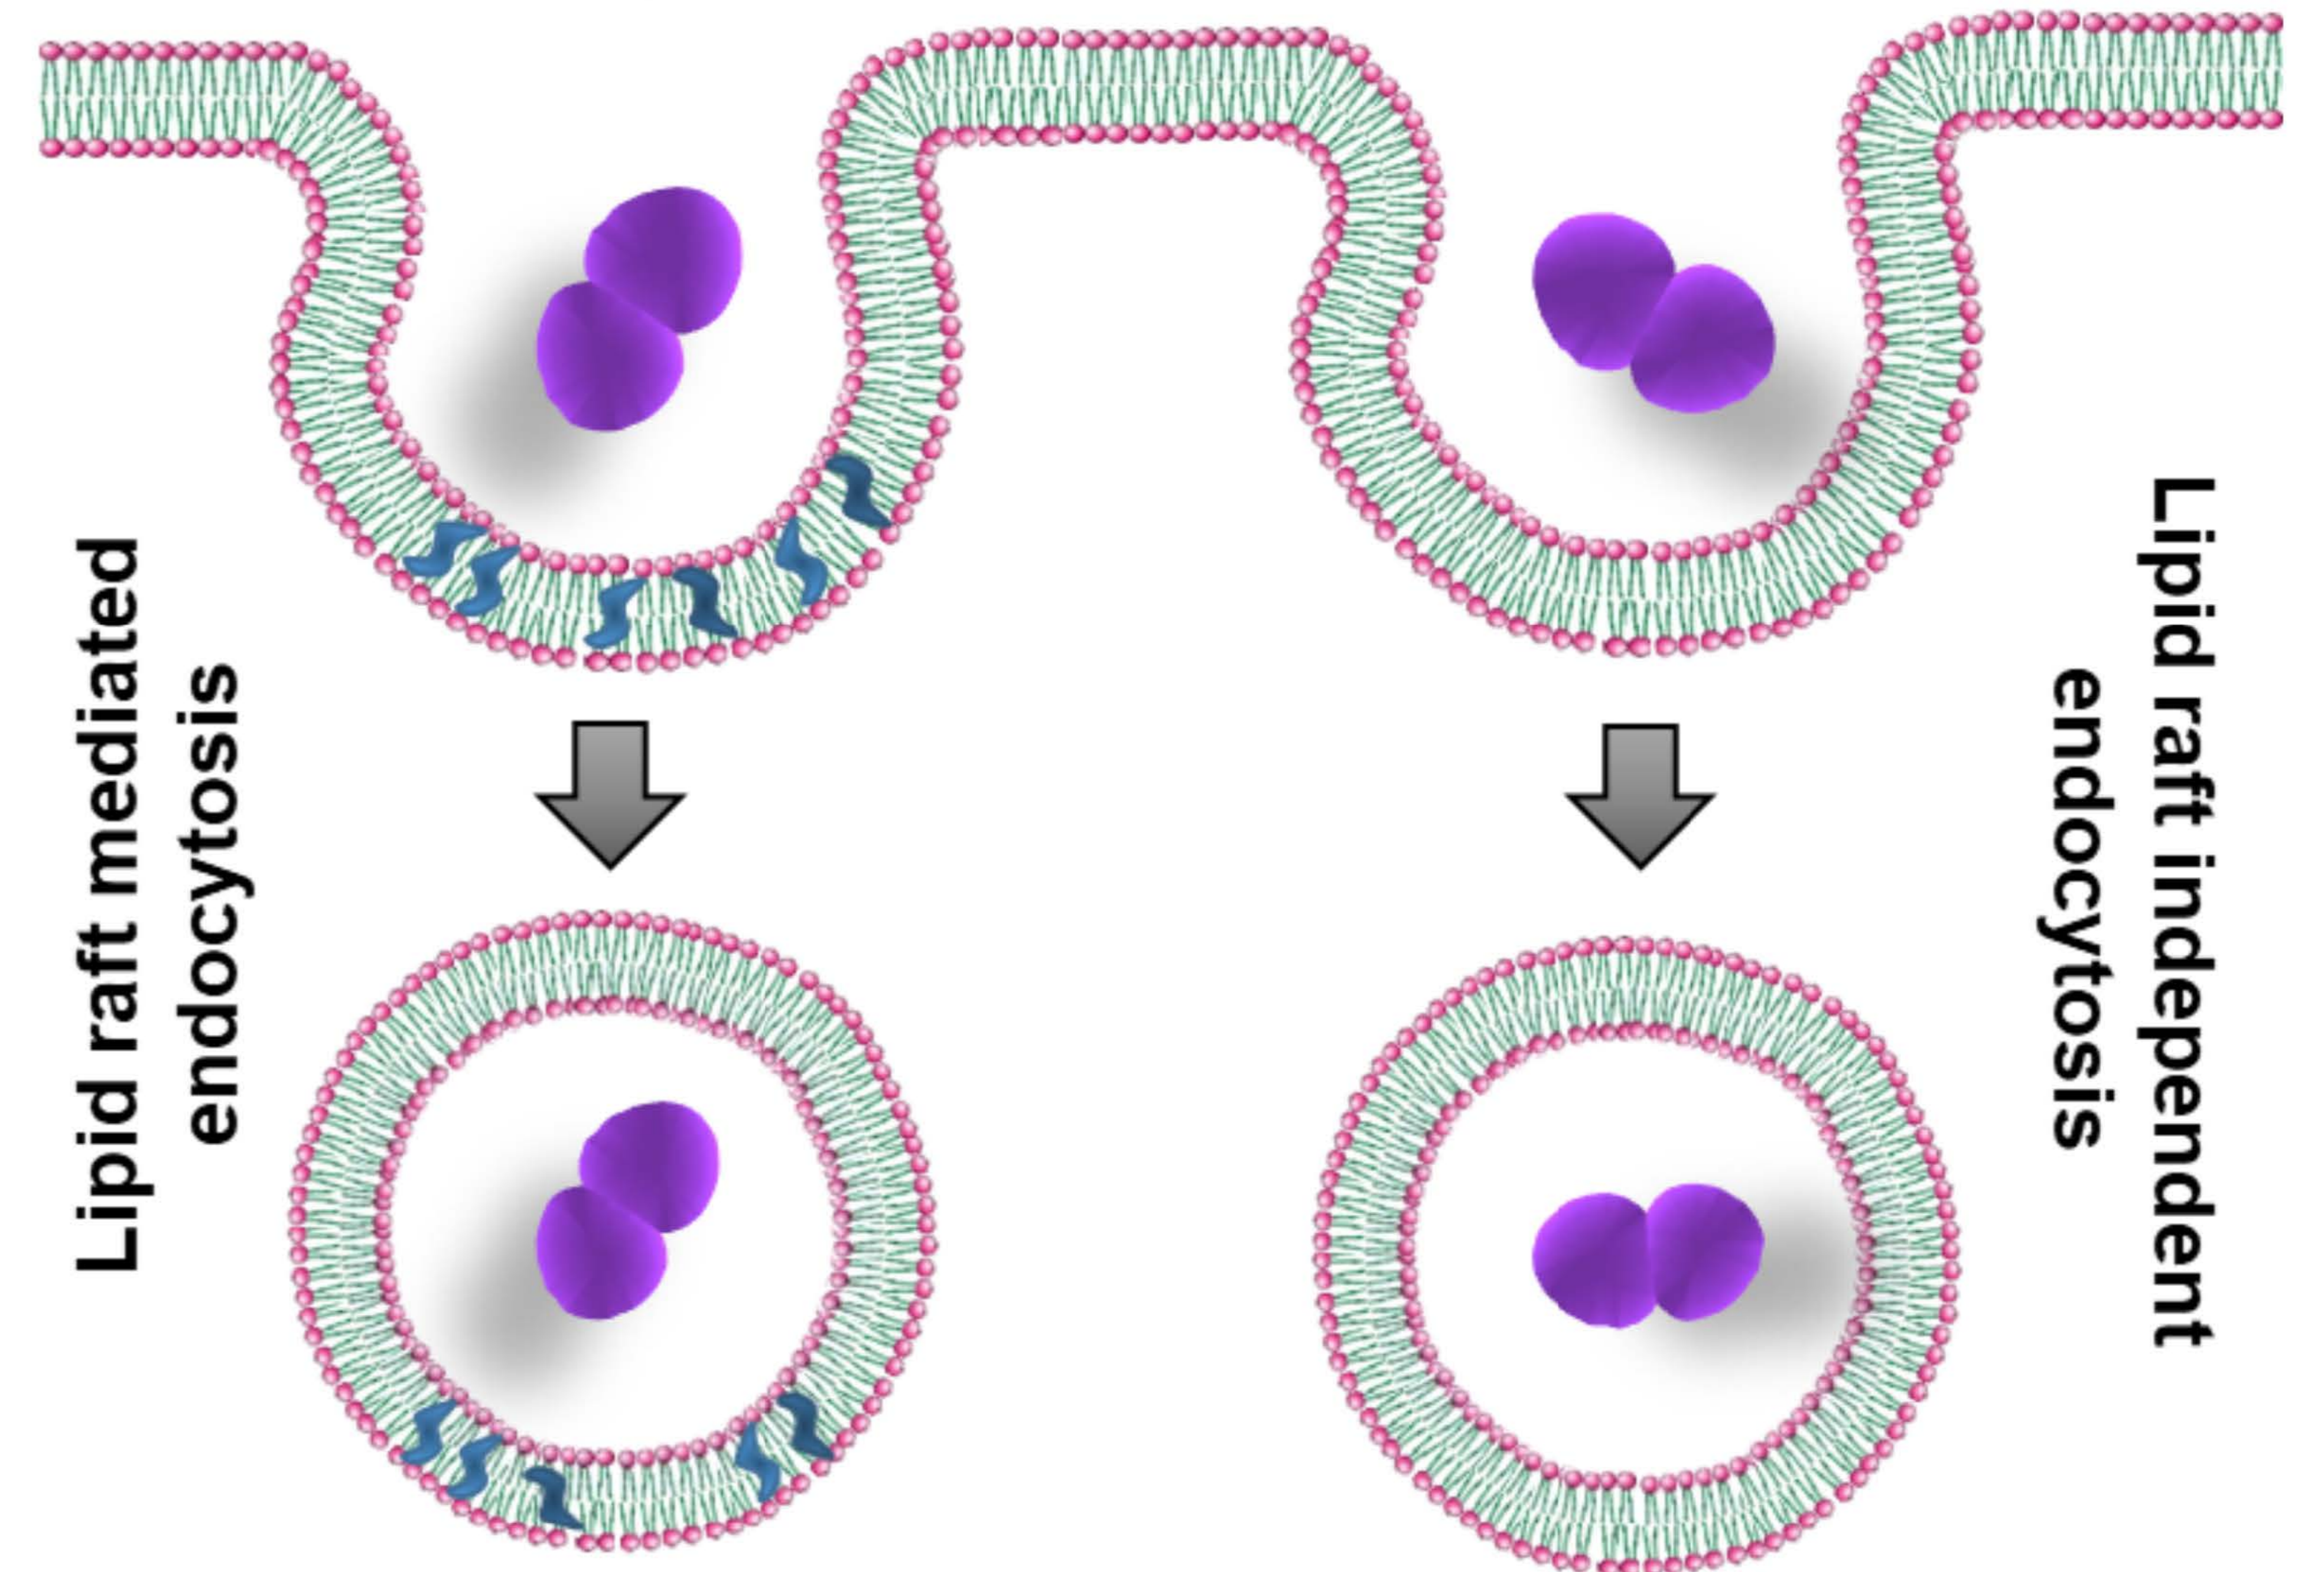

Lipid raft mediated endocytosis

Lipid raft independent endocytosis

Improved penetration

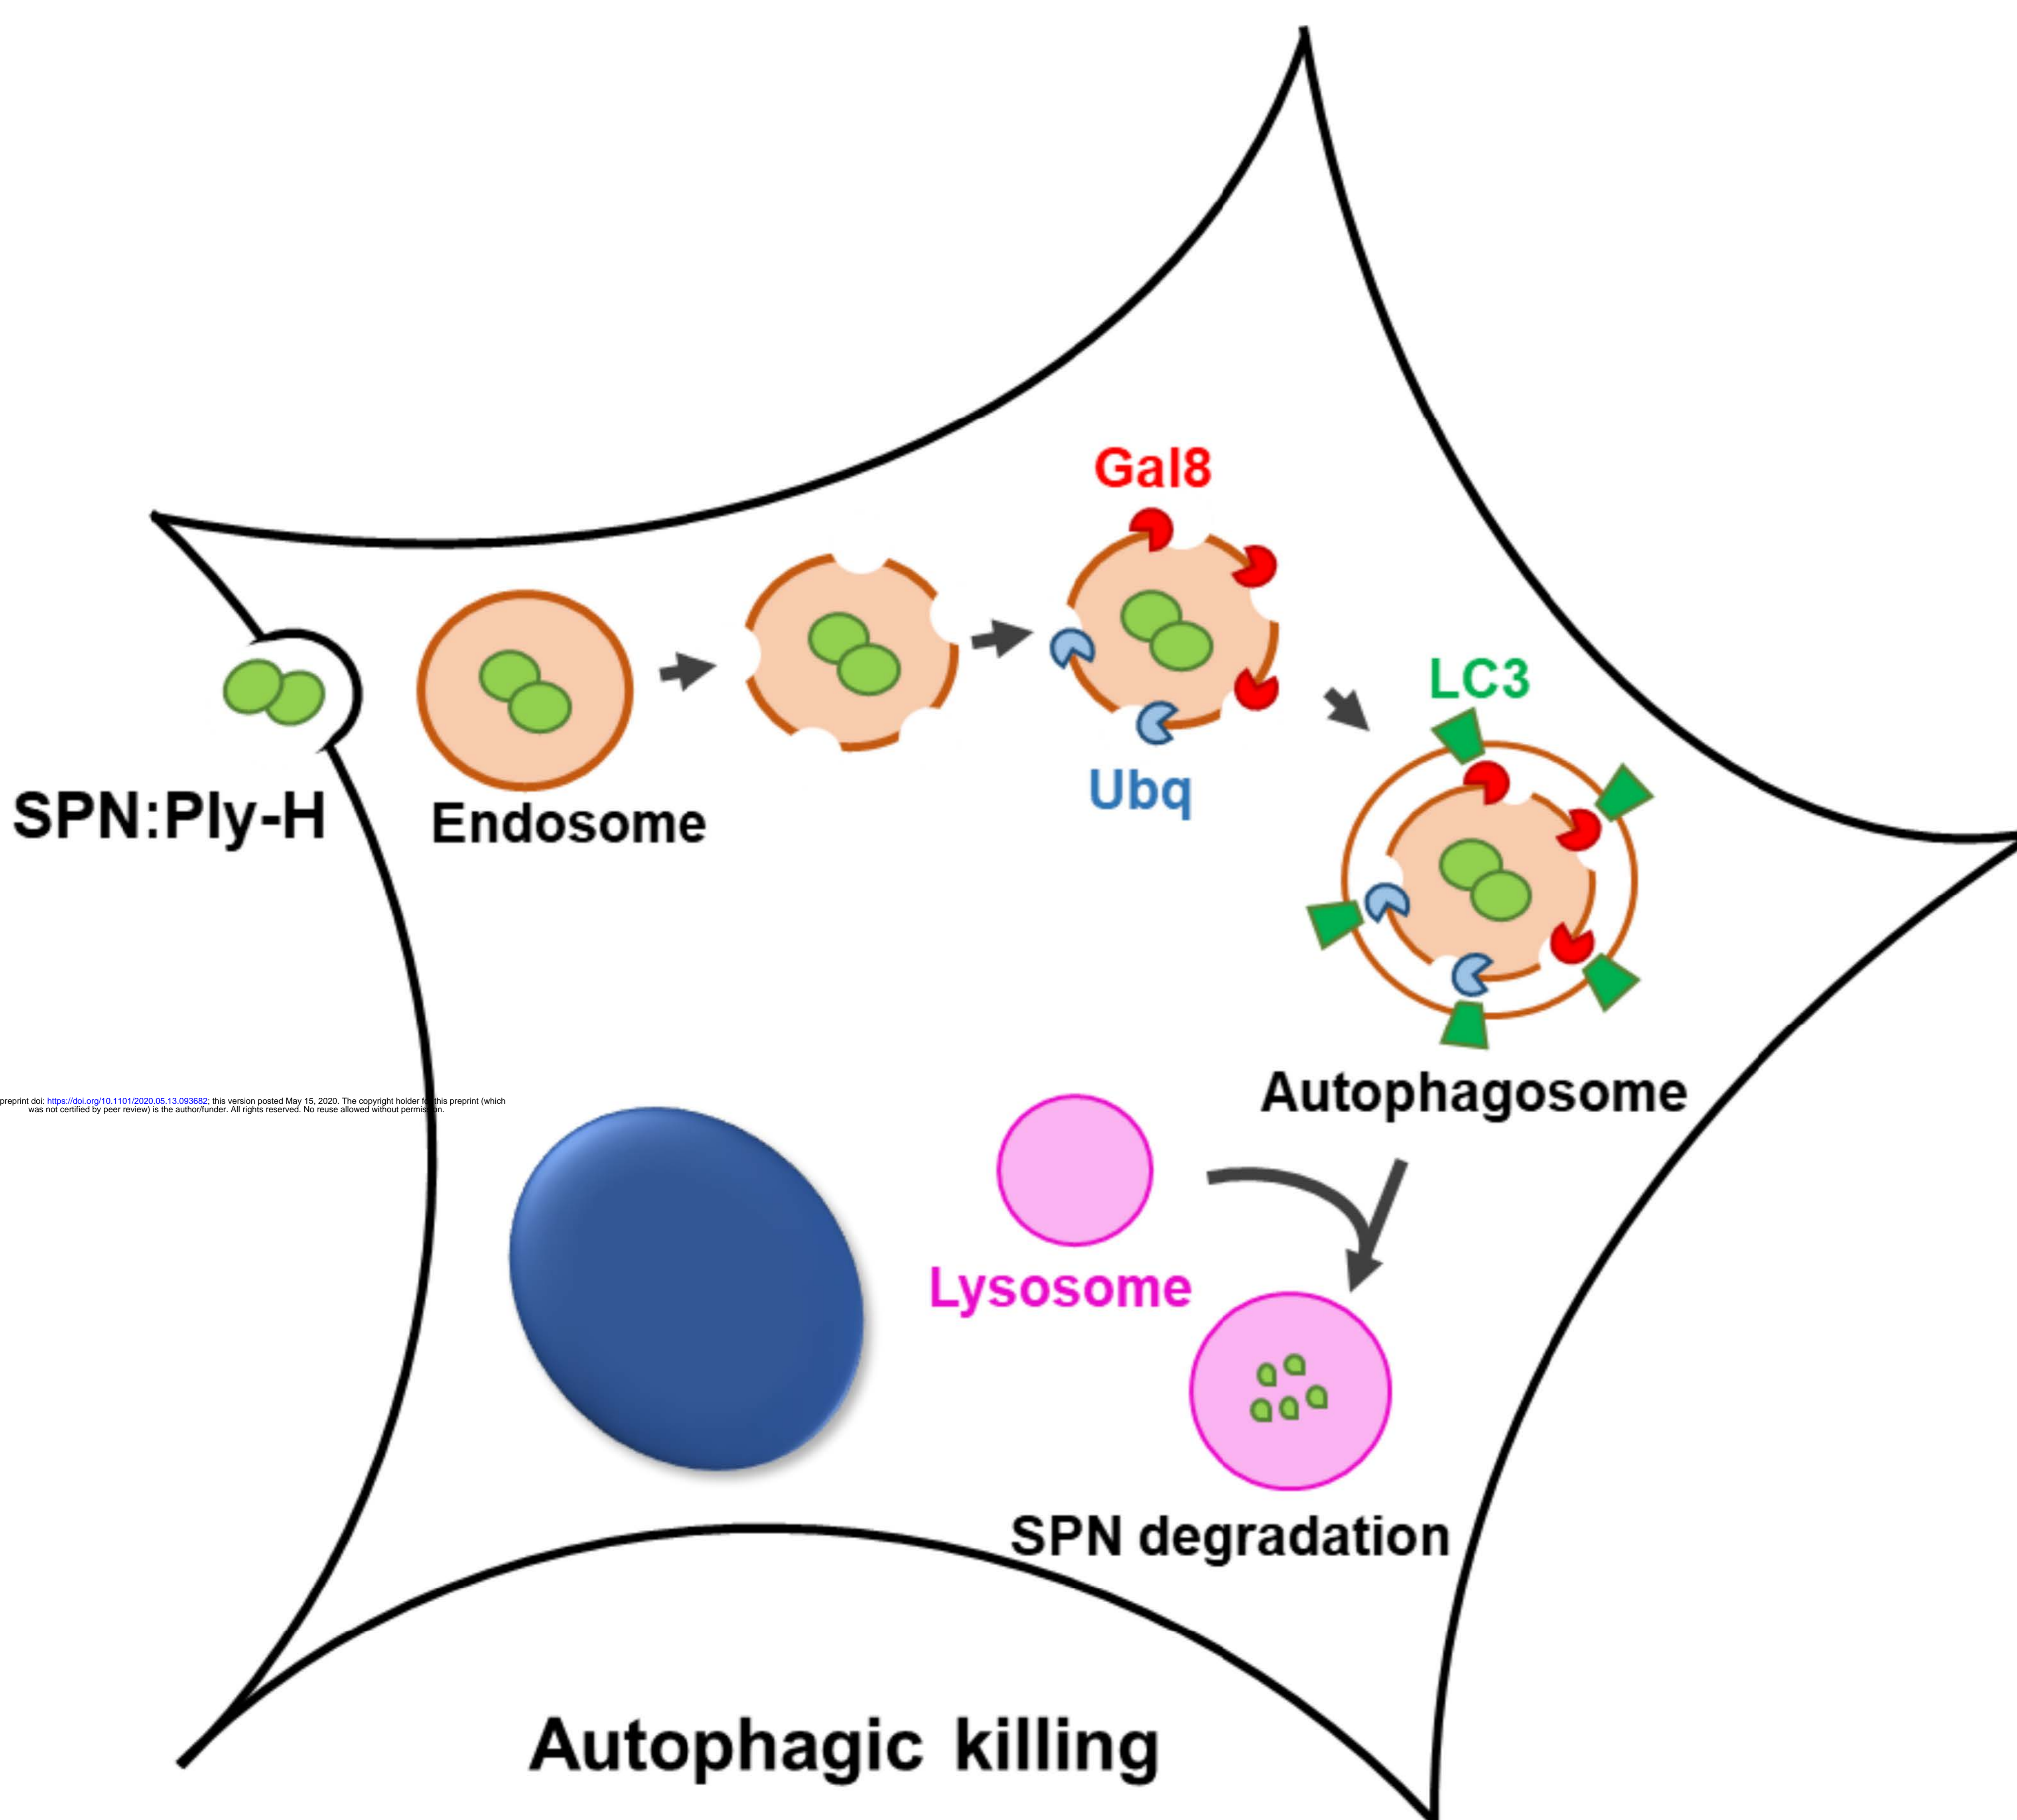

SPN:Ply-H

Endosome

Gal8

Ubq

LC3

Autophagosome

Lysosome

SPN degradation

Autophagic killing

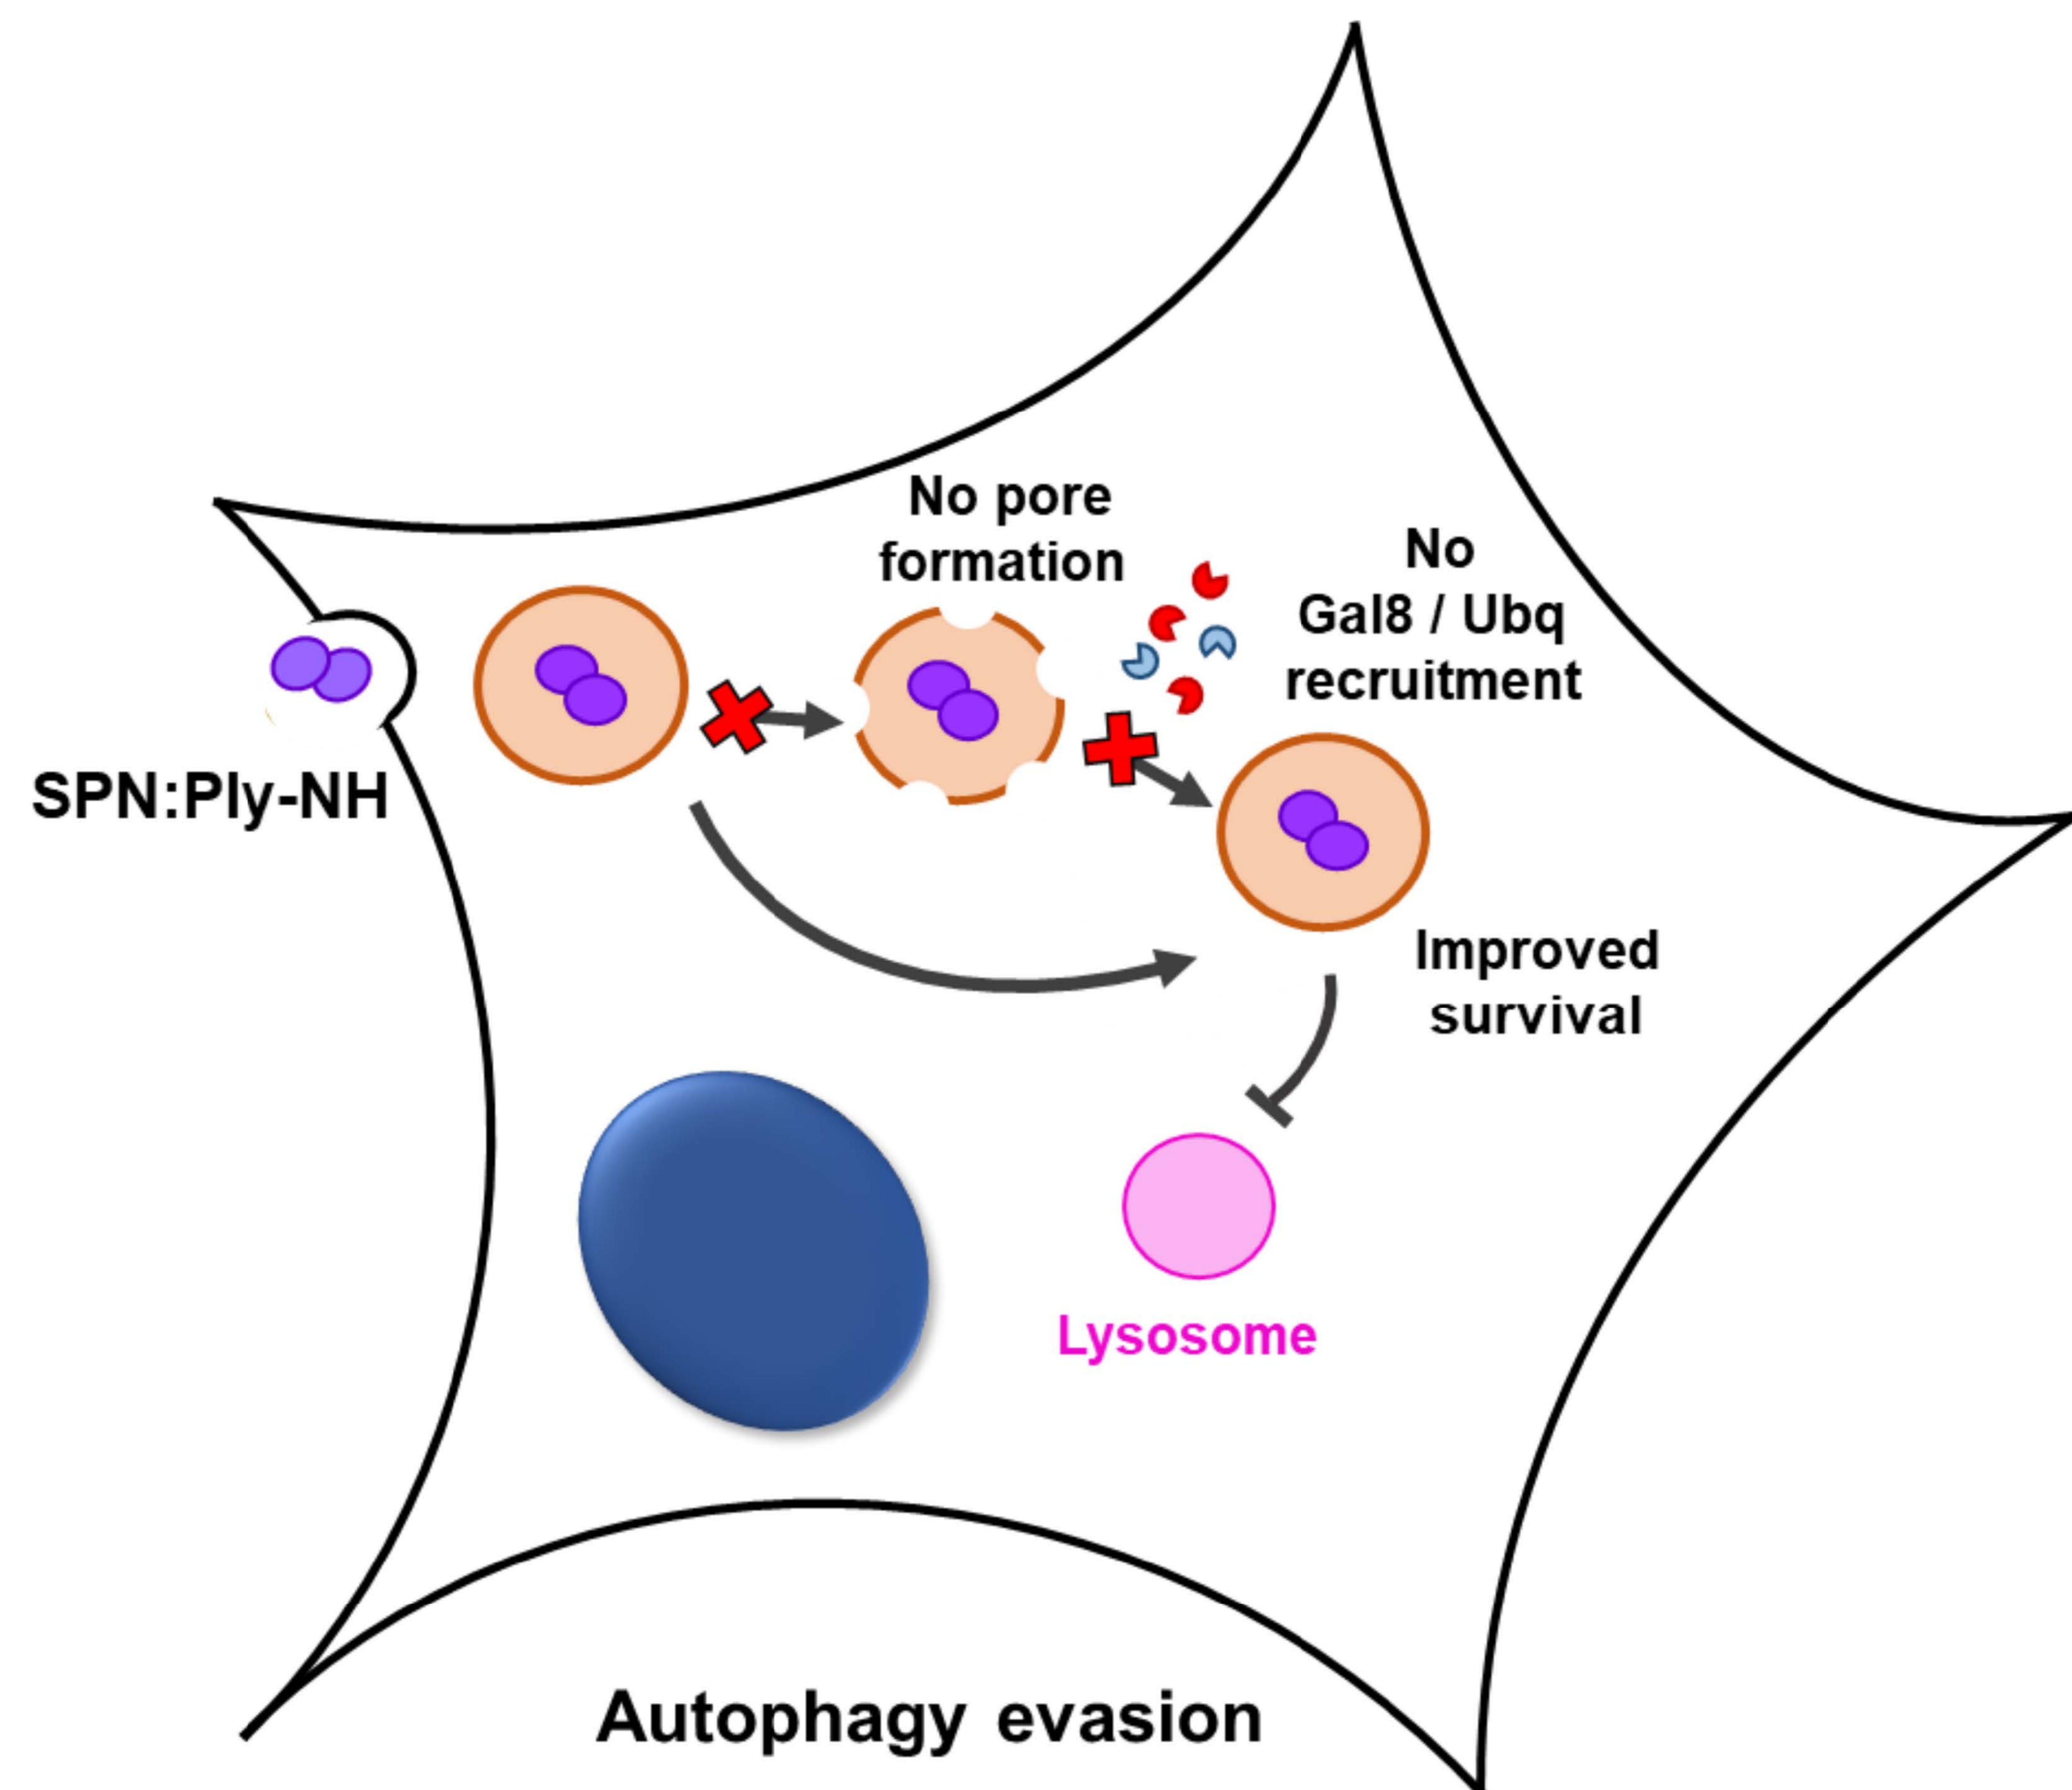

SPN:Ply-NH

No pore formation

No Gal8 / Ubq recruitment

Improved survival

Lysosome

Autophagy evasion
